# Supplementary material
Source: Royal Society of Chemistry journal article supplement (doi:10.1039/d6ob00423g)

## Electronic Supplementary Material (ESI)

# A convenient synthesis of 2,4-diarylpyrroles from $\beta$ -cyanoketones *via* reductive rearrangement of *in situ* generated 2-aminofurans

Dmitrii A. Aksenov, Tatyana S. Galushko, Daniil S. Garkusha, Maria S. Volosovtsova, Nicolai A. Aksenov, Nikolai A. Arutiunov, Daria I. Murashkina, Alexander V. Aksenov\*.

*Department of Chemistry, North Caucasus Federal University, 1a Pushkin St., Stavropol 355017, Russia.*

Department of Chemistry, North Caucasus Federal University, 1a Pushkin St., Stavropol 355017, Russia.

|                                                                                   |     |
|-----------------------------------------------------------------------------------|-----|
| 1. $^1\text{H}$ and $^{13}\text{C}$ NMR spectral charts of compounds <b>3h,3k</b> | S2  |
| 2. $^1\text{H}$ and $^{13}\text{C}$ NMR spectral charts of compounds <b>14</b>    | S6  |
| 3. $^1\text{H}$ and $^{13}\text{C}$ NMR spectral charts of compound <b>15</b>     | S44 |
| 4. $^1\text{H}$ and $^{13}\text{C}$ NMR spectral charts of compound <b>16a</b>    | S46 |
| 5. $^1\text{H}$ and $^{13}\text{C}$ NMR spectral charts of compound <b>17a</b>    | S48 |
| 6. $^1\text{H}$ and $^{13}\text{C}$ NMR spectral charts of compound <b>18a</b>    | S50 |
| 7. HRMS-analysis of reaction mixture                                              | S52 |

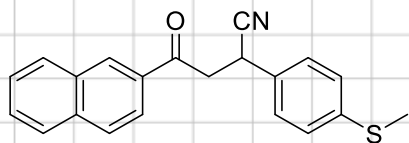

$^1\text{H}$  NMR spectrum of compound **3h**  
in DMSO-*d*<sub>6</sub> (400 MHz)

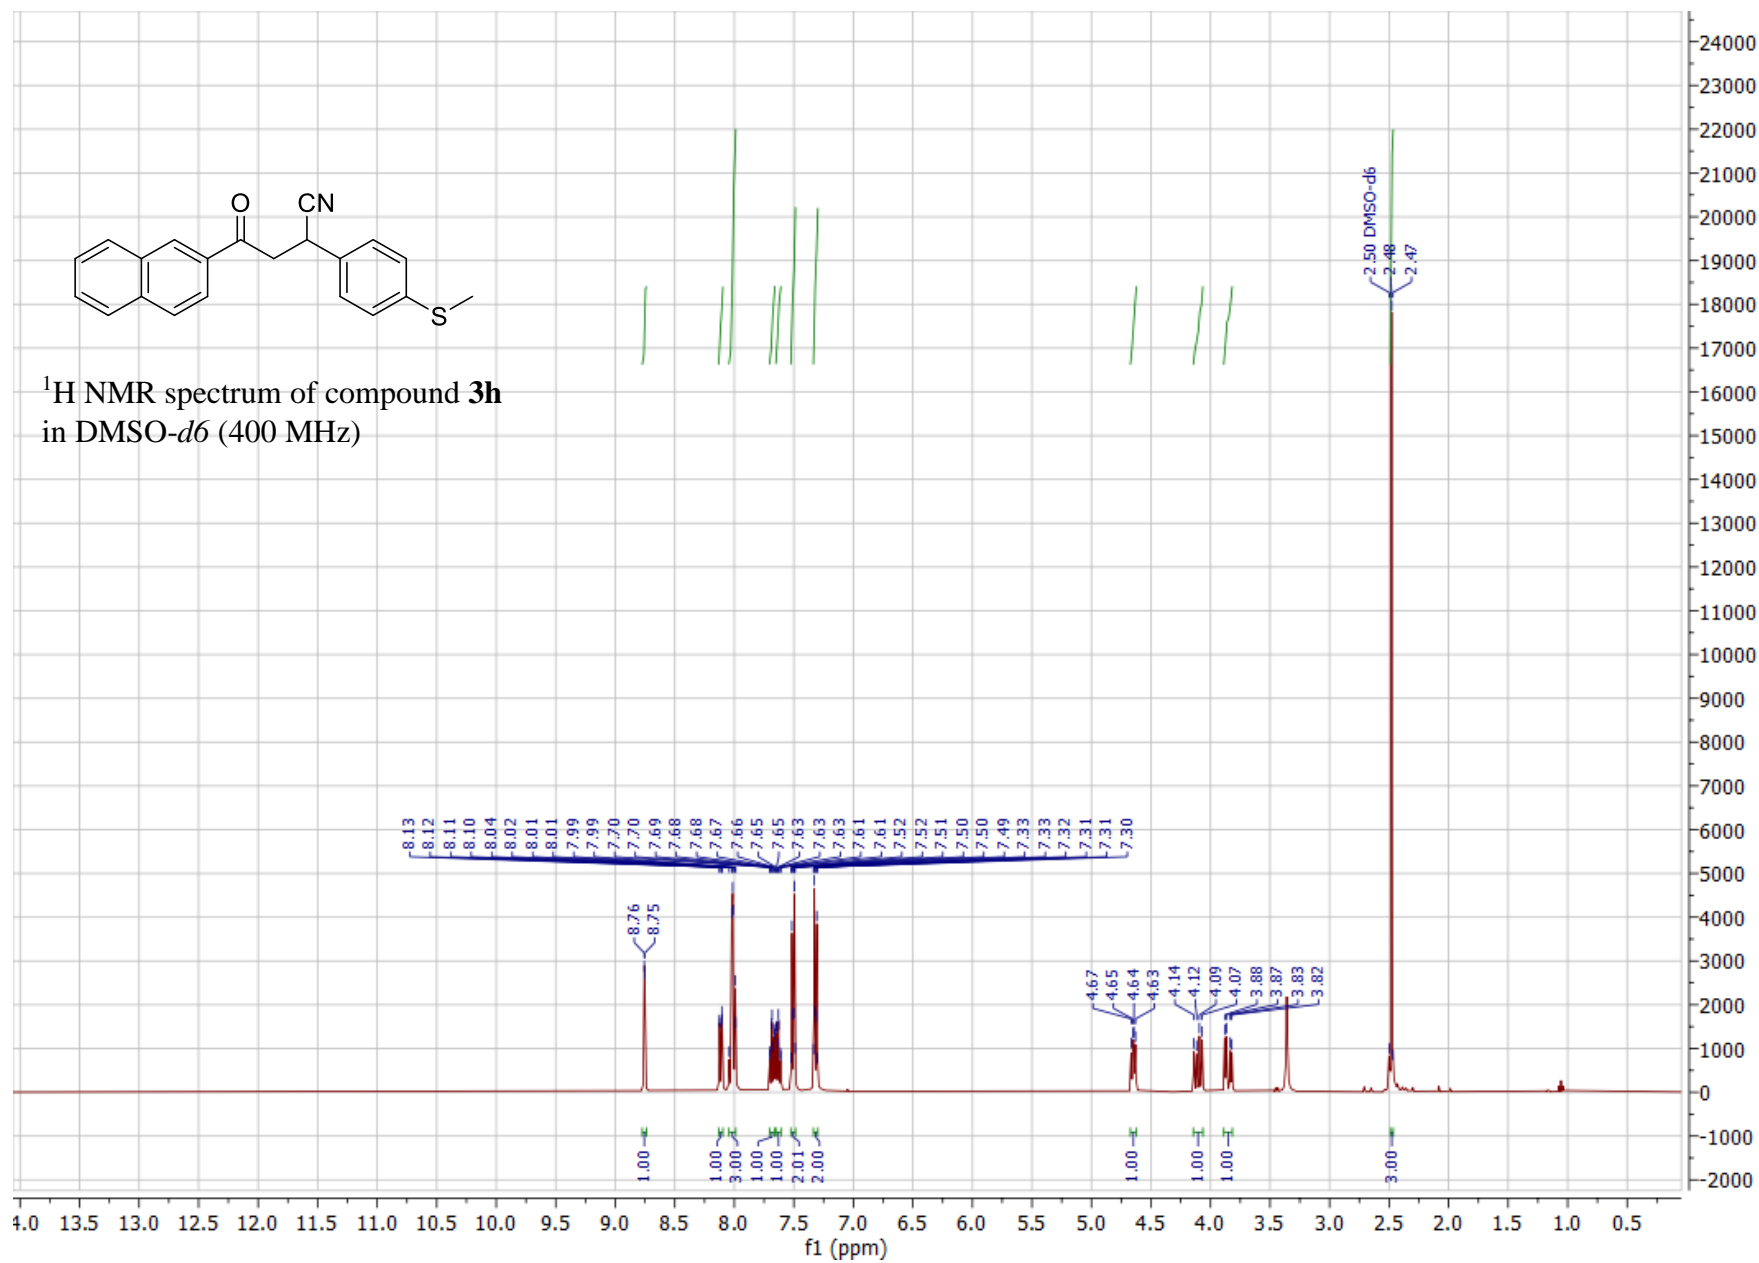

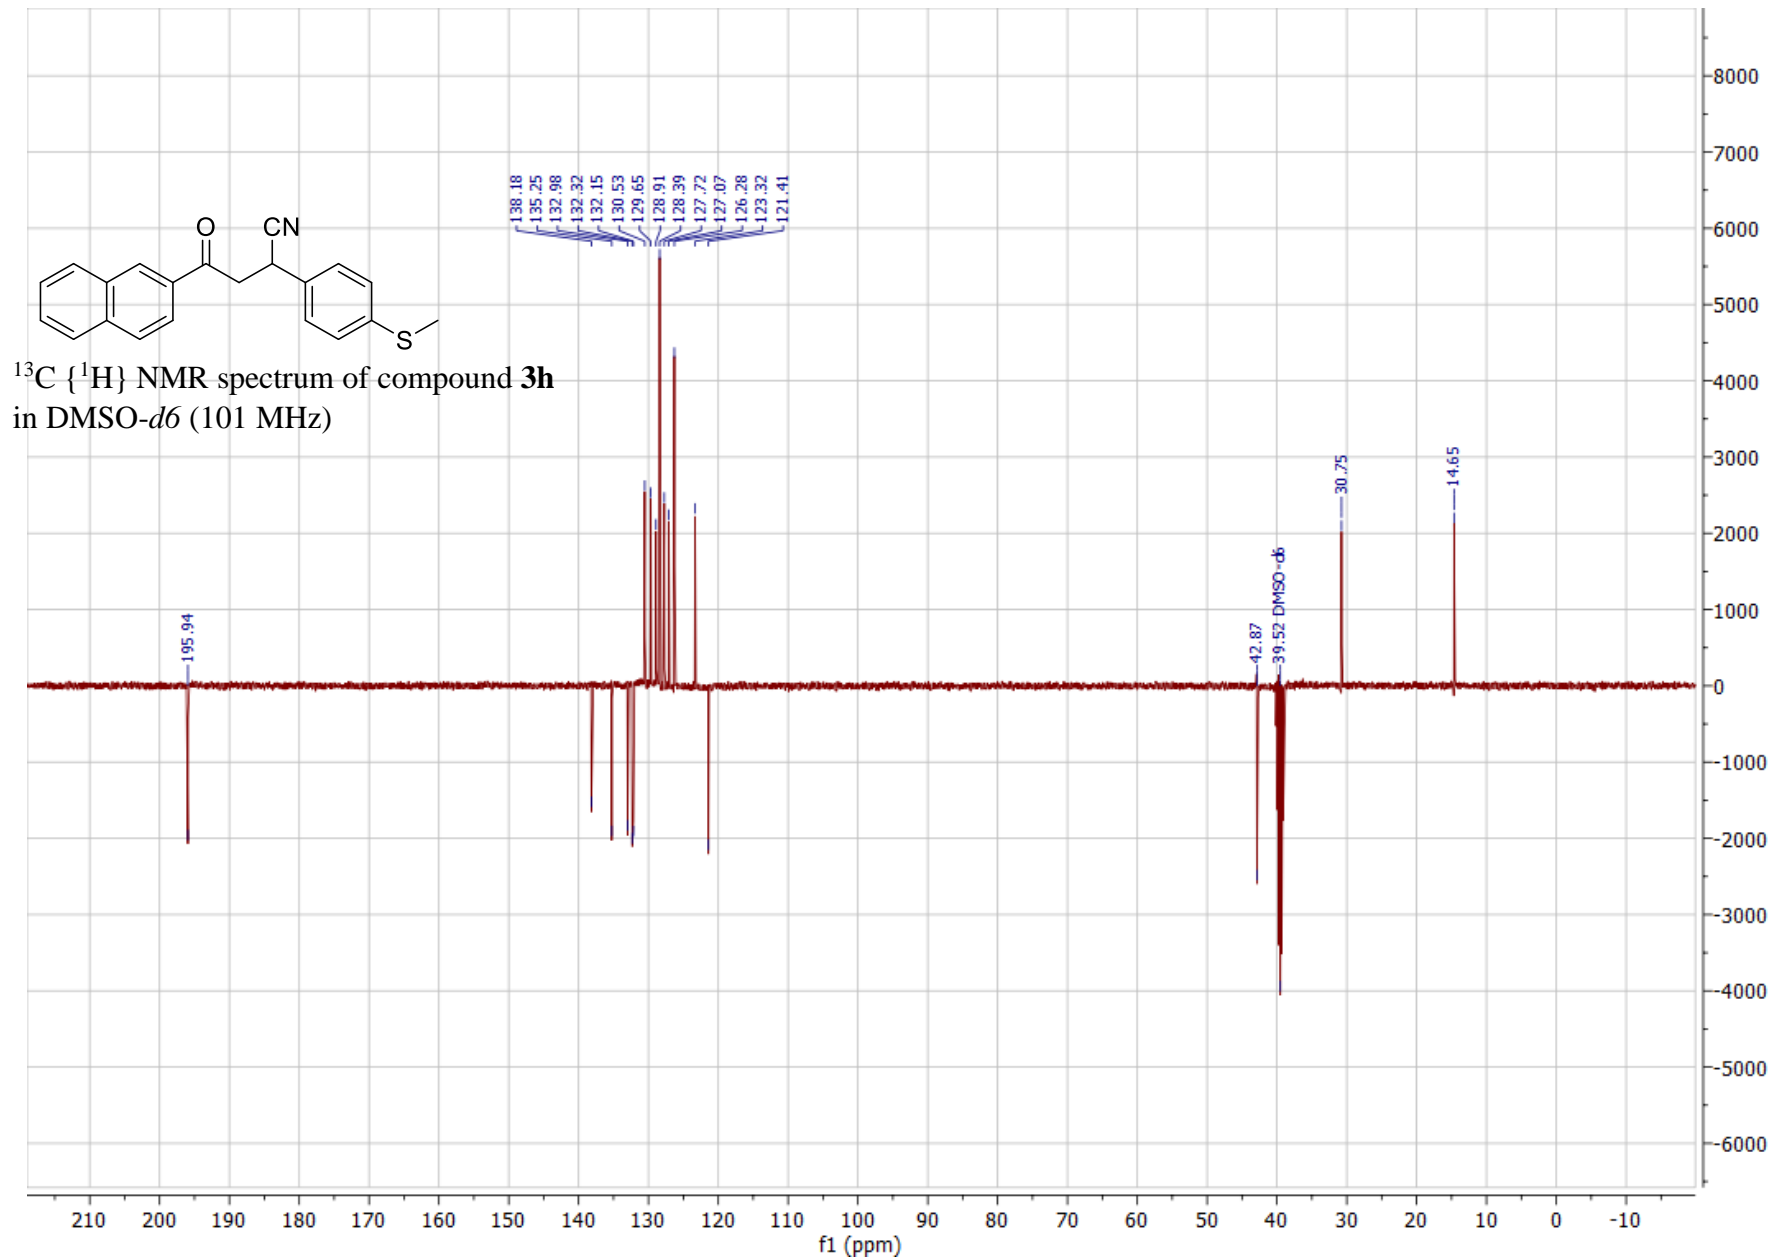

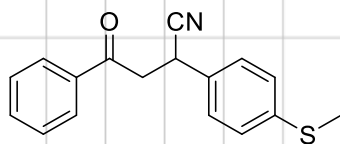

<sup>1</sup>H NMR spectrum of compound **3k**  
in DMSO-d<sub>6</sub> (400 MHz)

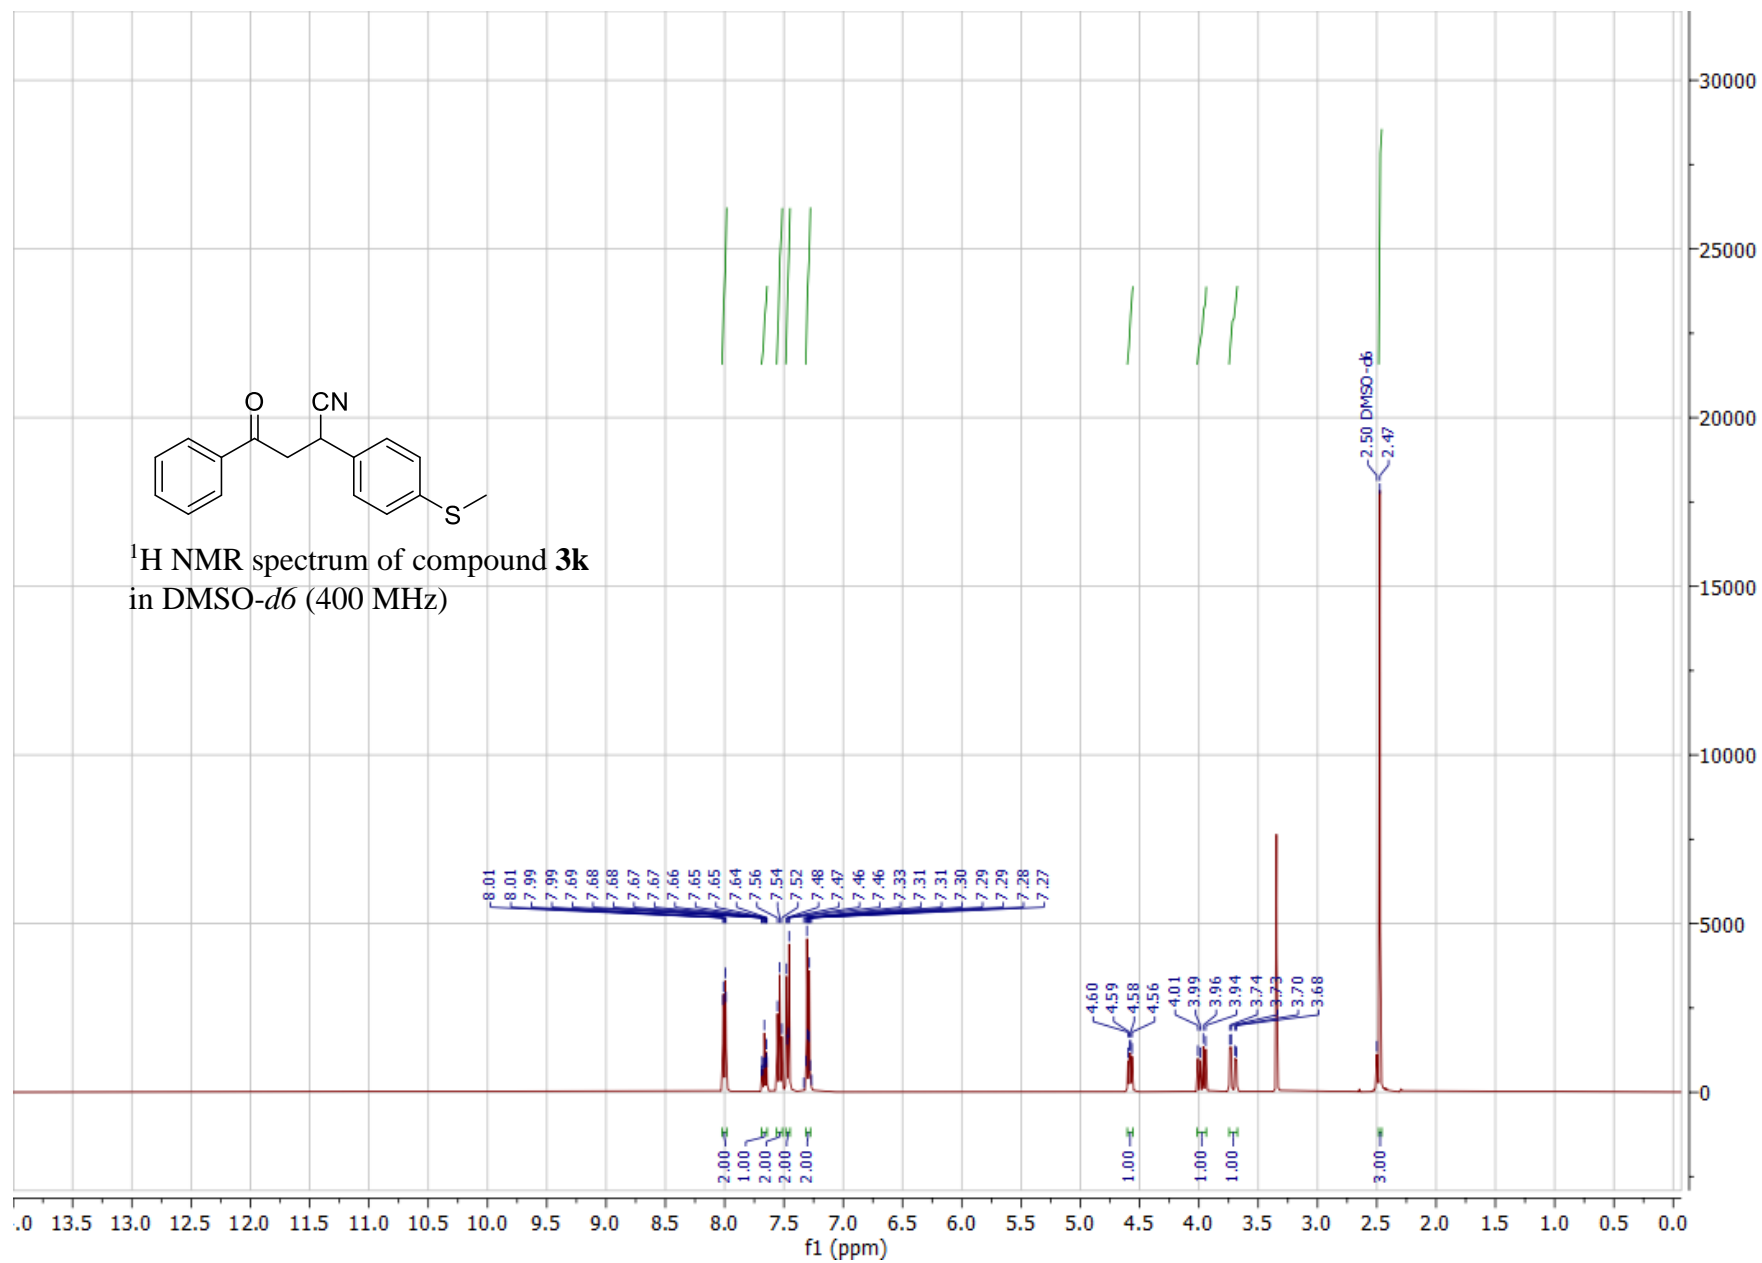

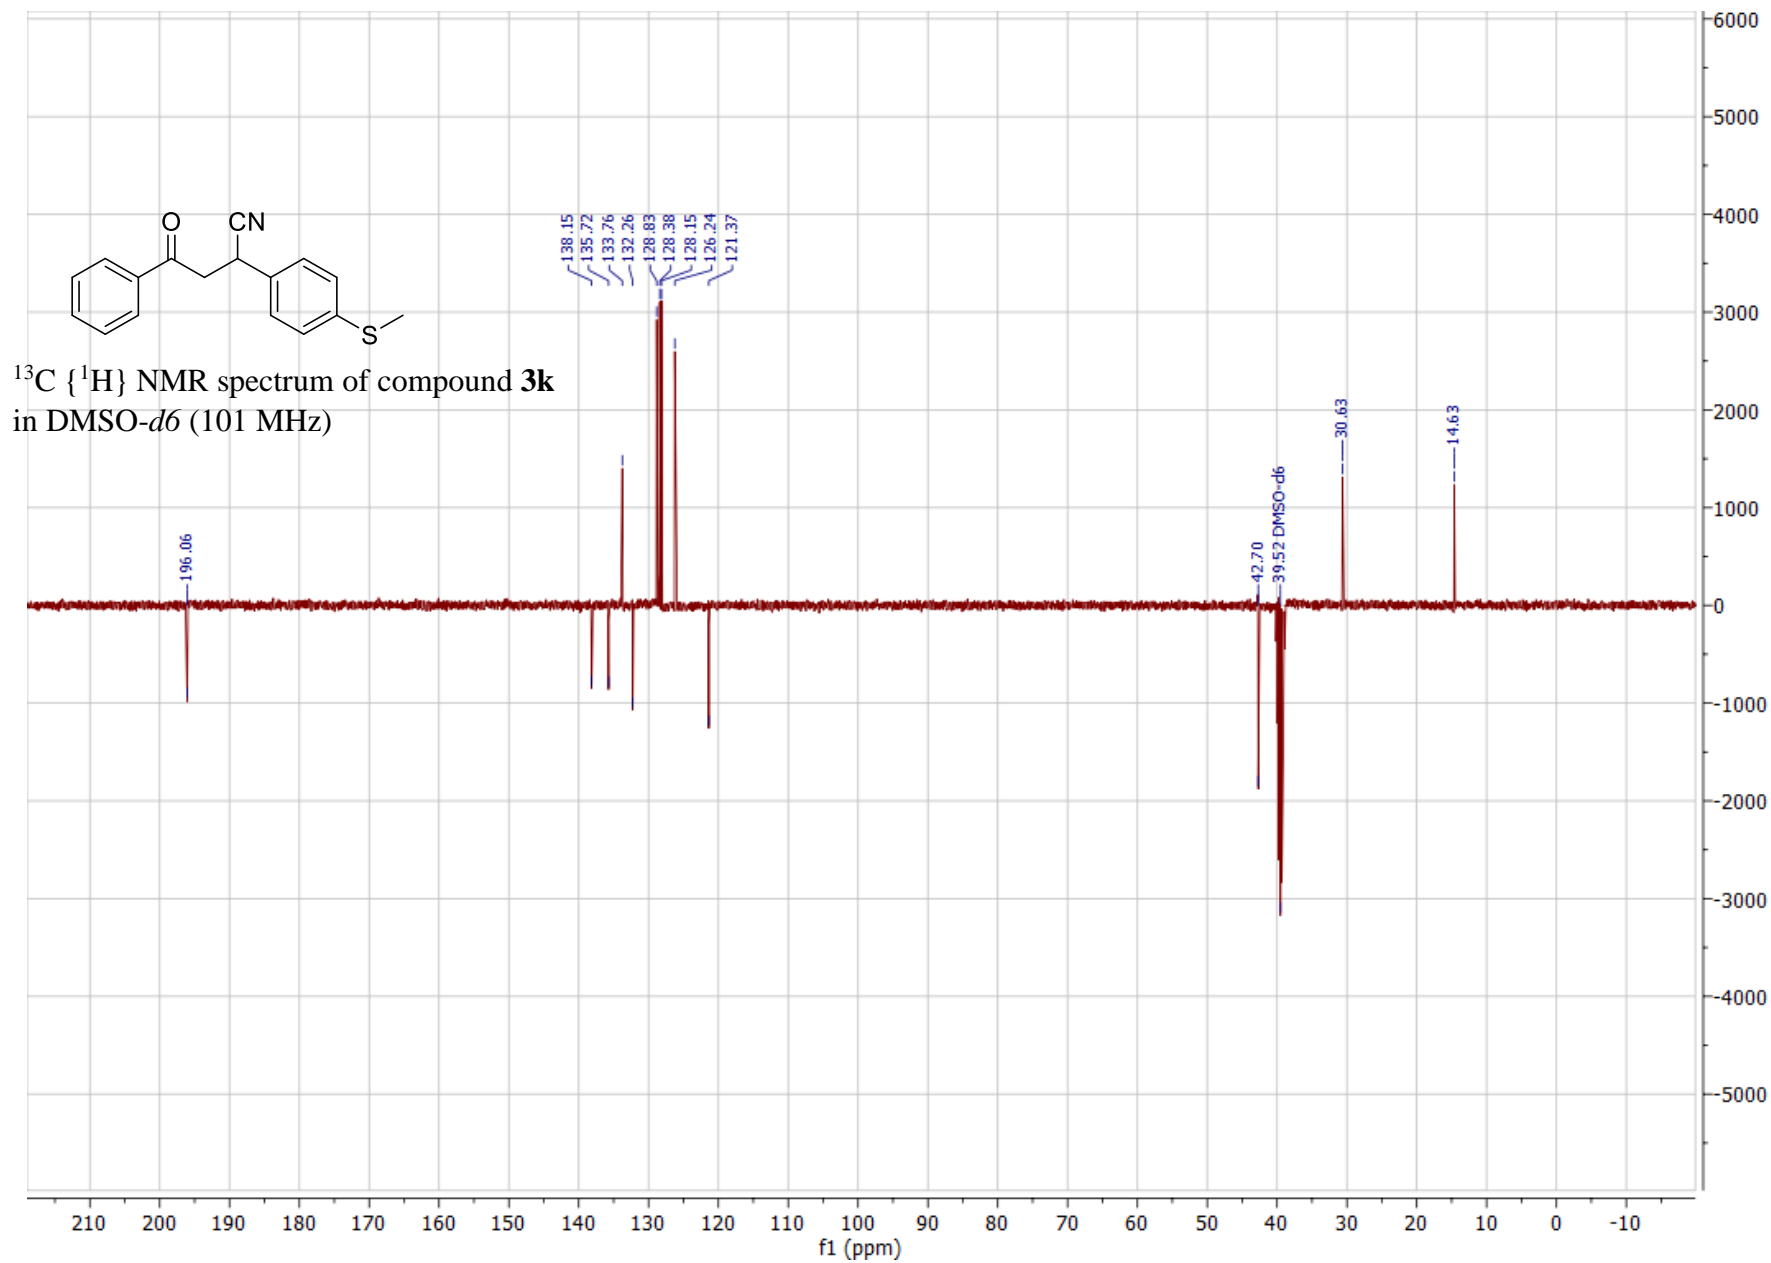

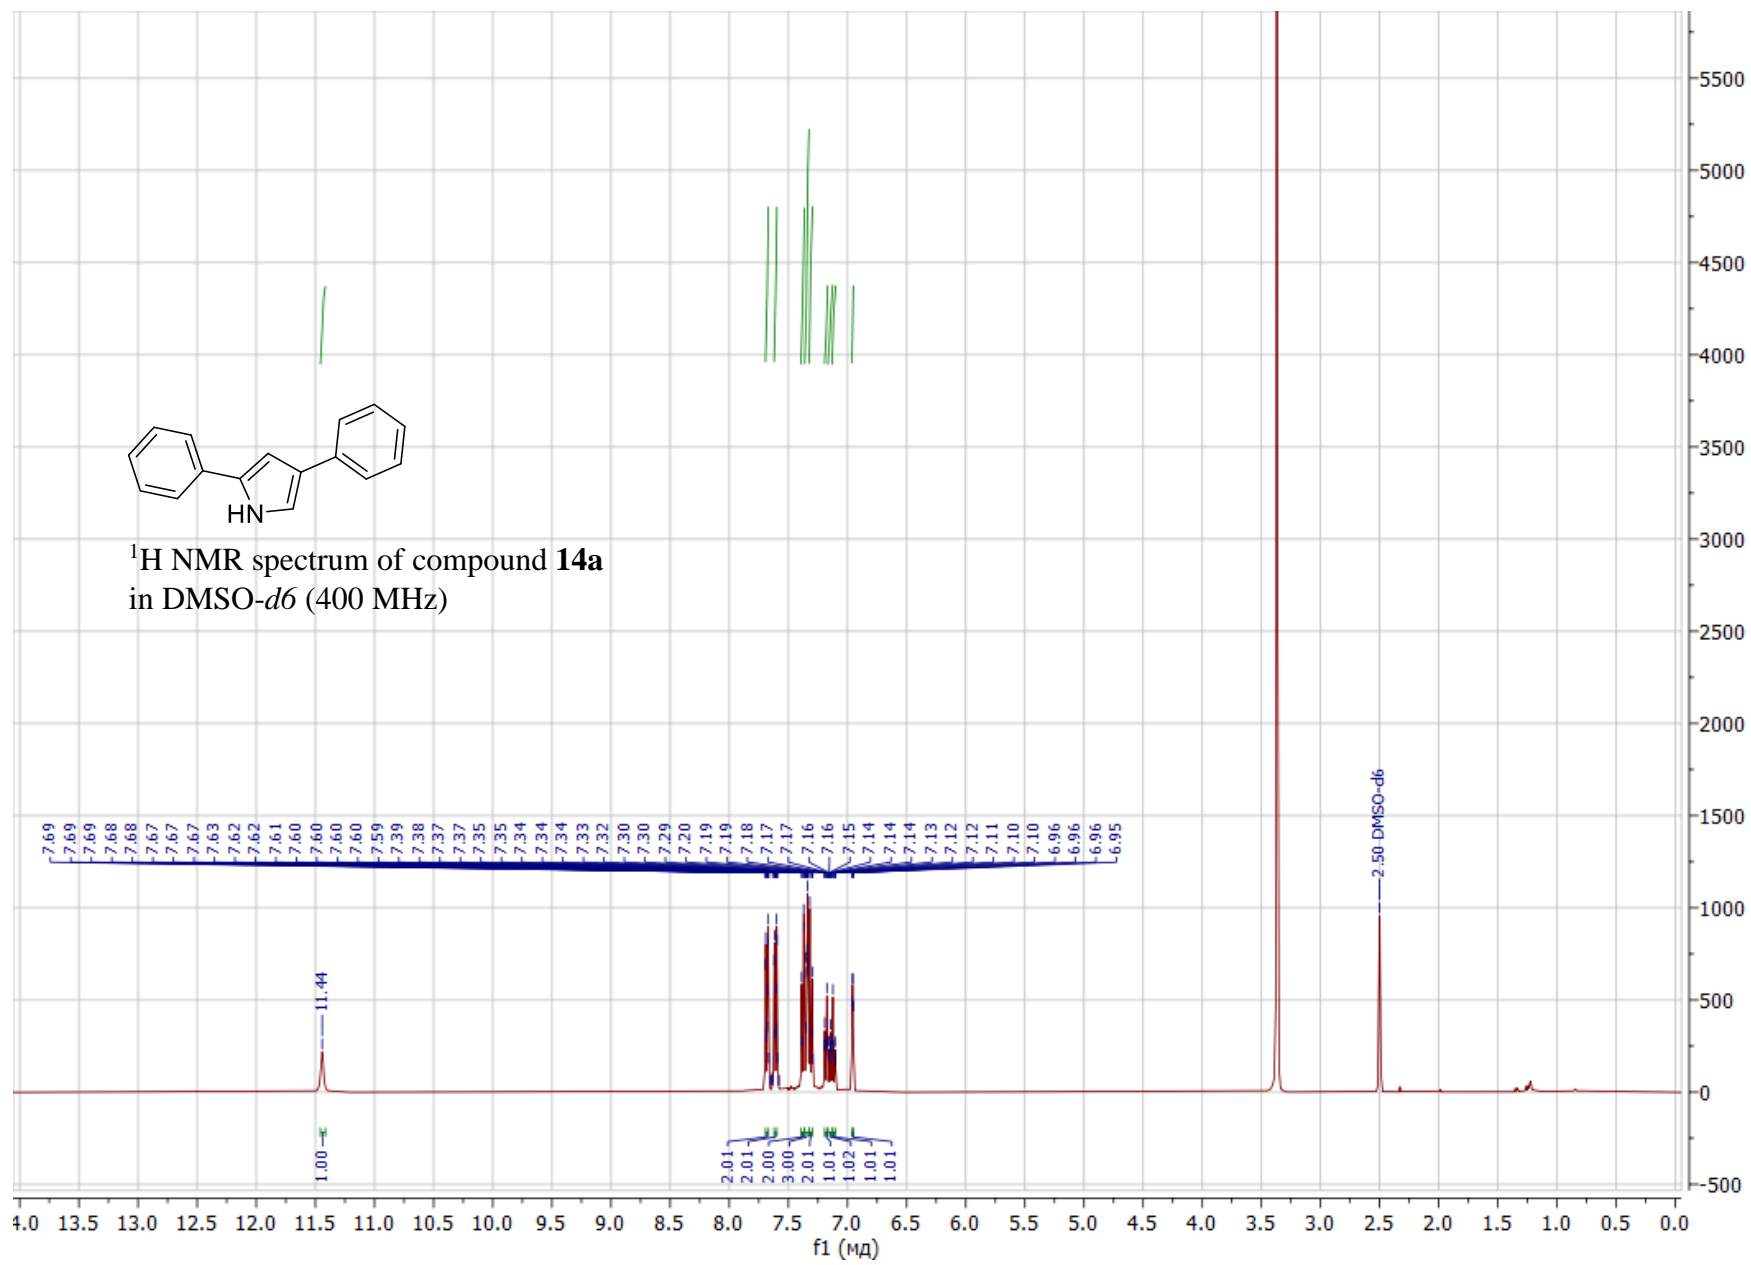

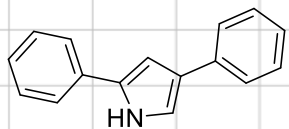

$^{13}\text{C}$   $\{^1\text{H}\}$  NMR spectrum of compound **14a**  
in DMSO-*d*<sub>6</sub> (101 MHz)

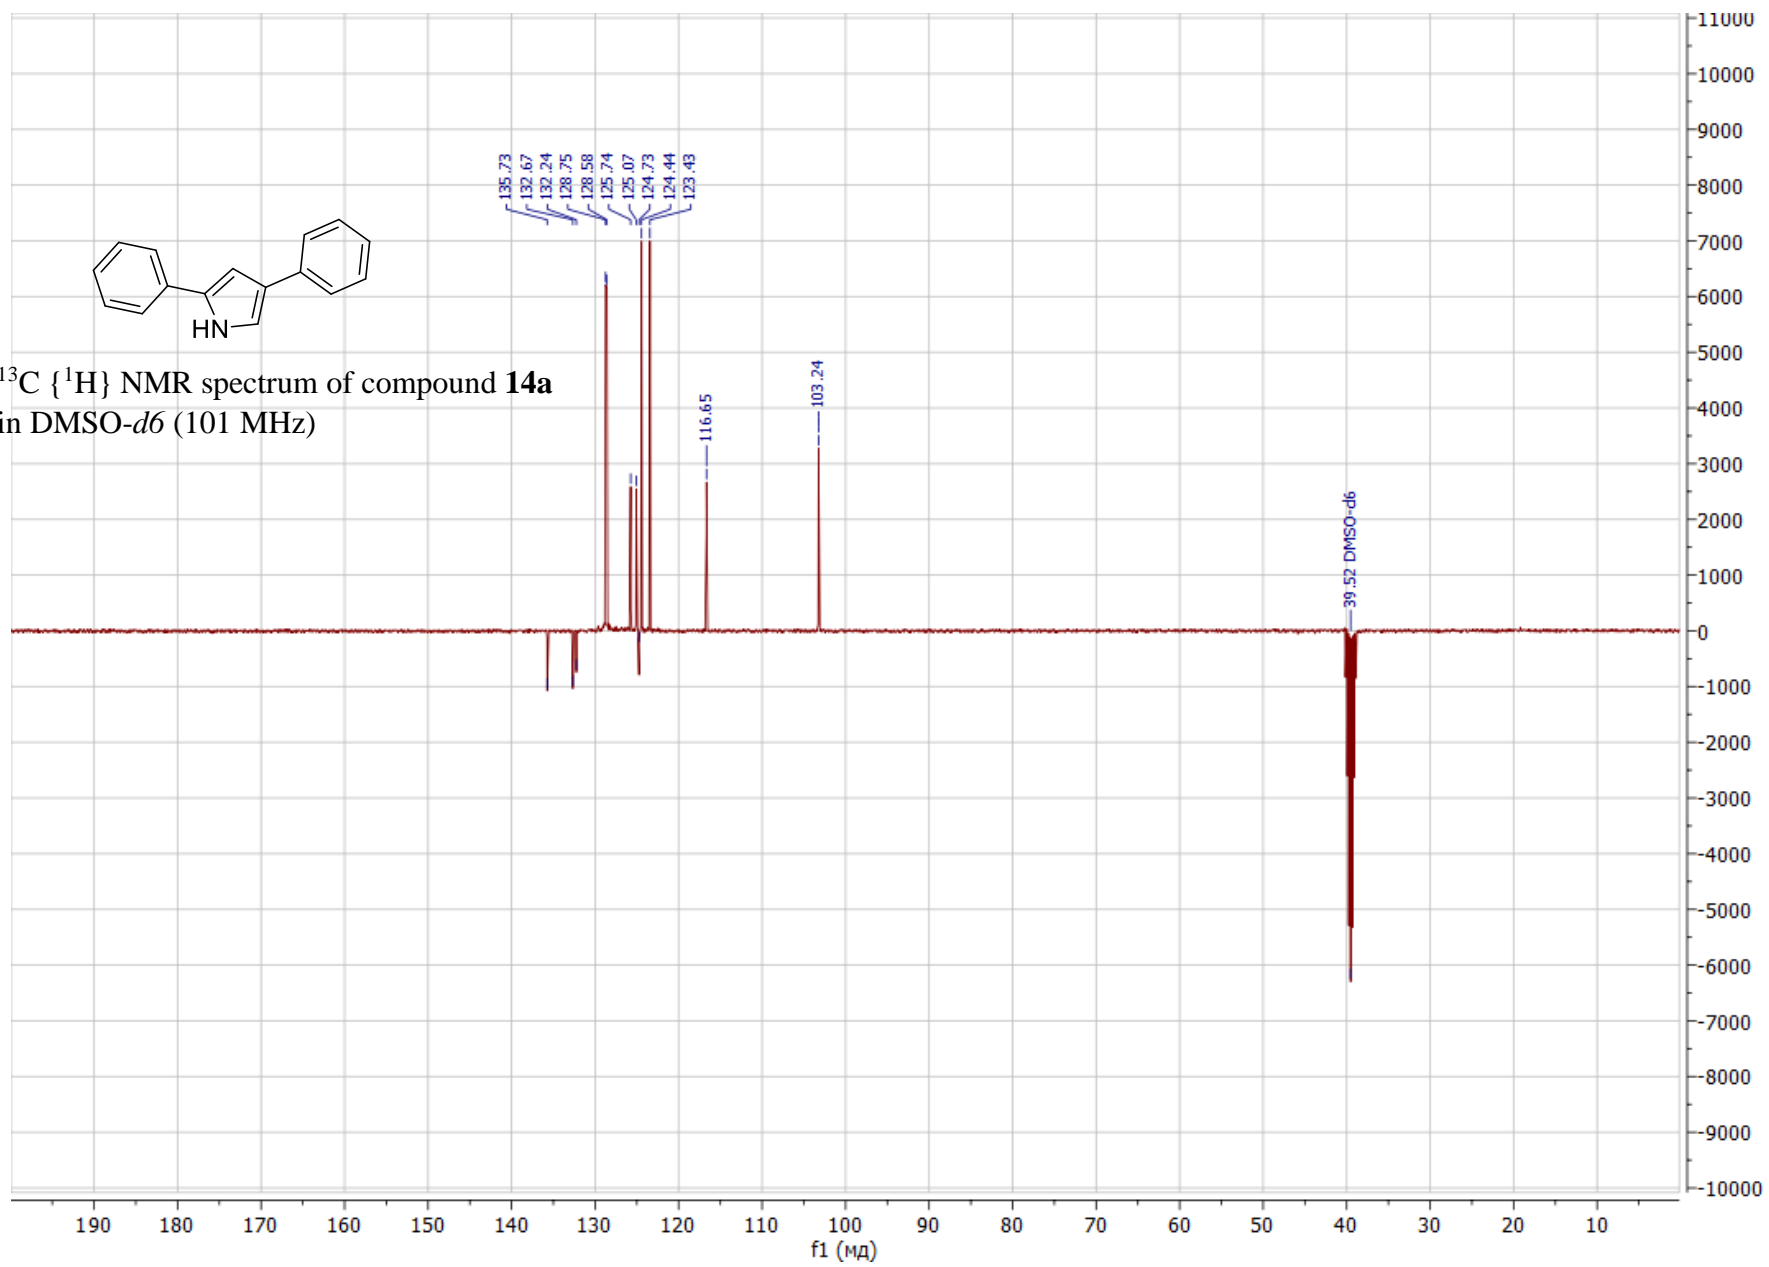

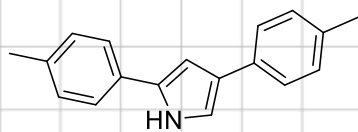

<sup>1</sup>H NMR spectrum of compound **14b**  
in DMSO-*d*<sub>6</sub> (400 MHz)

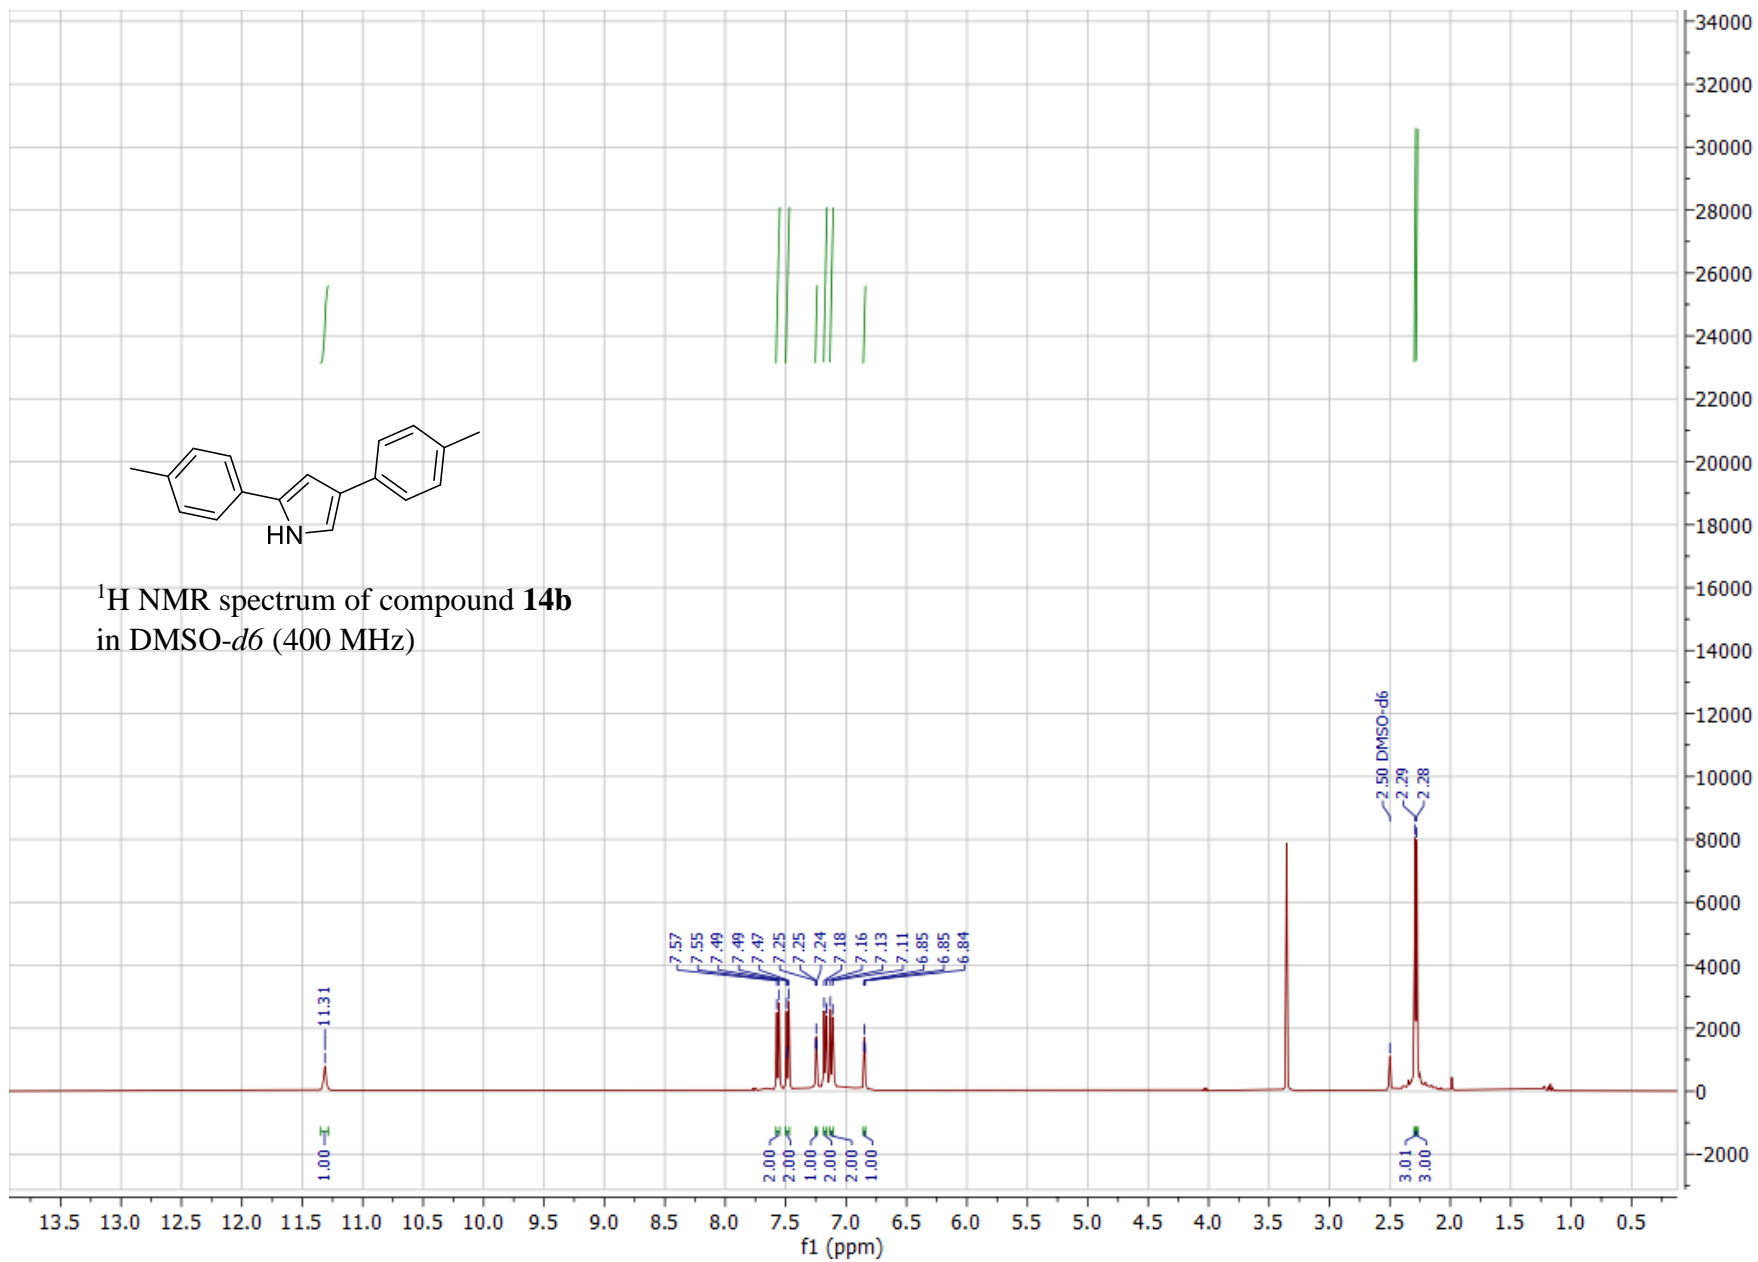

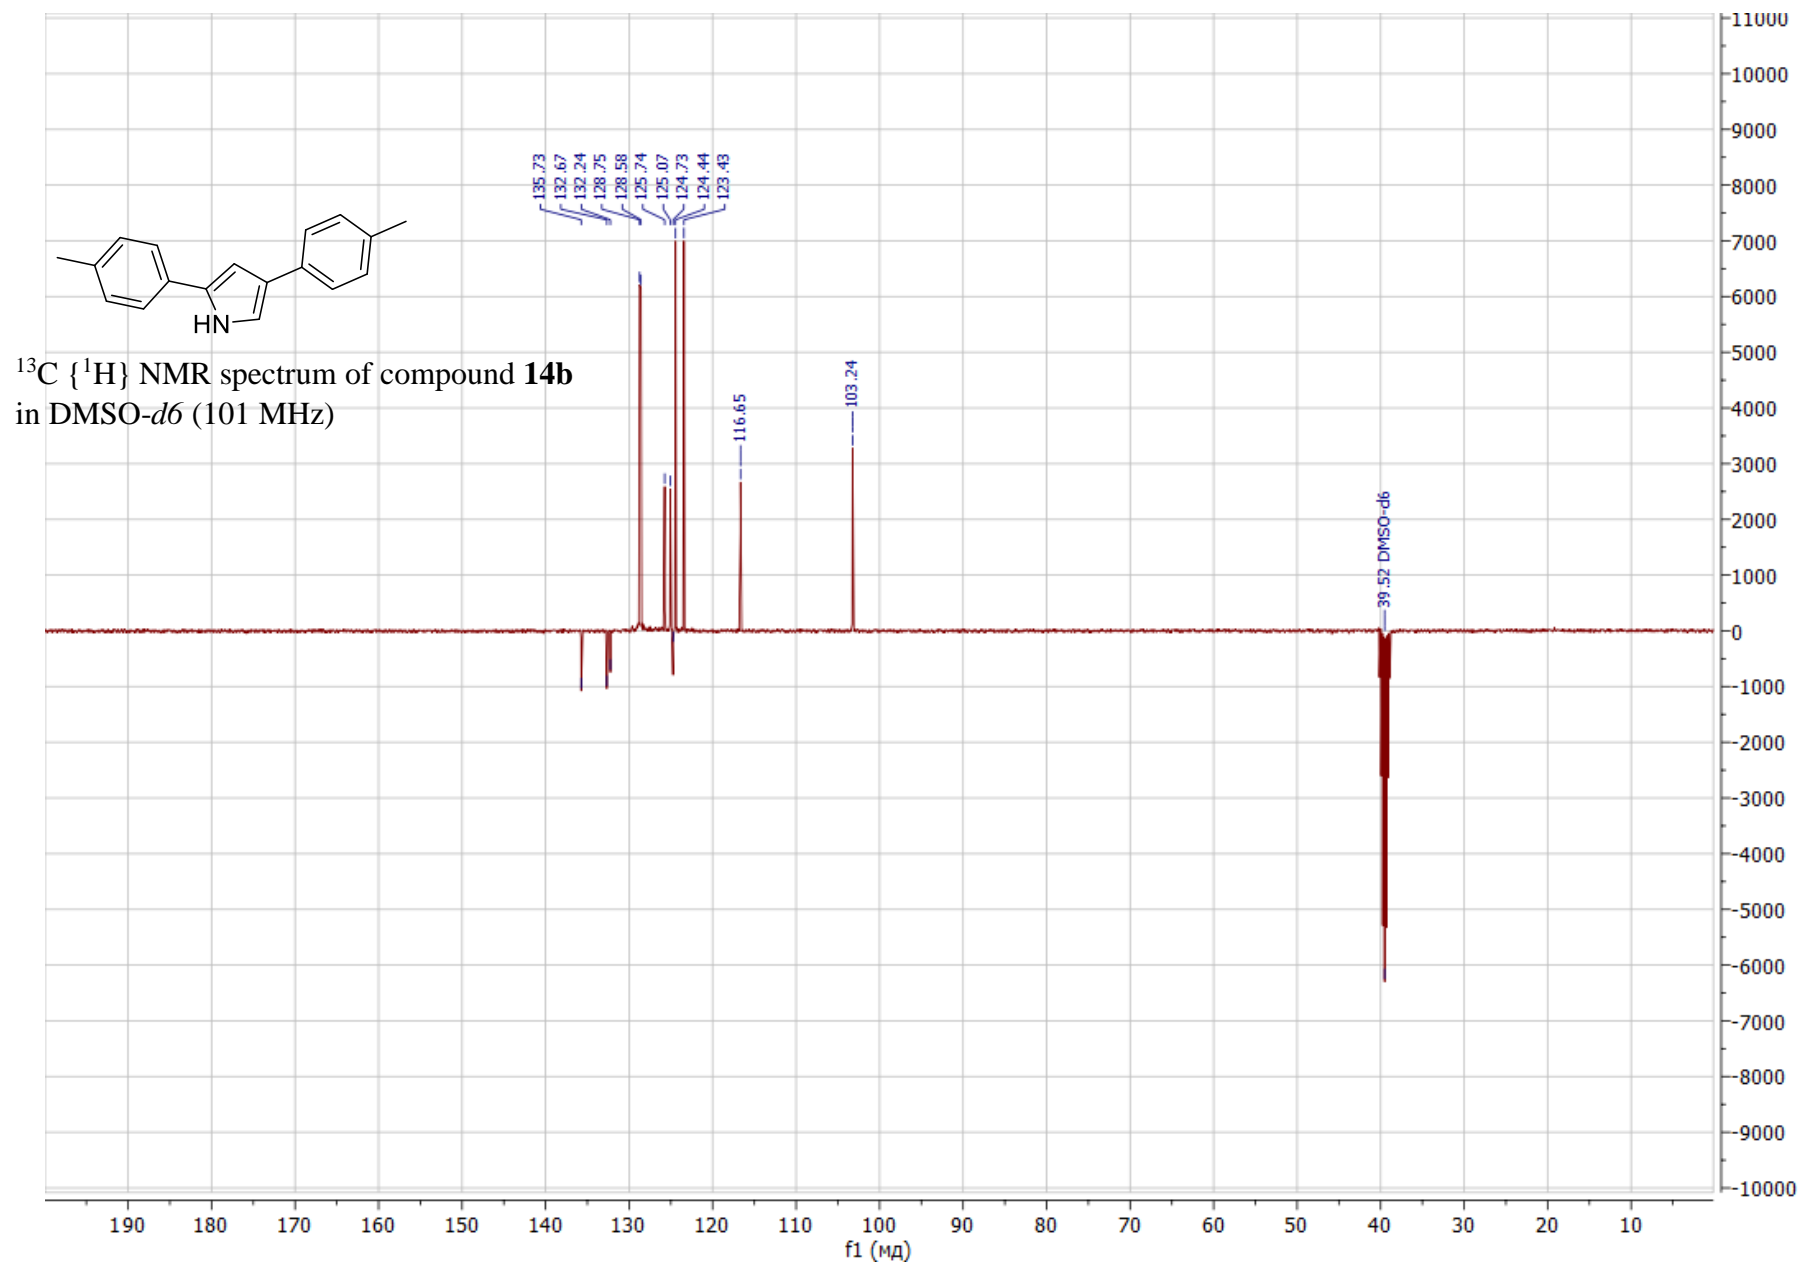

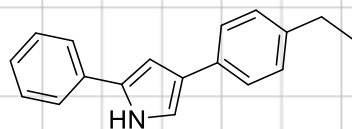

$^1\text{H}$  NMR spectrum of compound **14c**  
in DMSO-*d*<sub>6</sub> (400 MHz)

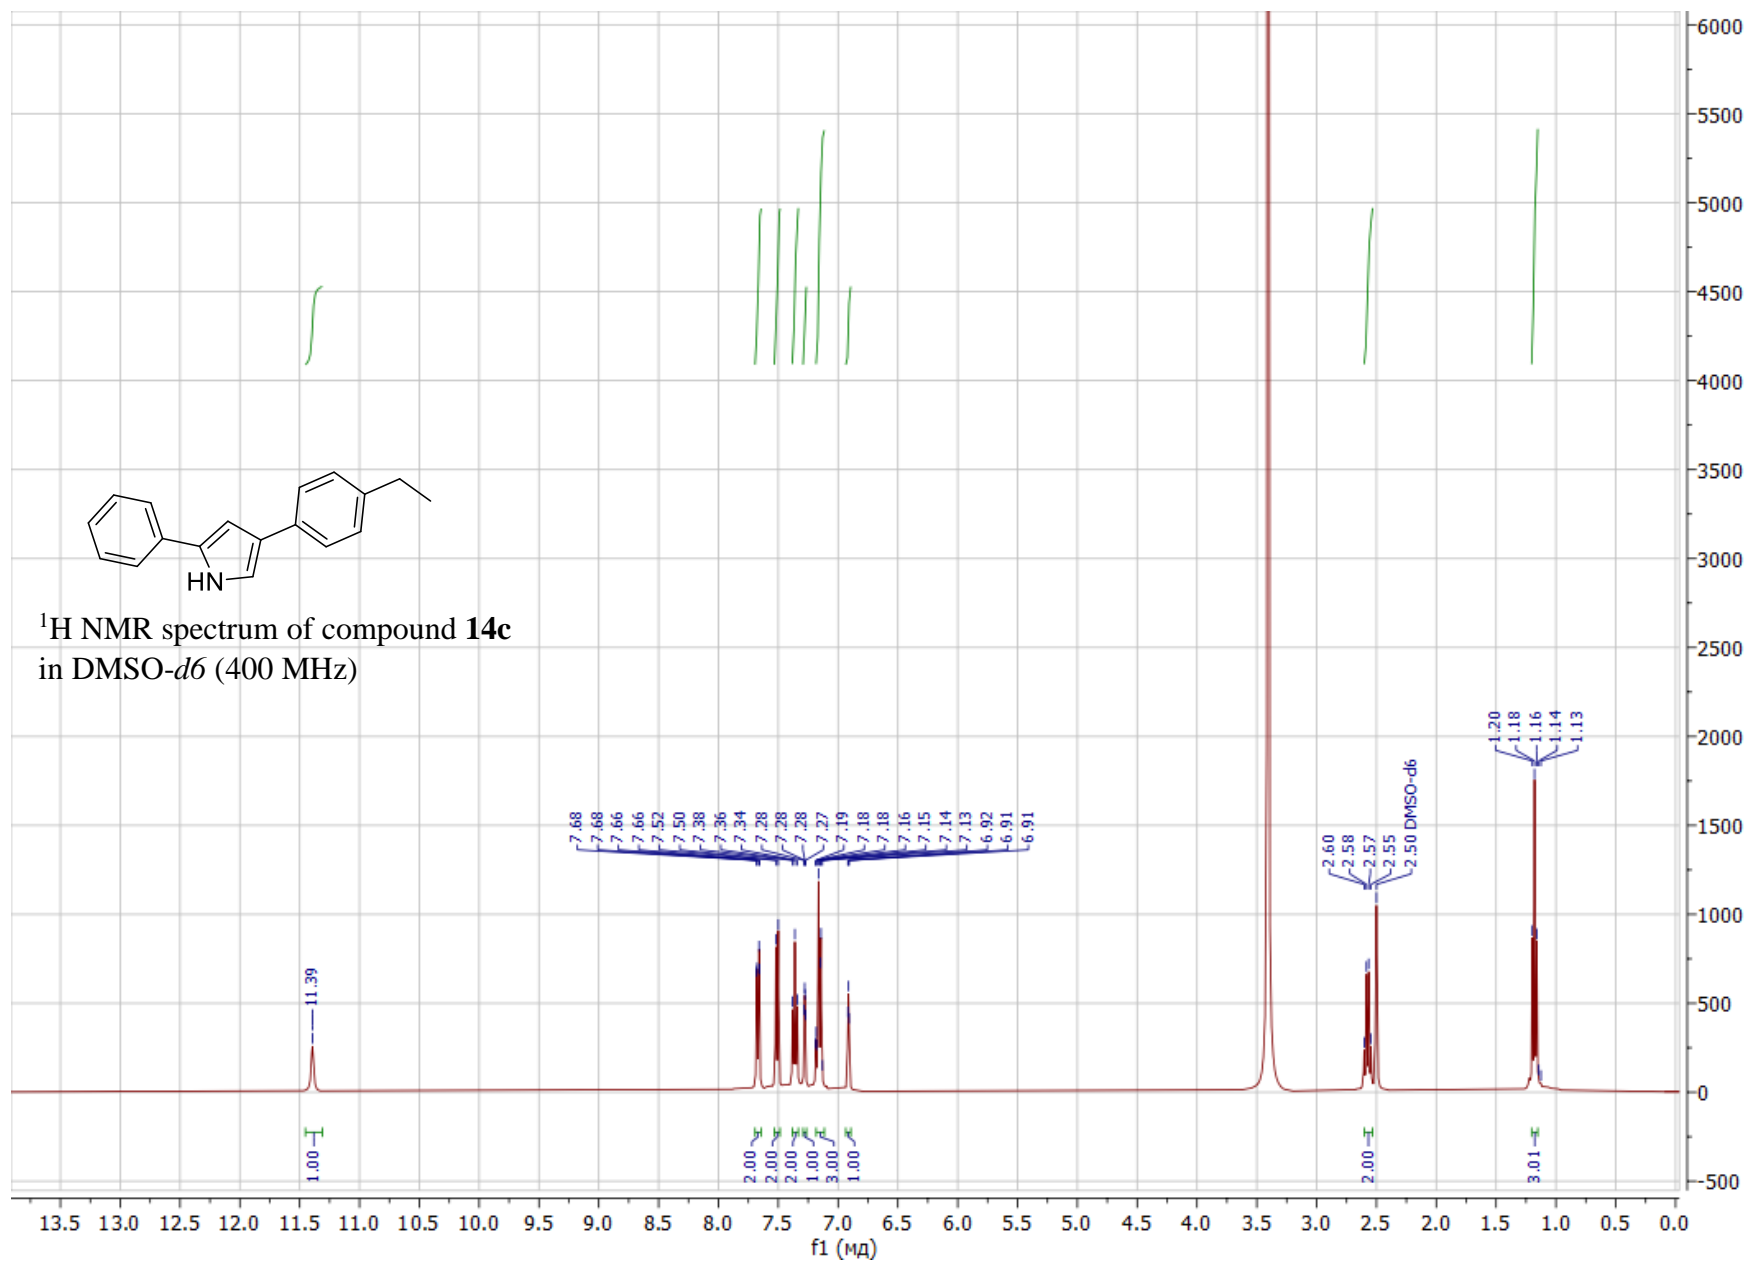

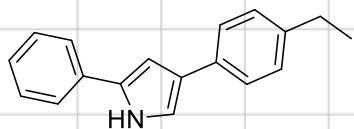

$^{13}\text{C}$   $\{^1\text{H}\}$  NMR spectrum of compound **14c**  
in DMSO-*d*<sub>6</sub> (101 MHz)

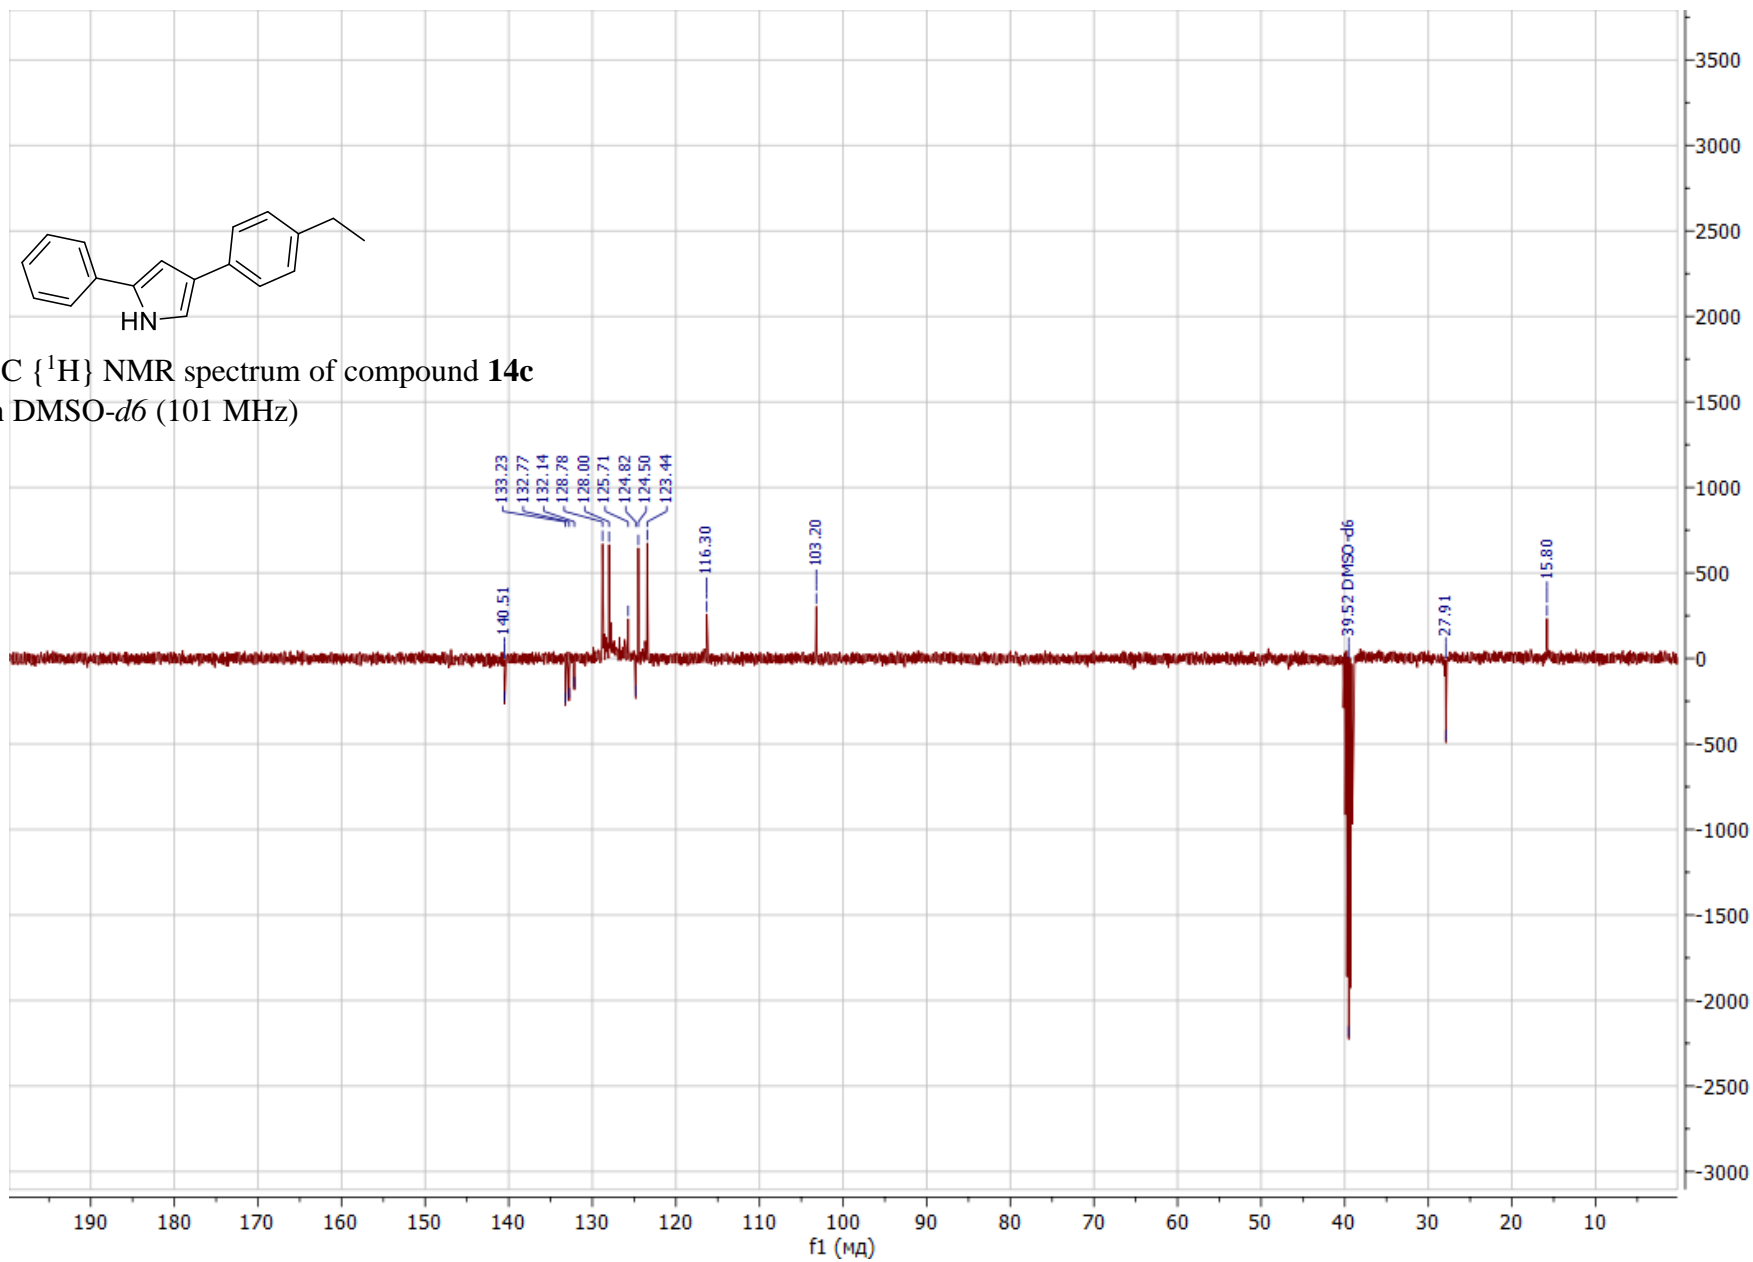

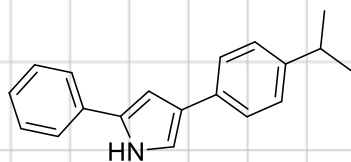

<sup>1</sup>H NMR spectrum of compound **14d**  
in DMSO-*d*<sub>6</sub> (400 MHz)

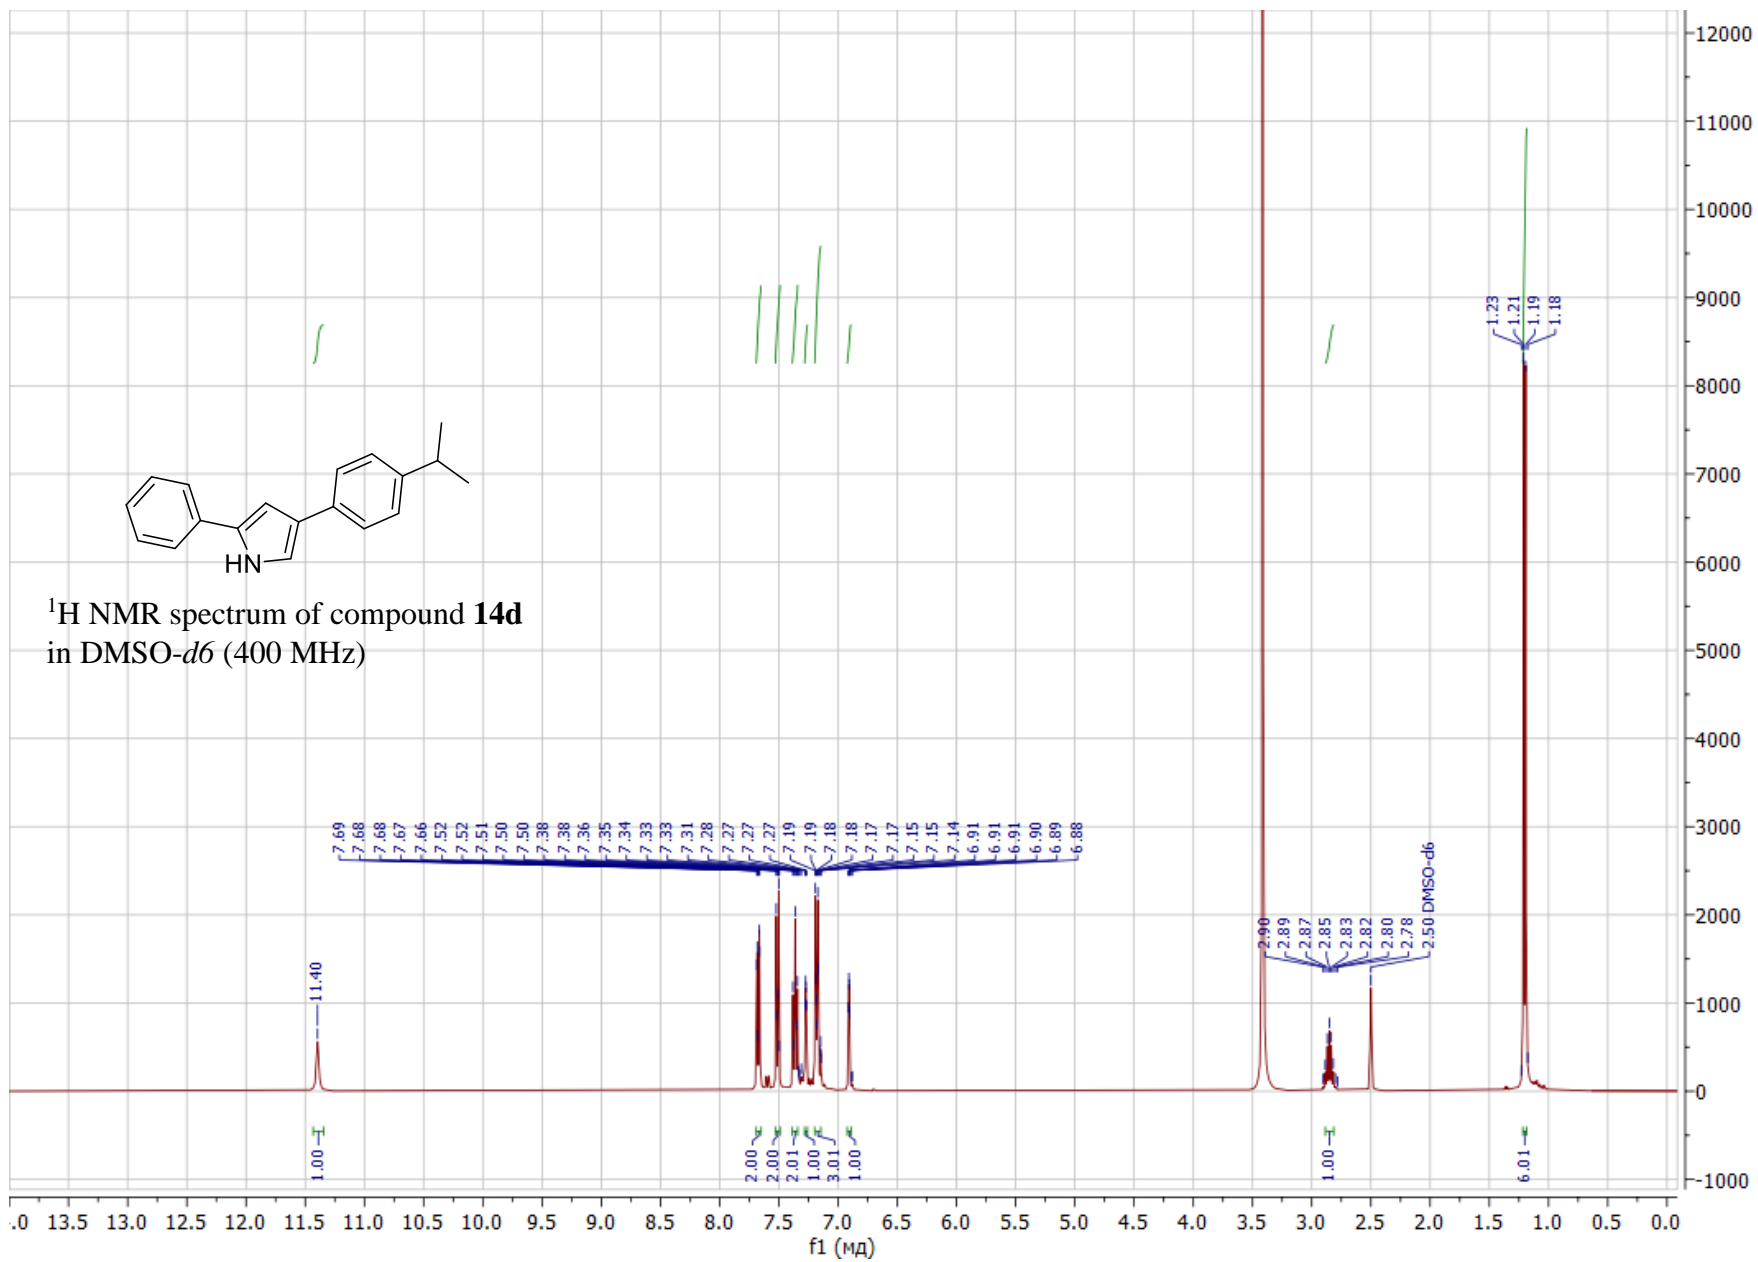

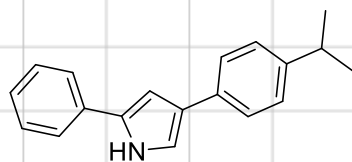

$^{13}\text{C}$   $\{^1\text{H}\}$  NMR spectrum of compound **14d**  
in DMSO-*d*<sub>6</sub> (101 MHz)

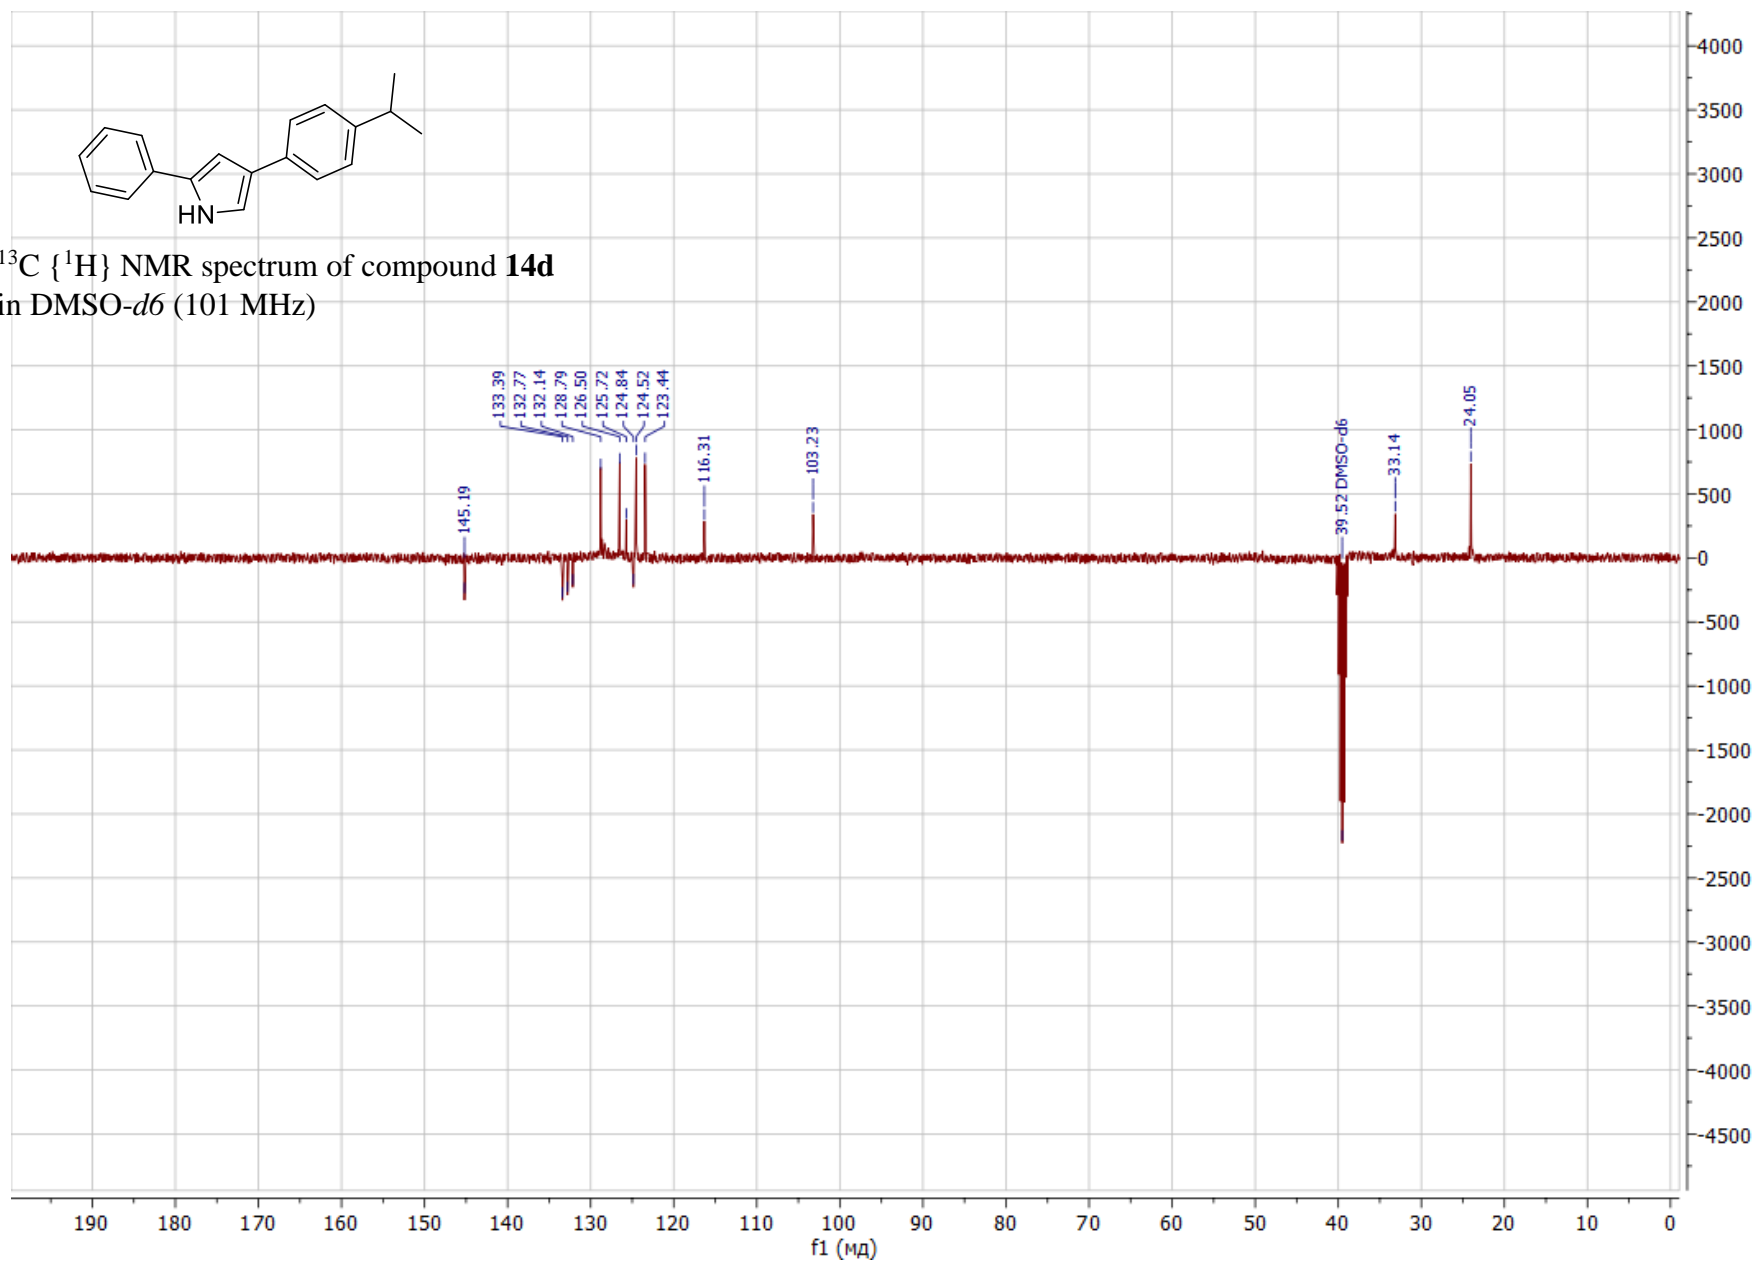

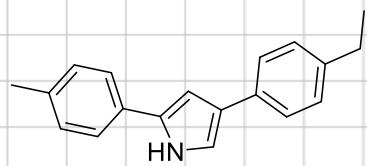

$^1\text{H}$  NMR spectrum of compound **14e**  
in DMSO-*d*<sub>6</sub> (400 MHz)

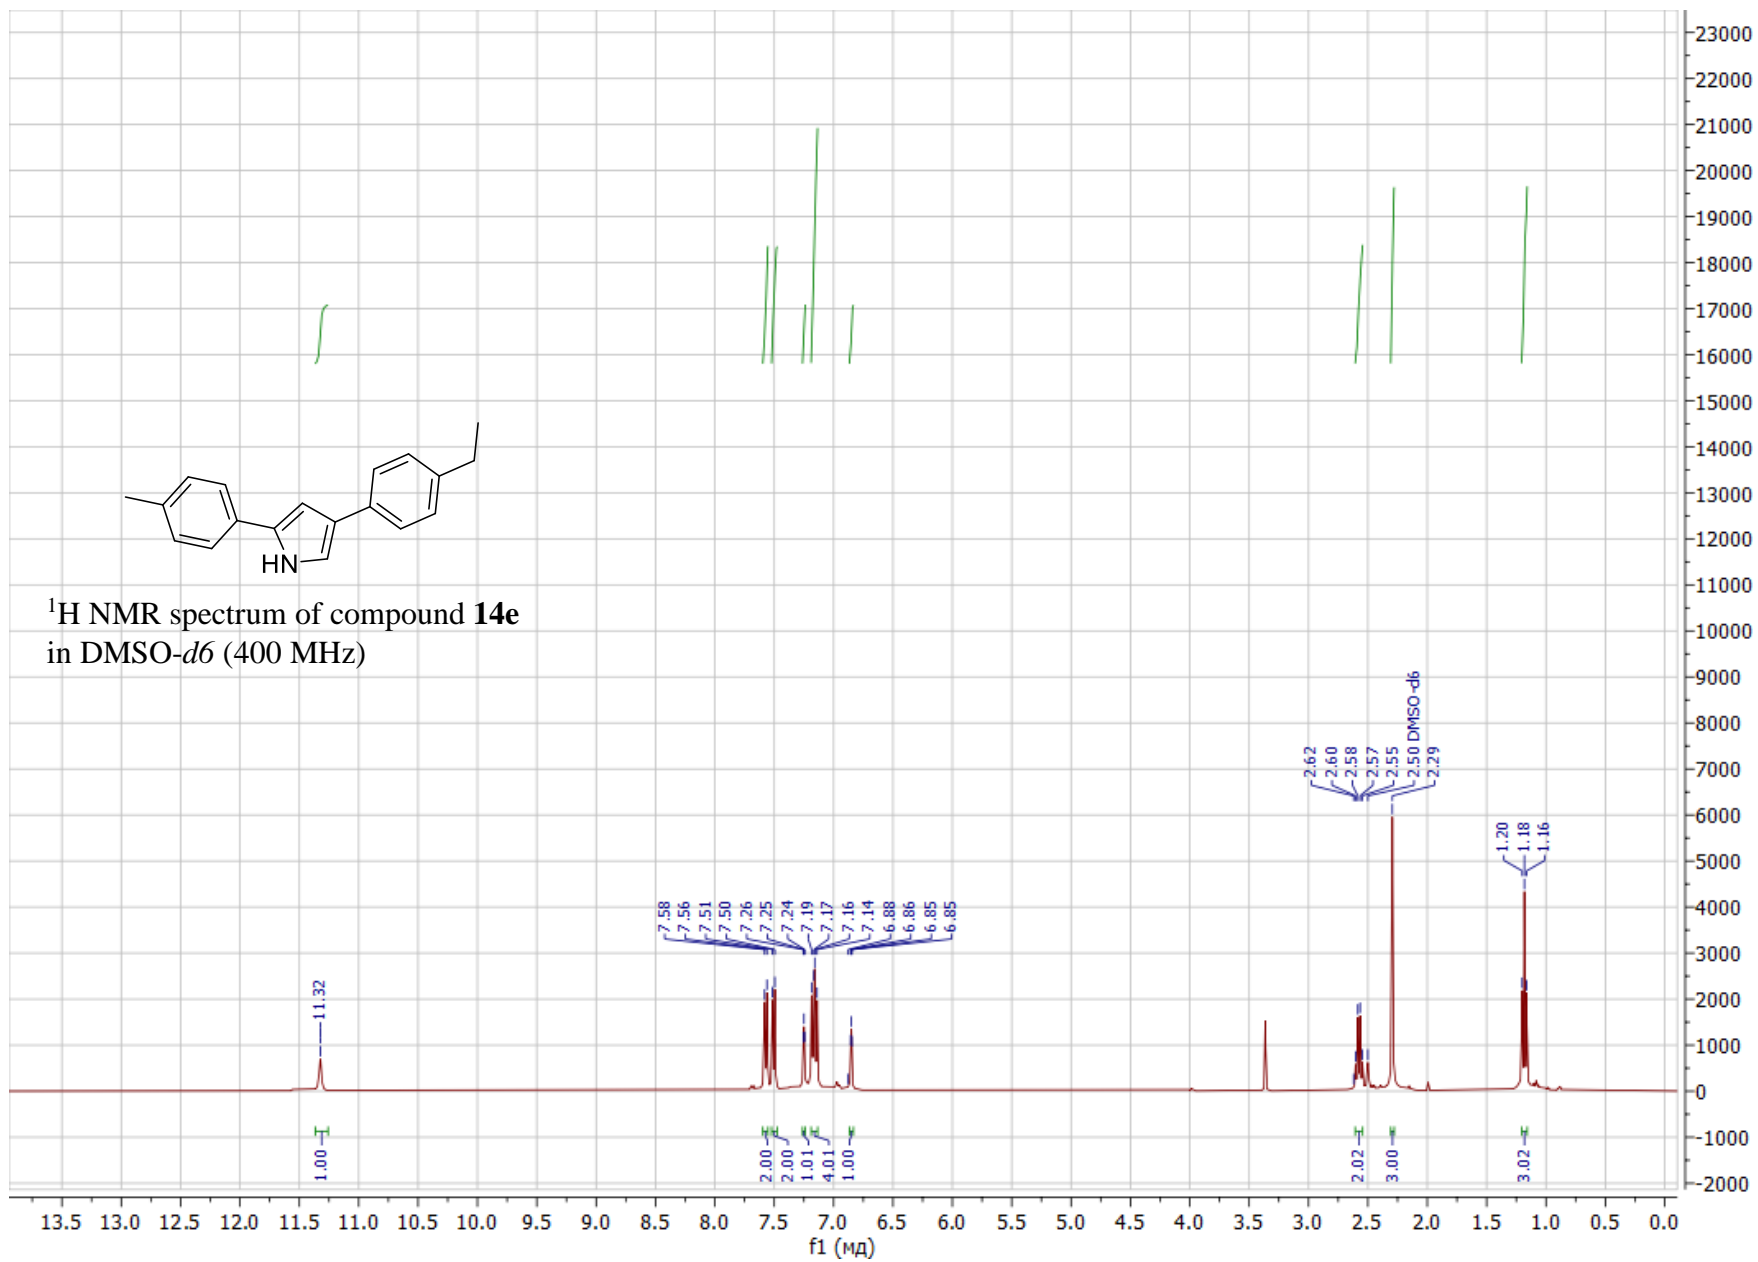

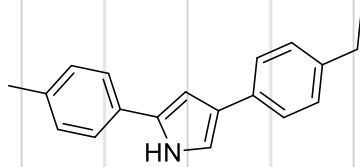

$^{13}\text{C}$   $\{^1\text{H}\}$  NMR spectrum of compound **14e**  
in DMSO-*d*<sub>6</sub> (101 MHz)

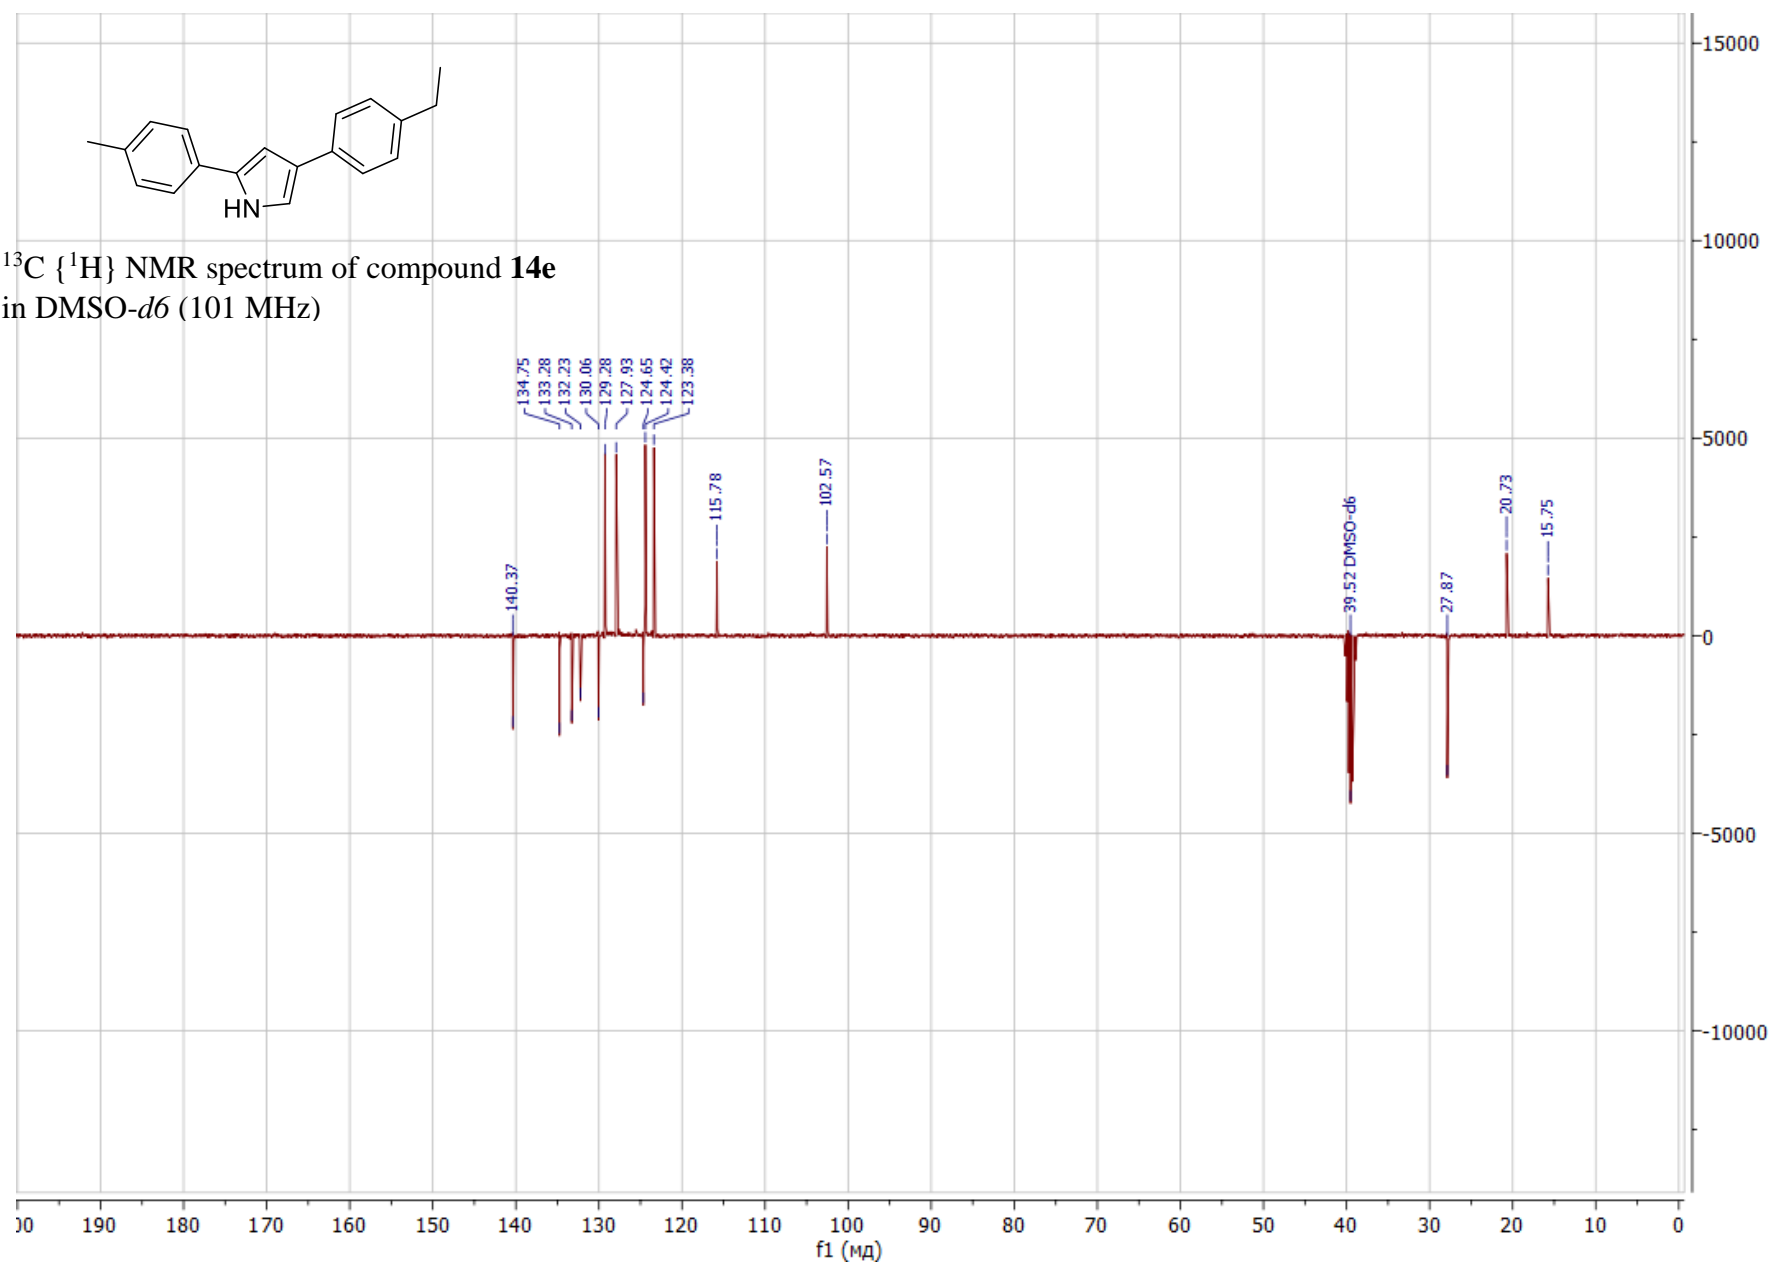



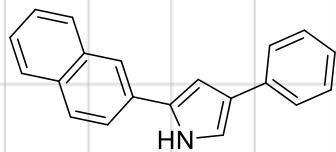

$^{13}\text{C}$   $\{^1\text{H}\}$  NMR spectrum of compound **14f**  
in DMSO-*d*<sub>6</sub> (101 MHz)

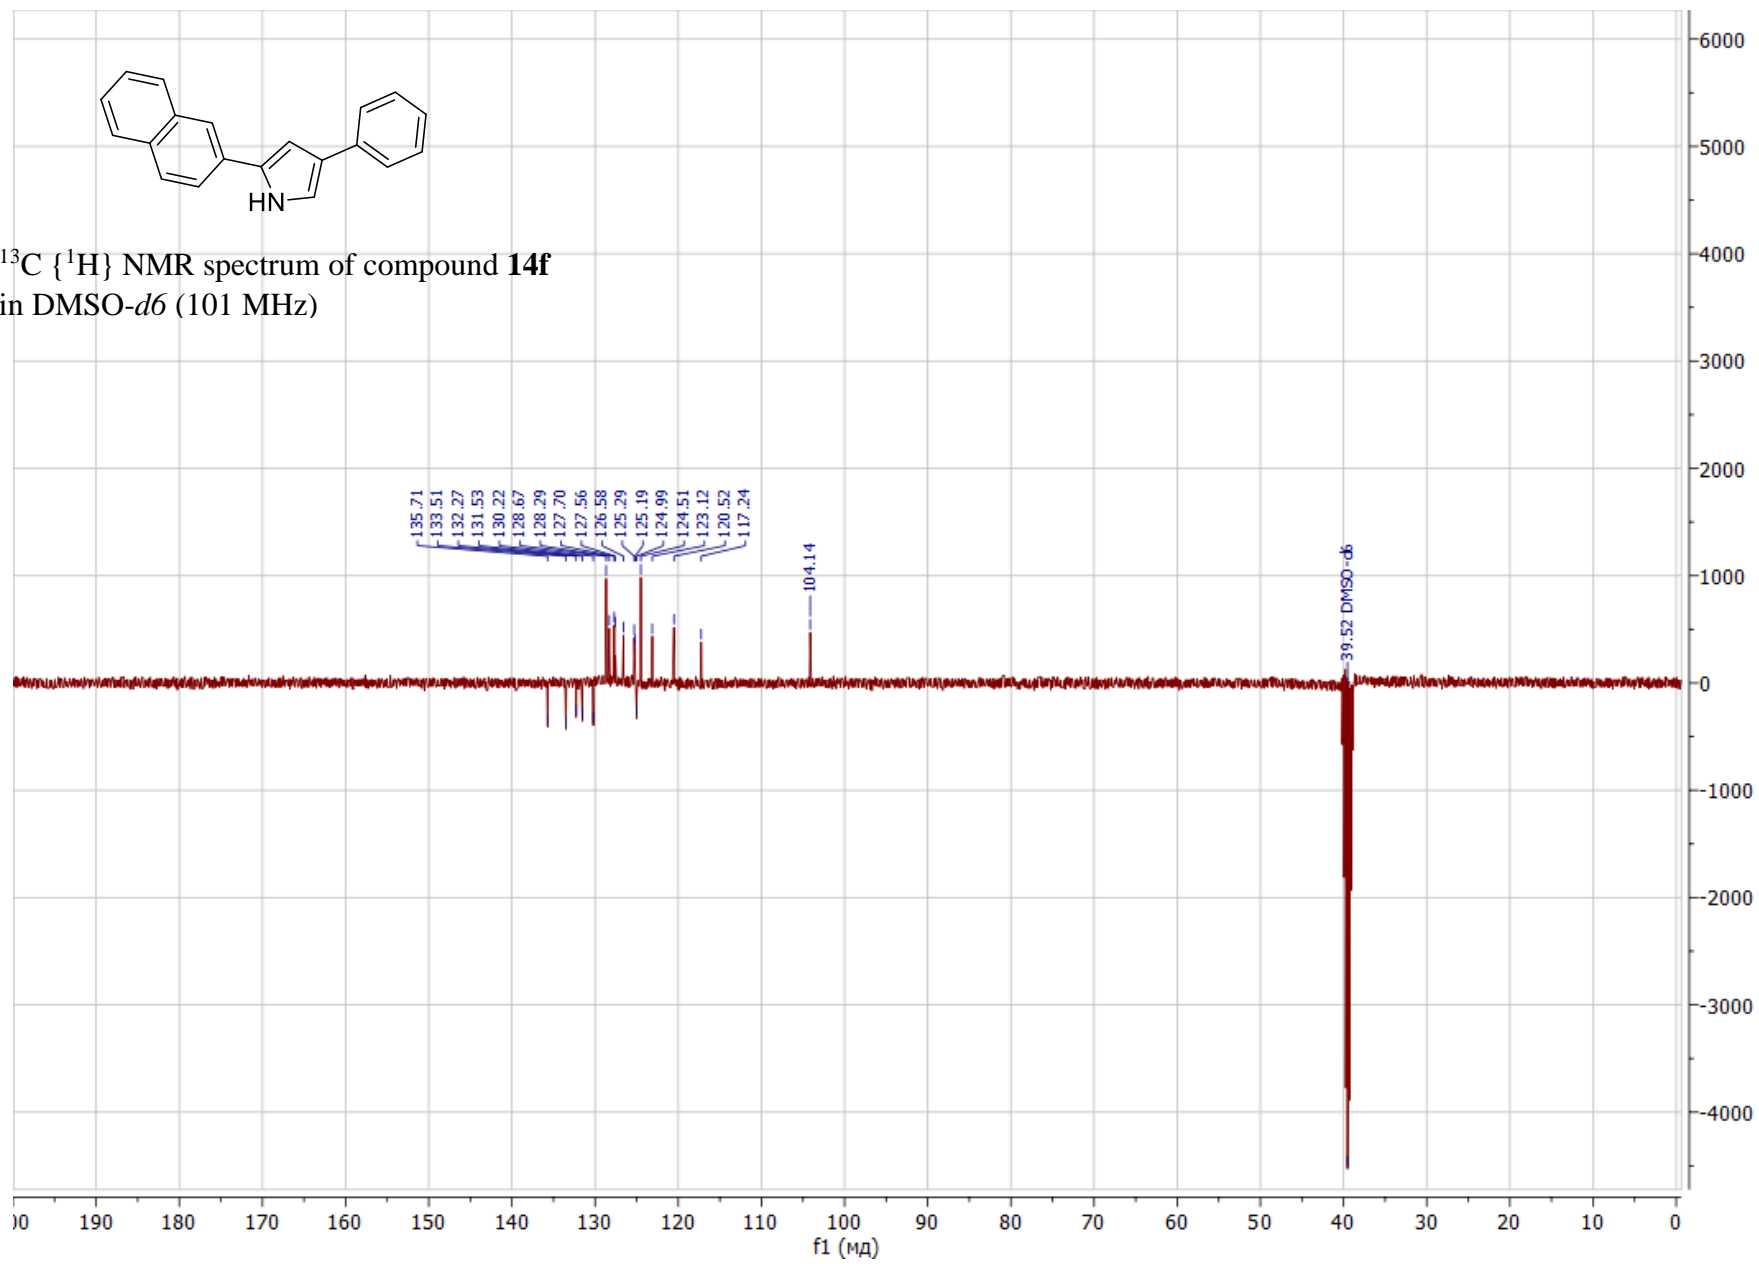

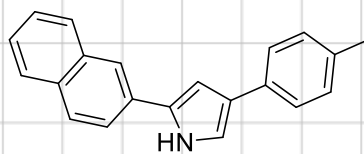

$^1\text{H}$  NMR spectrum of compound **14g**  
in DMSO-*d*<sub>6</sub> (400 MHz)

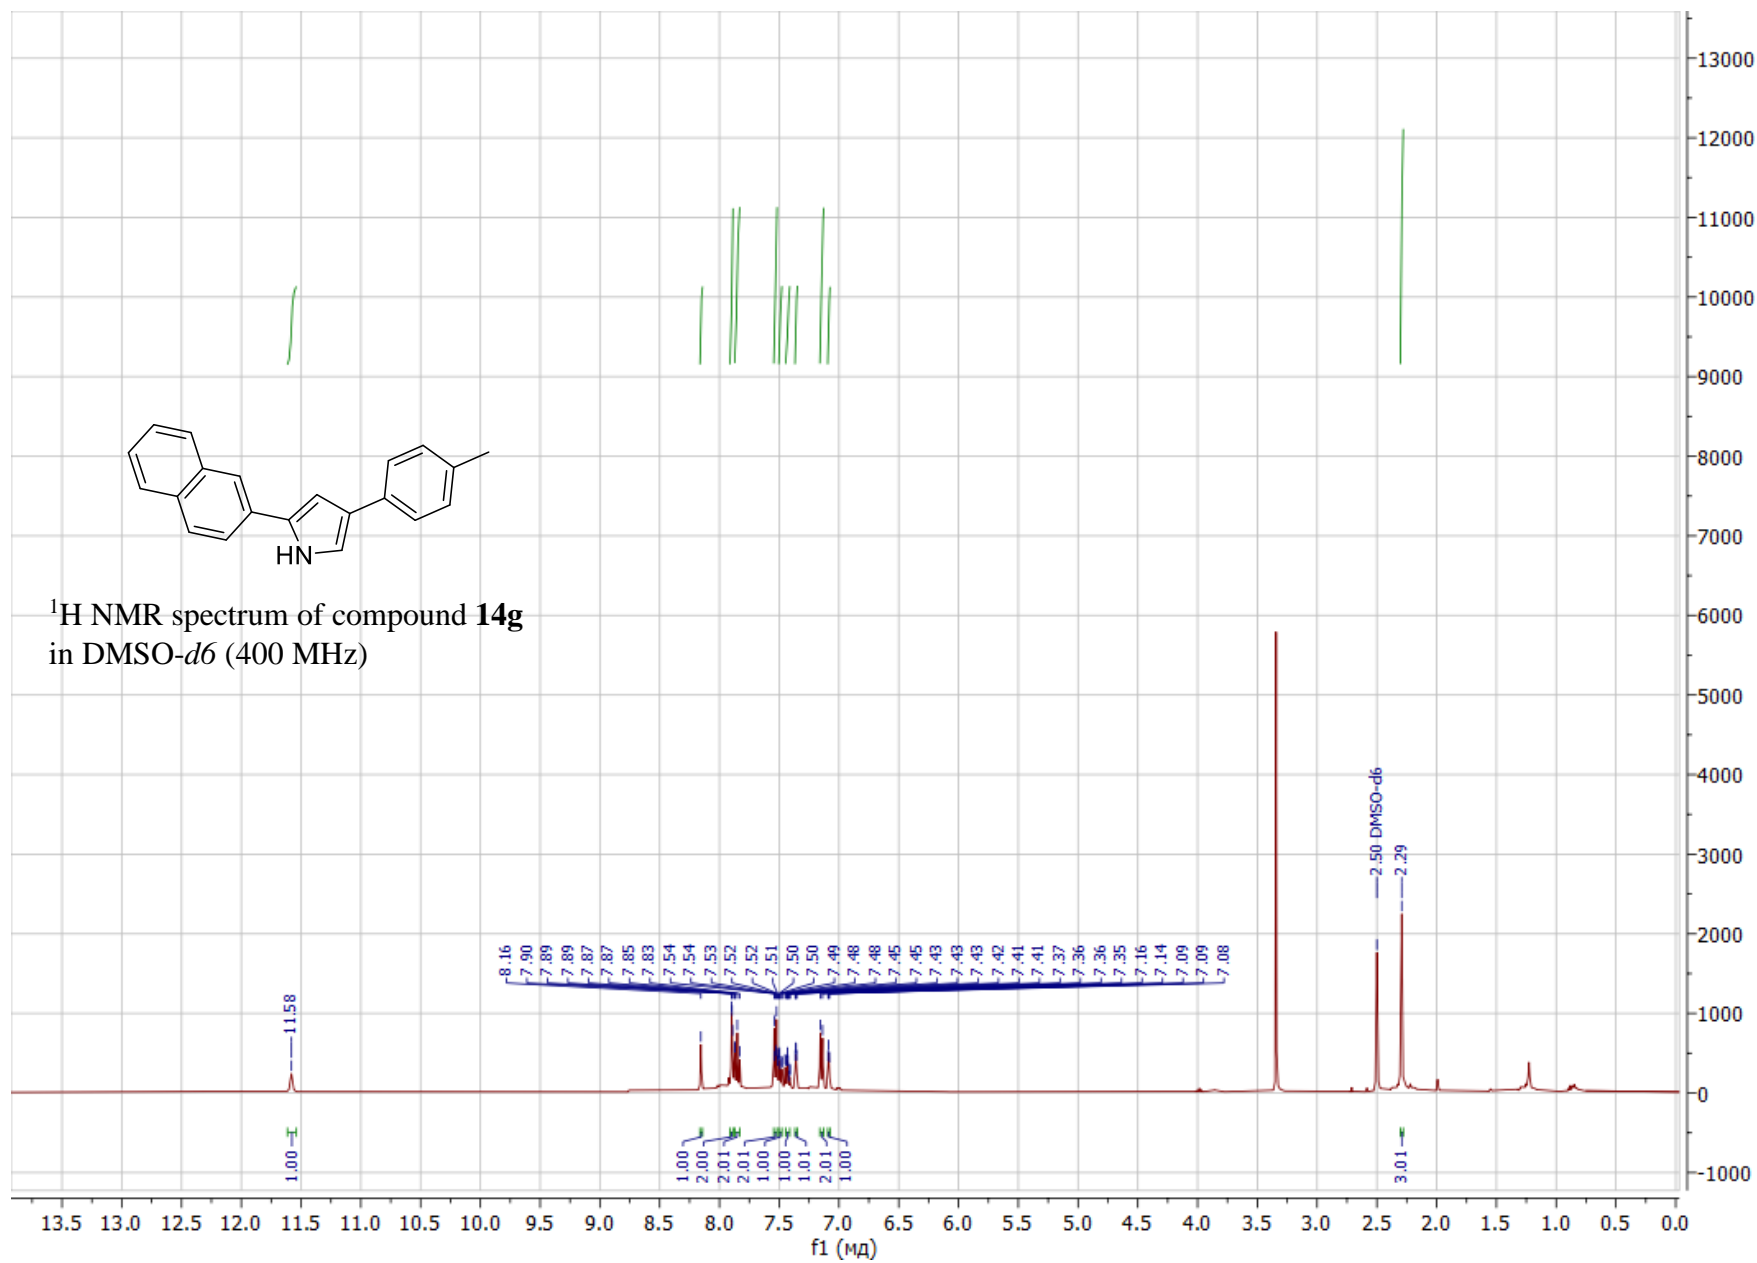

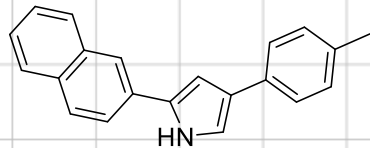

$^{13}\text{C}$   $\{^1\text{H}\}$  NMR spectrum of compound **14g**  
in DMSO-*d*<sub>6</sub> (101 MHz)

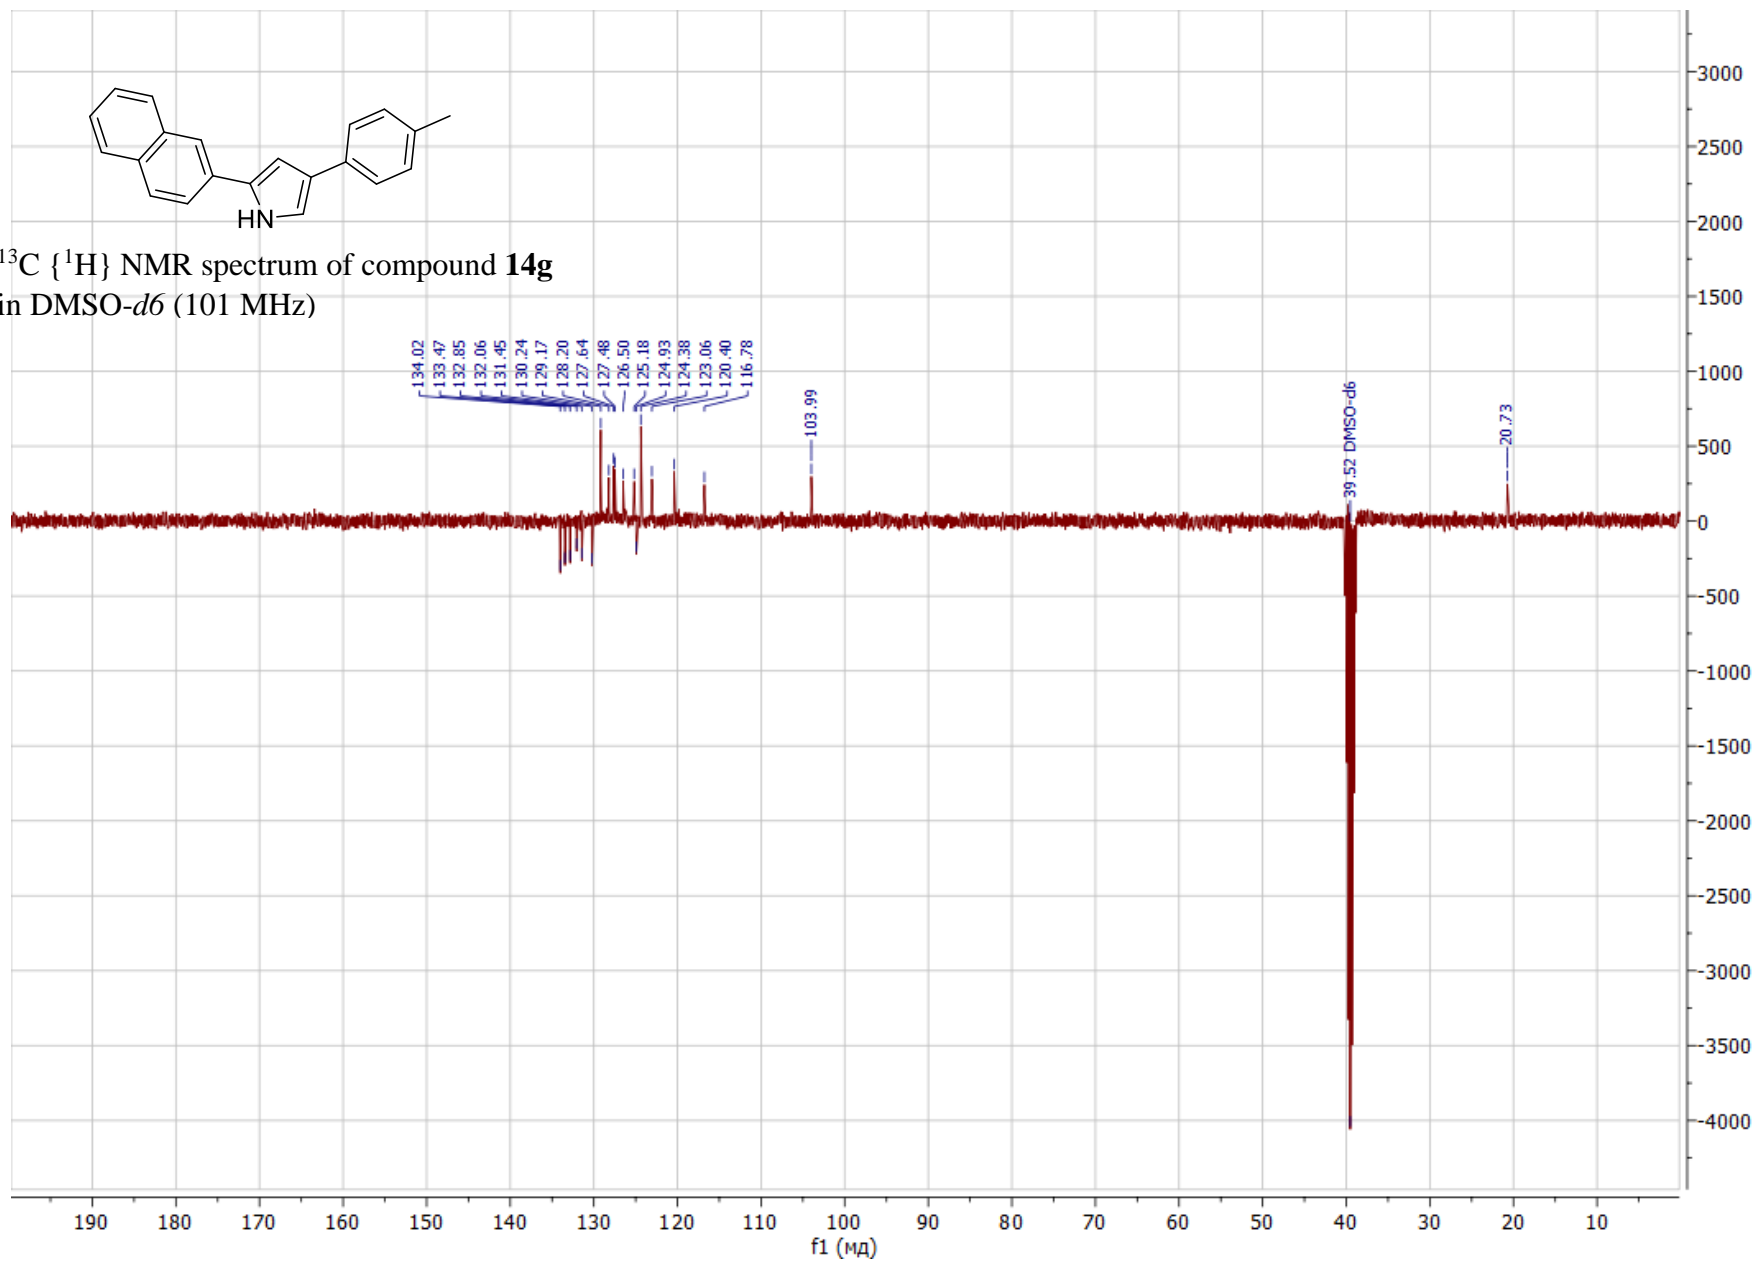

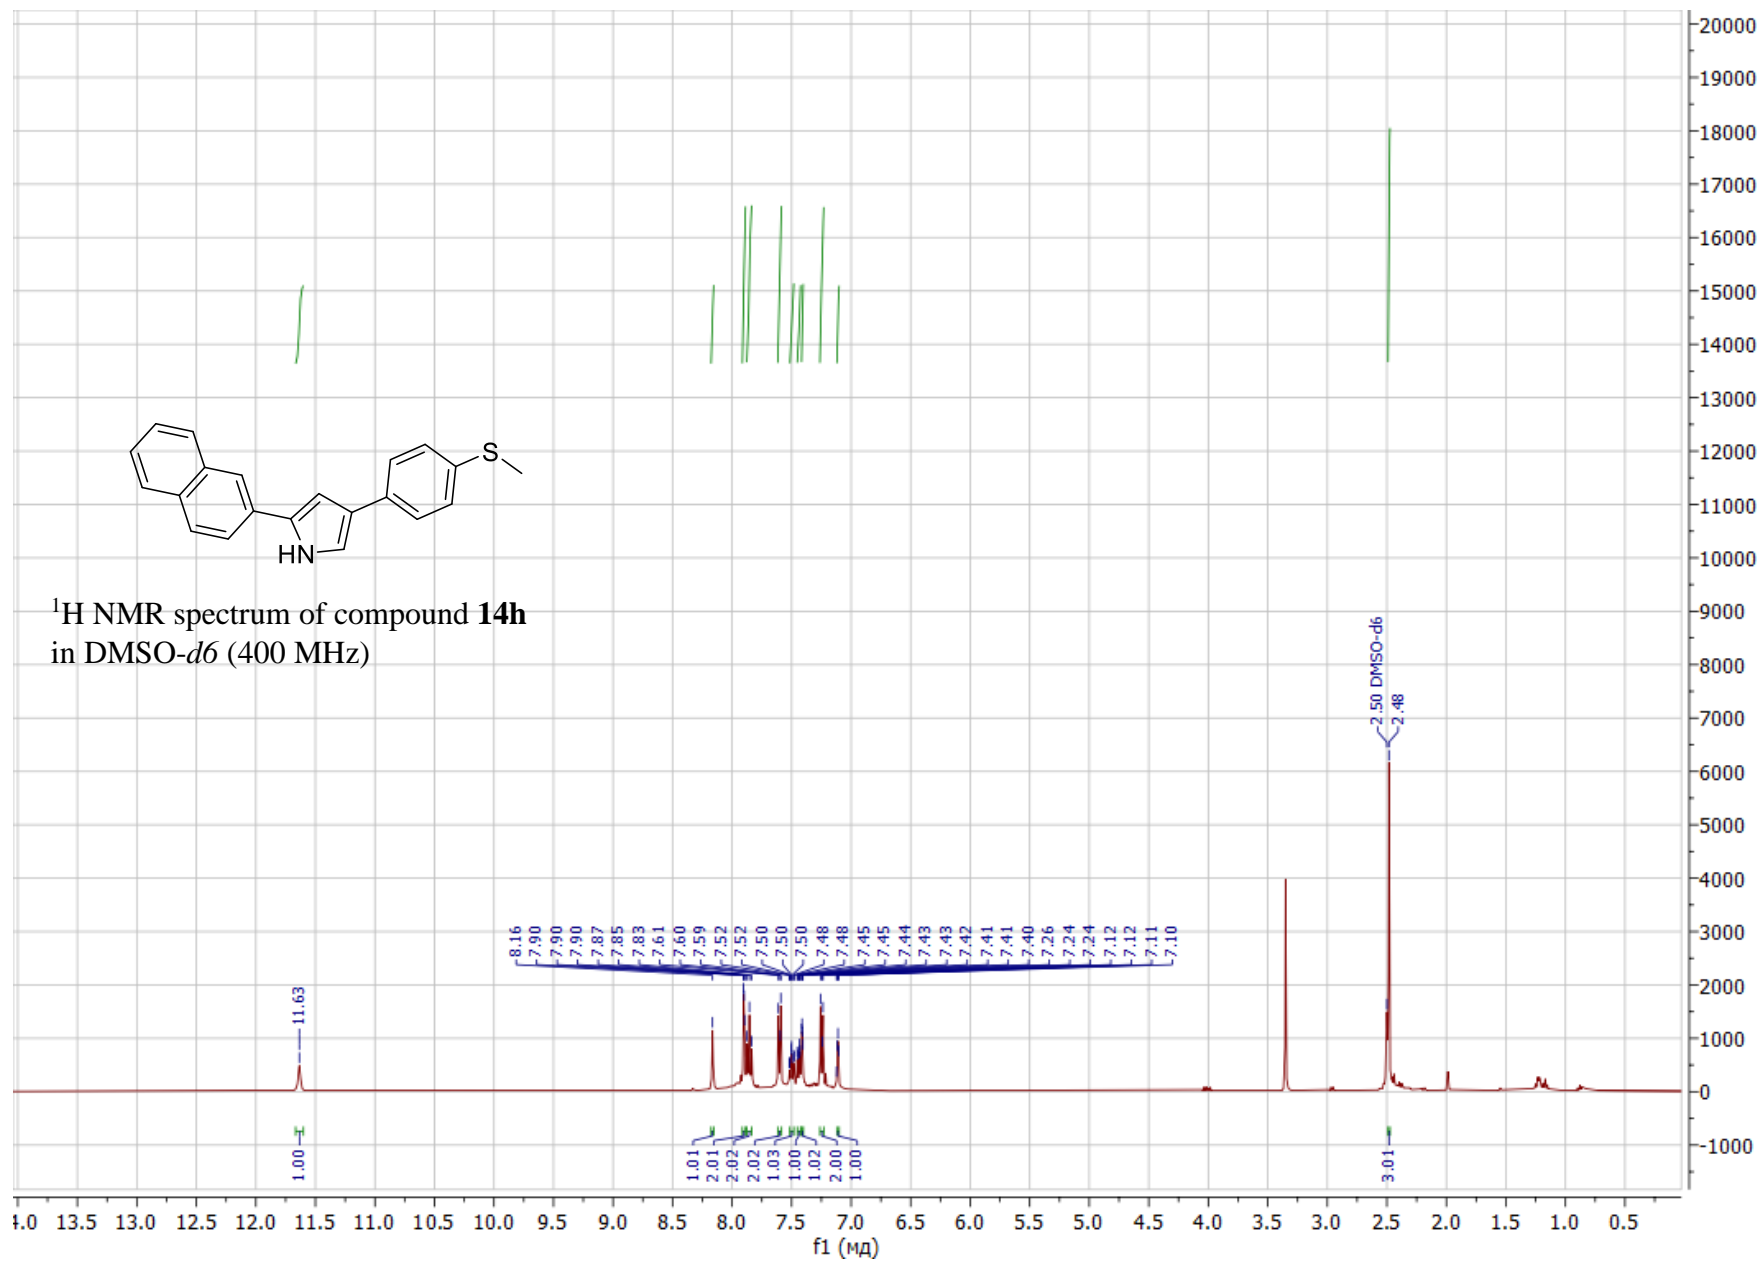

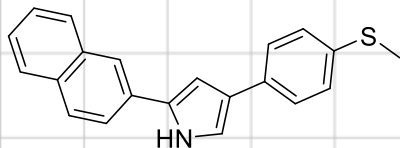

$^{13}\text{C}$   $\{^1\text{H}\}$  NMR spectrum of compound **14h**  
in DMSO-*d*<sub>6</sub> (101 MHz)

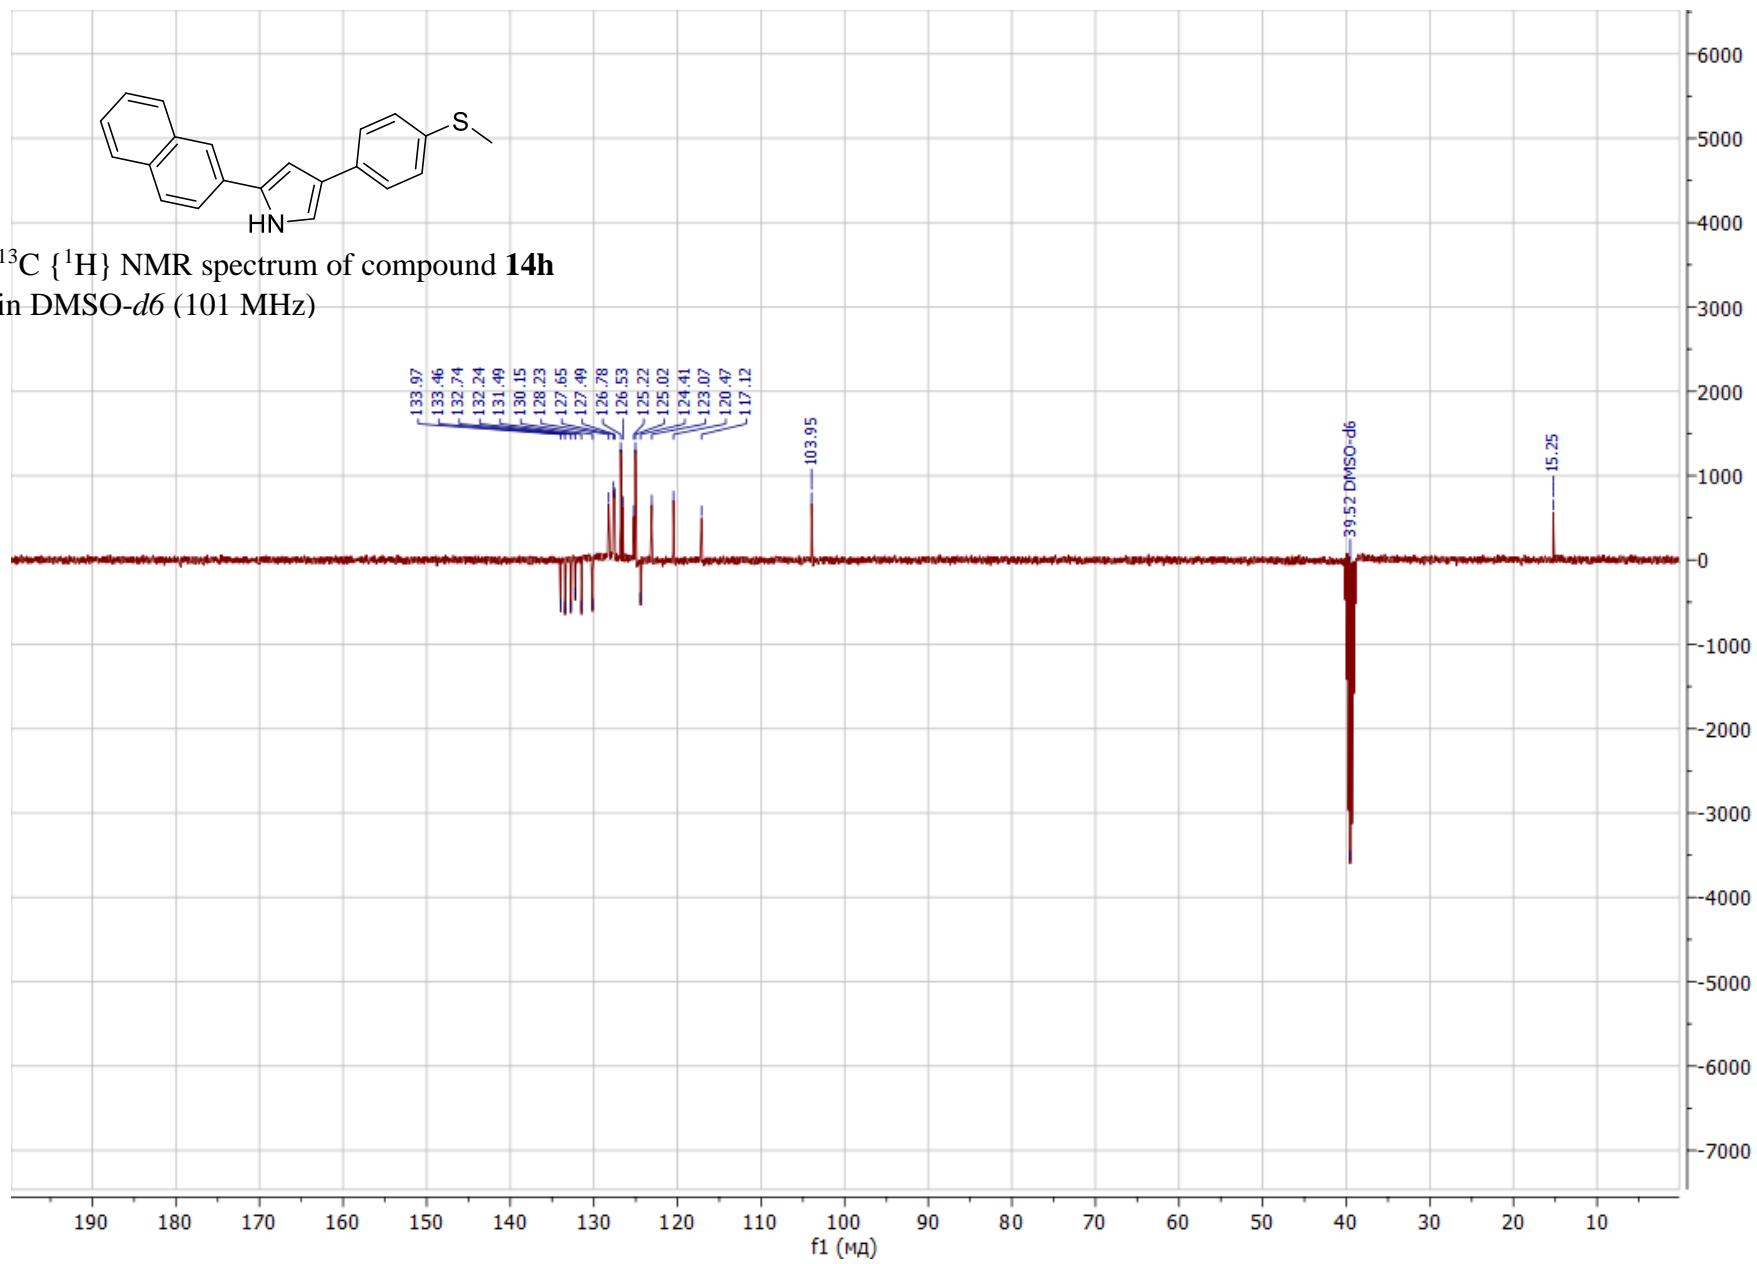

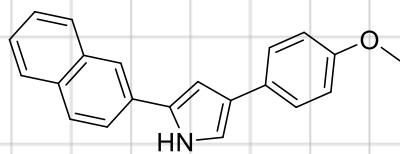

$^1\text{H}$  NMR spectrum of compound **14i**  
in DMSO- $d_6$  (400 MHz)

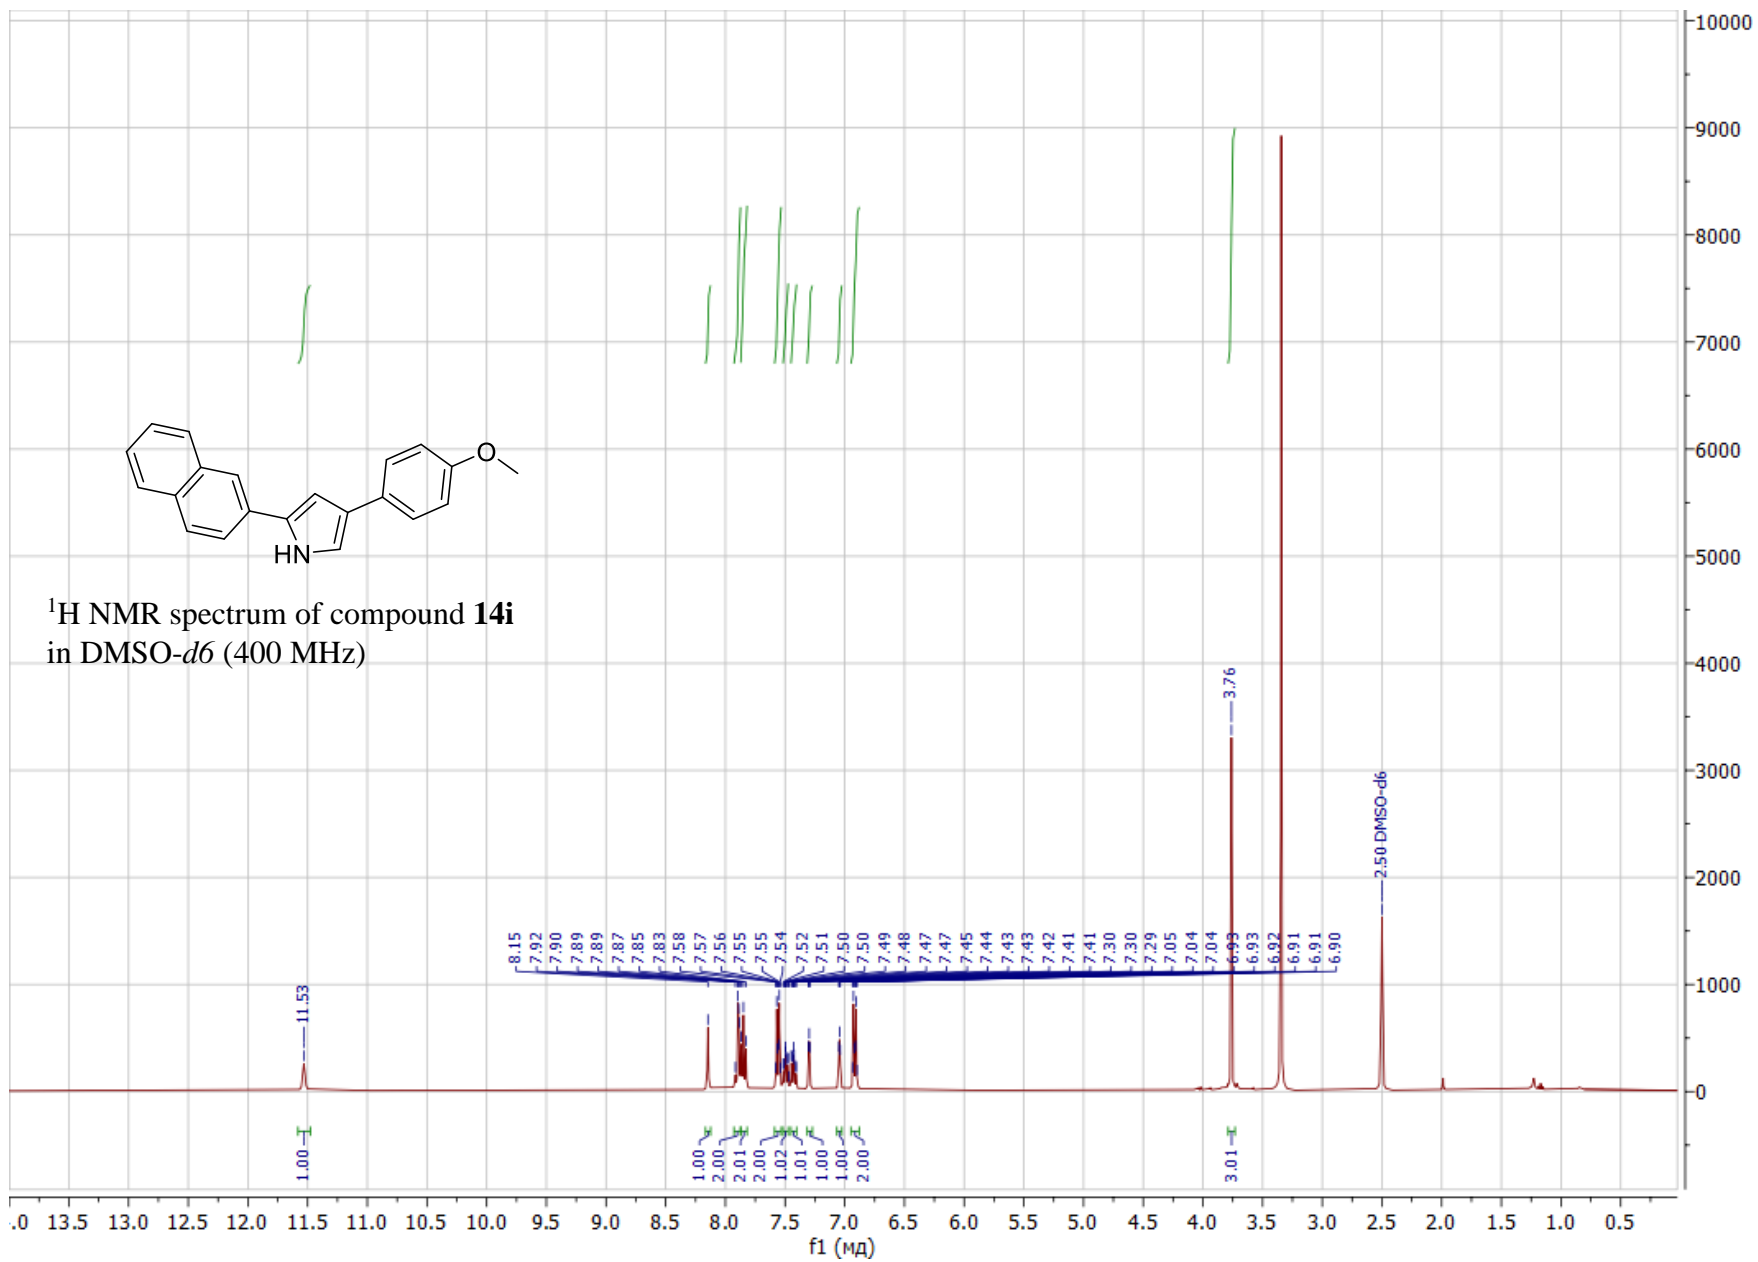

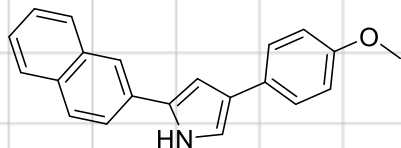

$^{13}\text{C}$   $\{^1\text{H}\}$  NMR spectrum of compound **14i**  
in DMSO-*d*<sub>6</sub> (101 MHz)

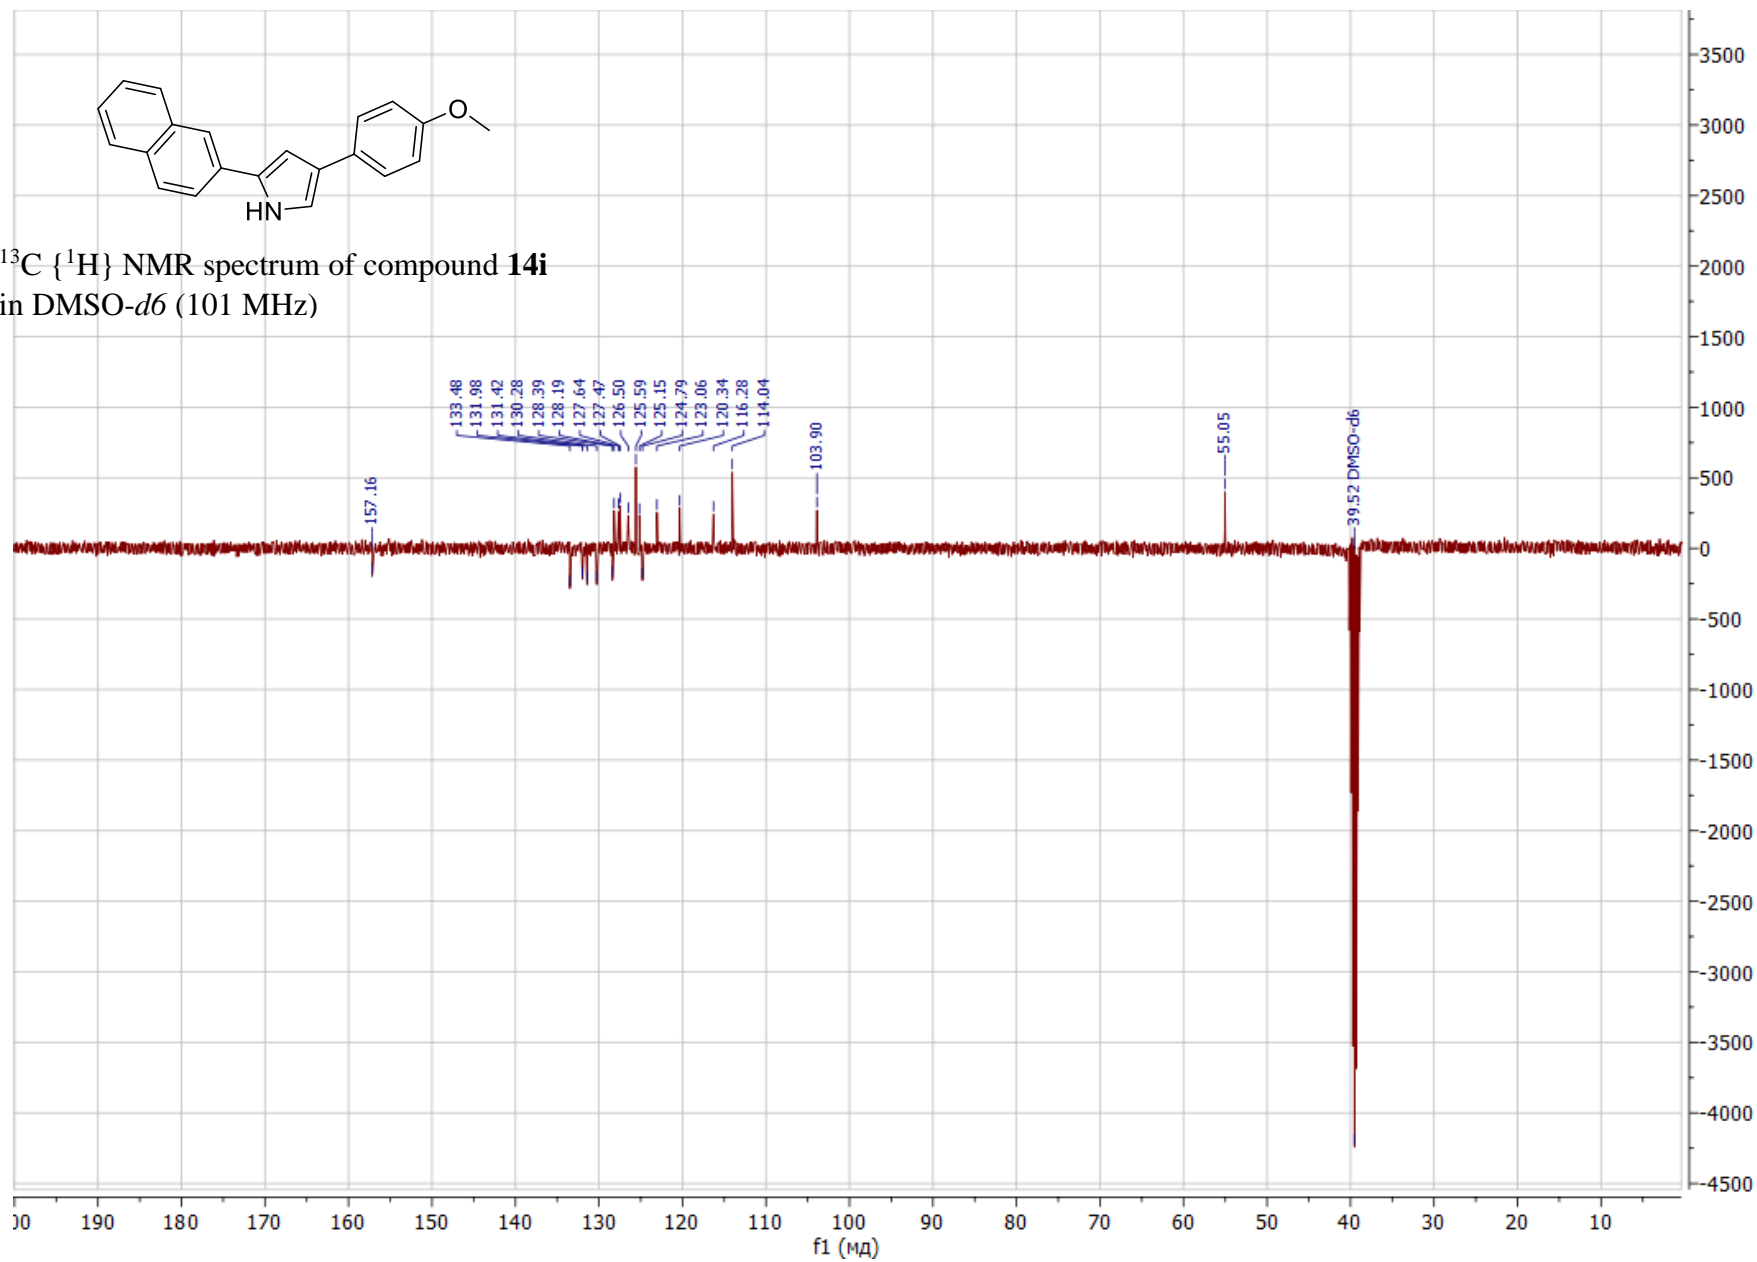

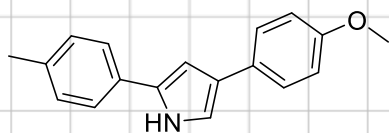

$^1\text{H}$  NMR spectrum of compound **14j**  
in DMSO-*d*<sub>6</sub> (400 MHz)

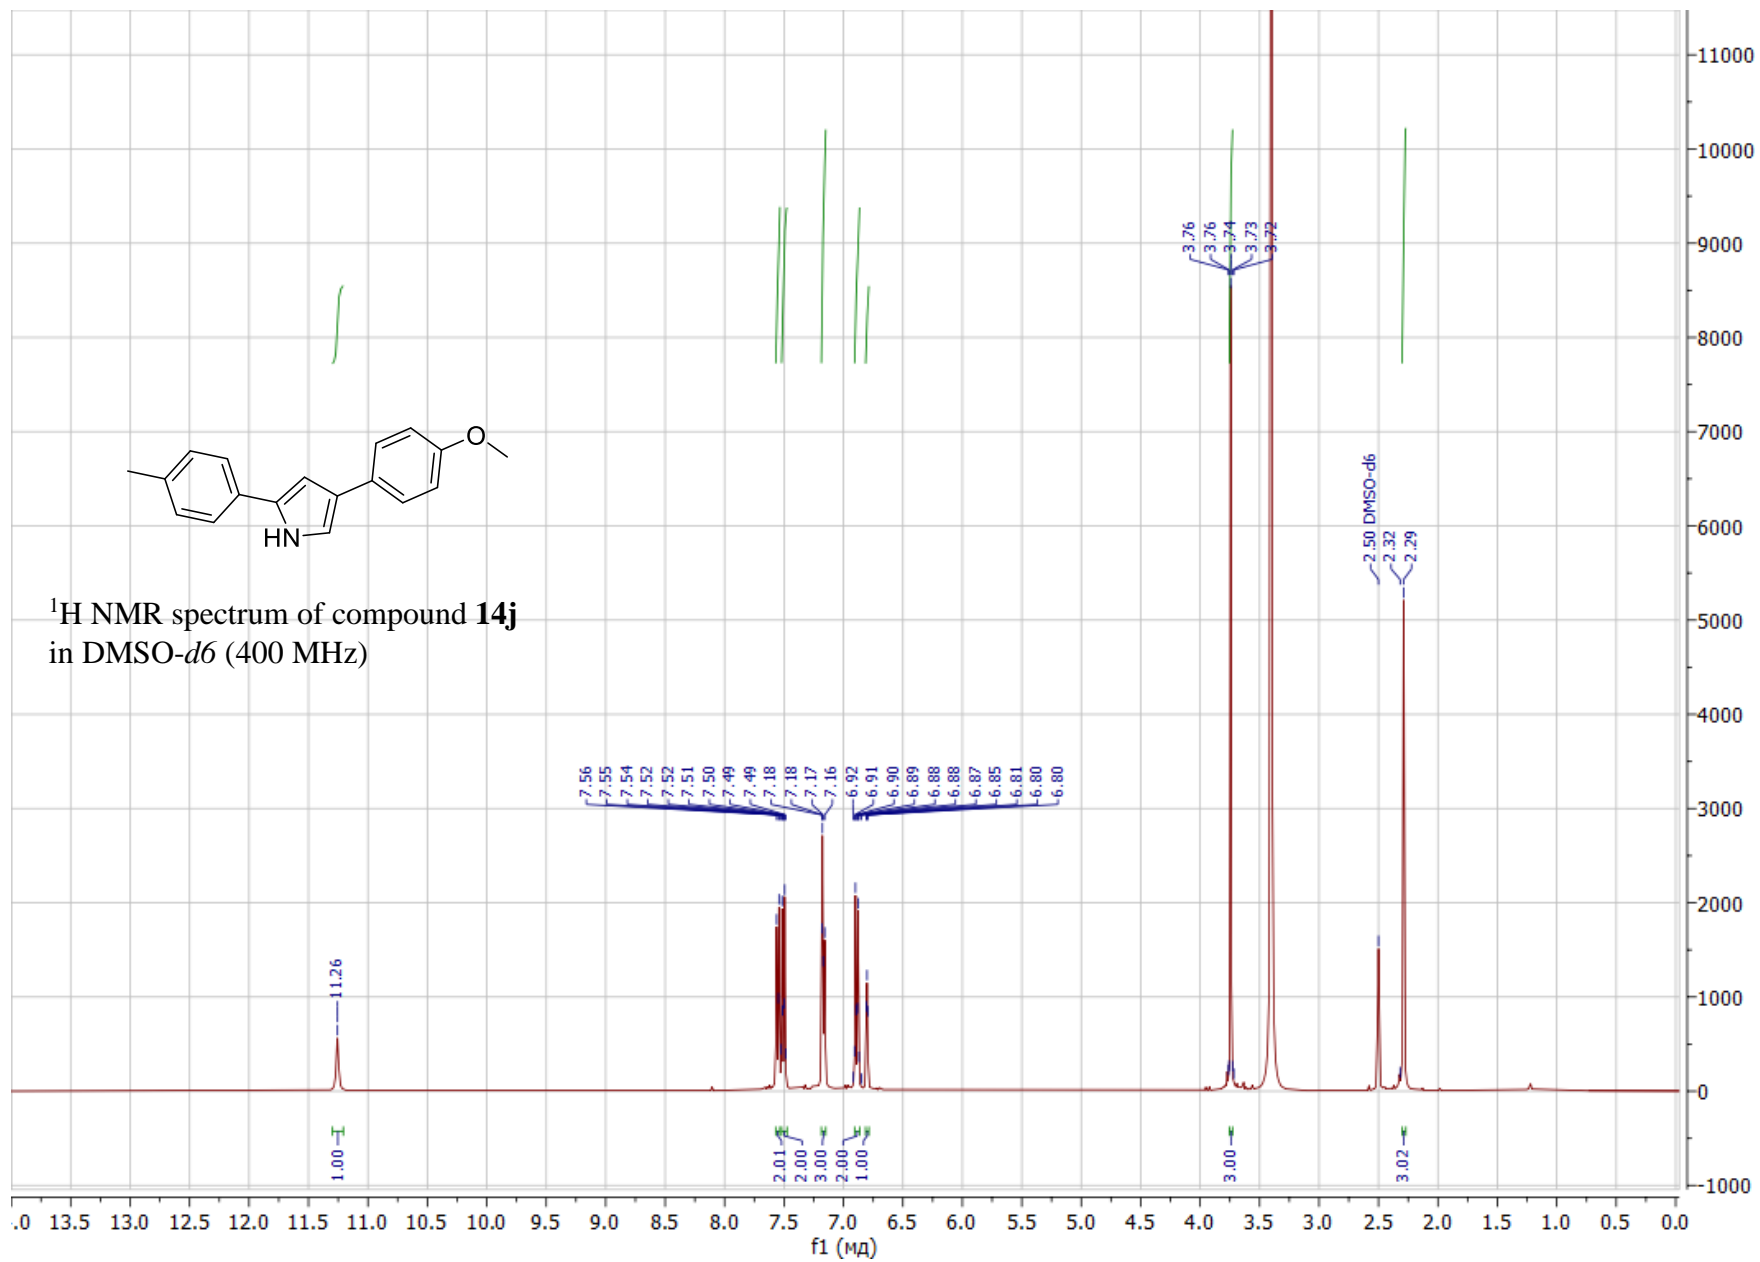

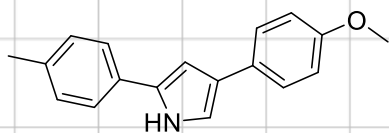

$^{13}\text{C}$   $\{^1\text{H}\}$  NMR spectrum of compound **14j**  
in DMSO-*d*<sub>6</sub> (101 MHz)

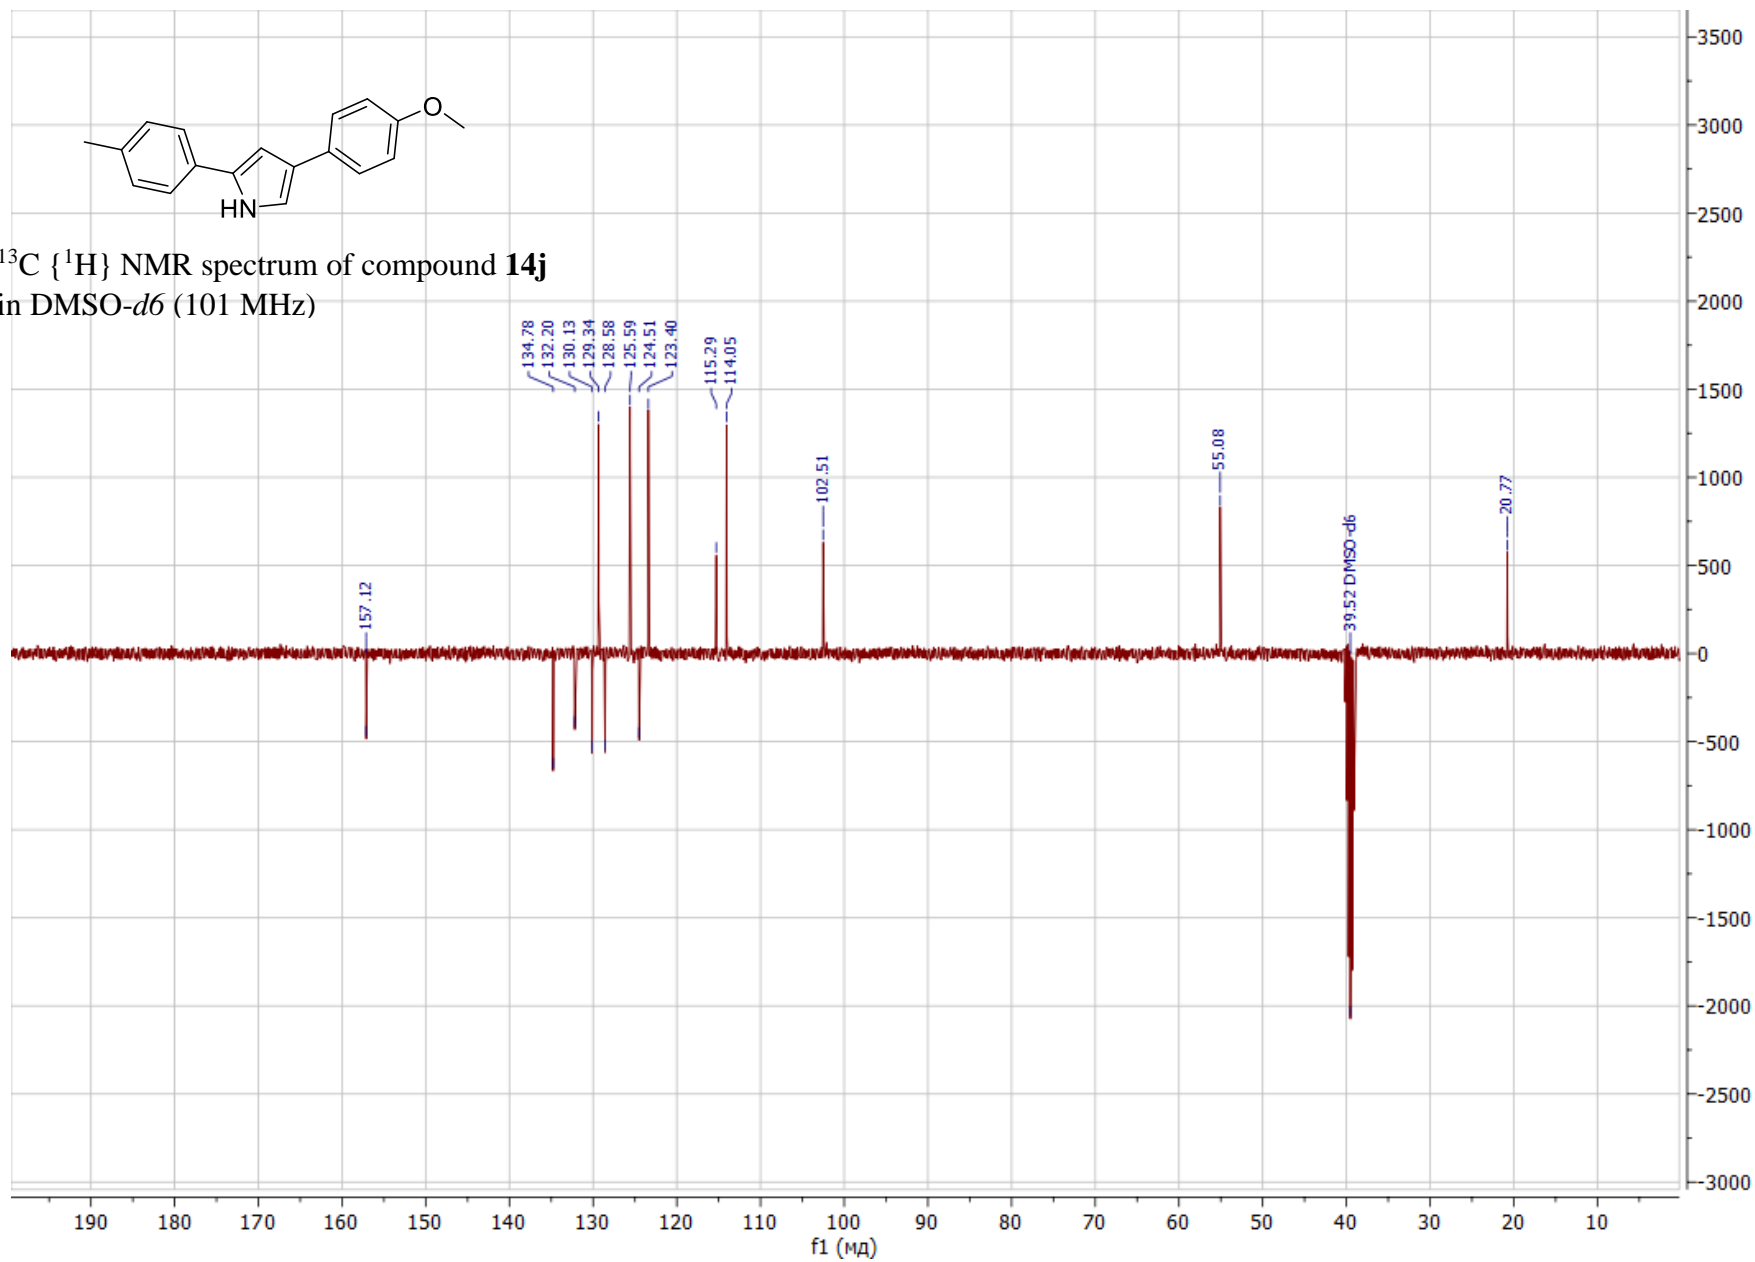

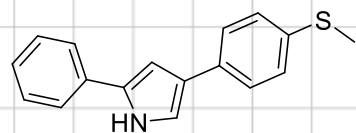

<sup>1</sup>H NMR spectrum of compound **14k**  
in DMSO-*d*<sub>6</sub> (400 MHz)

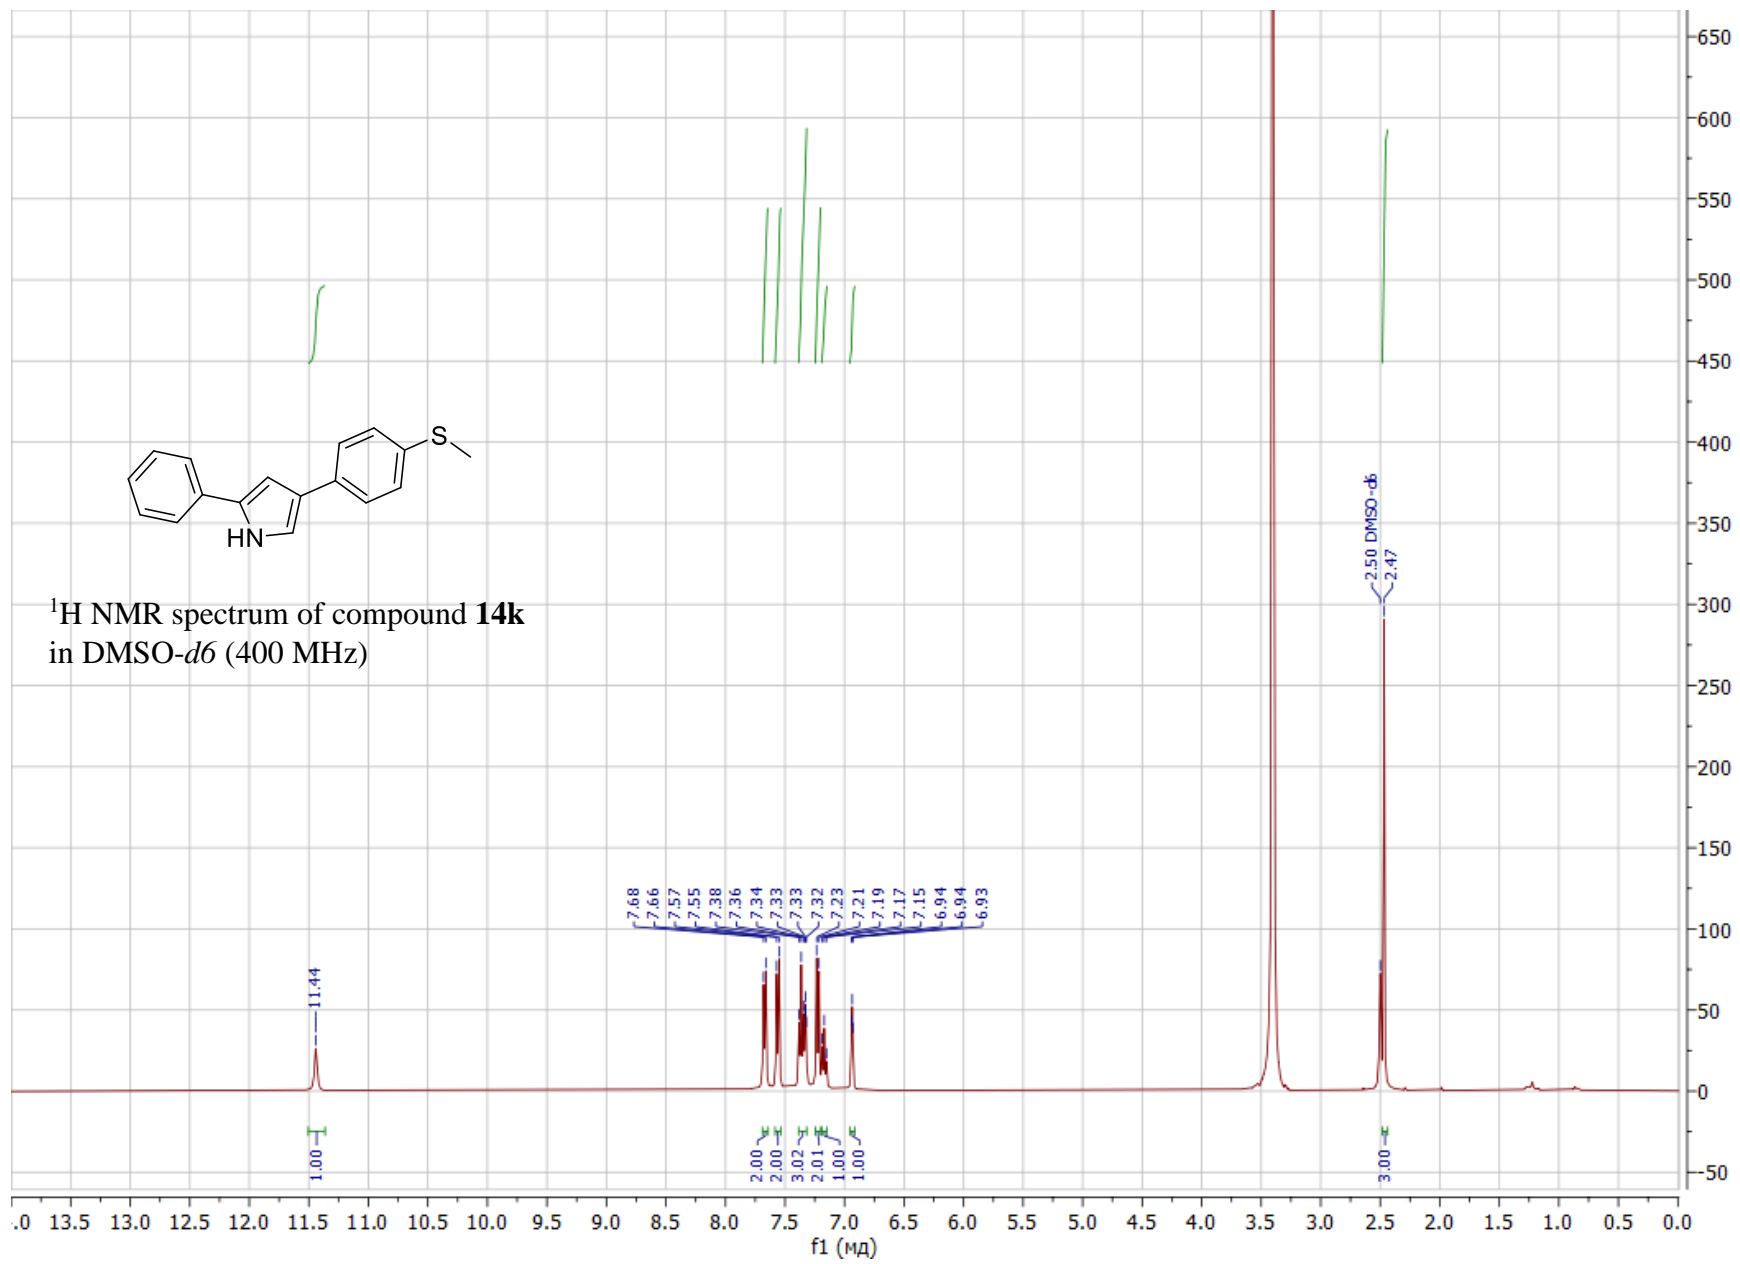

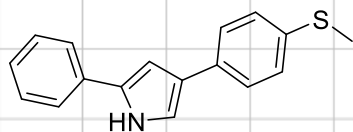

$^{13}\text{C}$   $\{^1\text{H}\}$  NMR spectrum of compound **14k**  
in DMSO-*d*<sub>6</sub> (101 MHz)

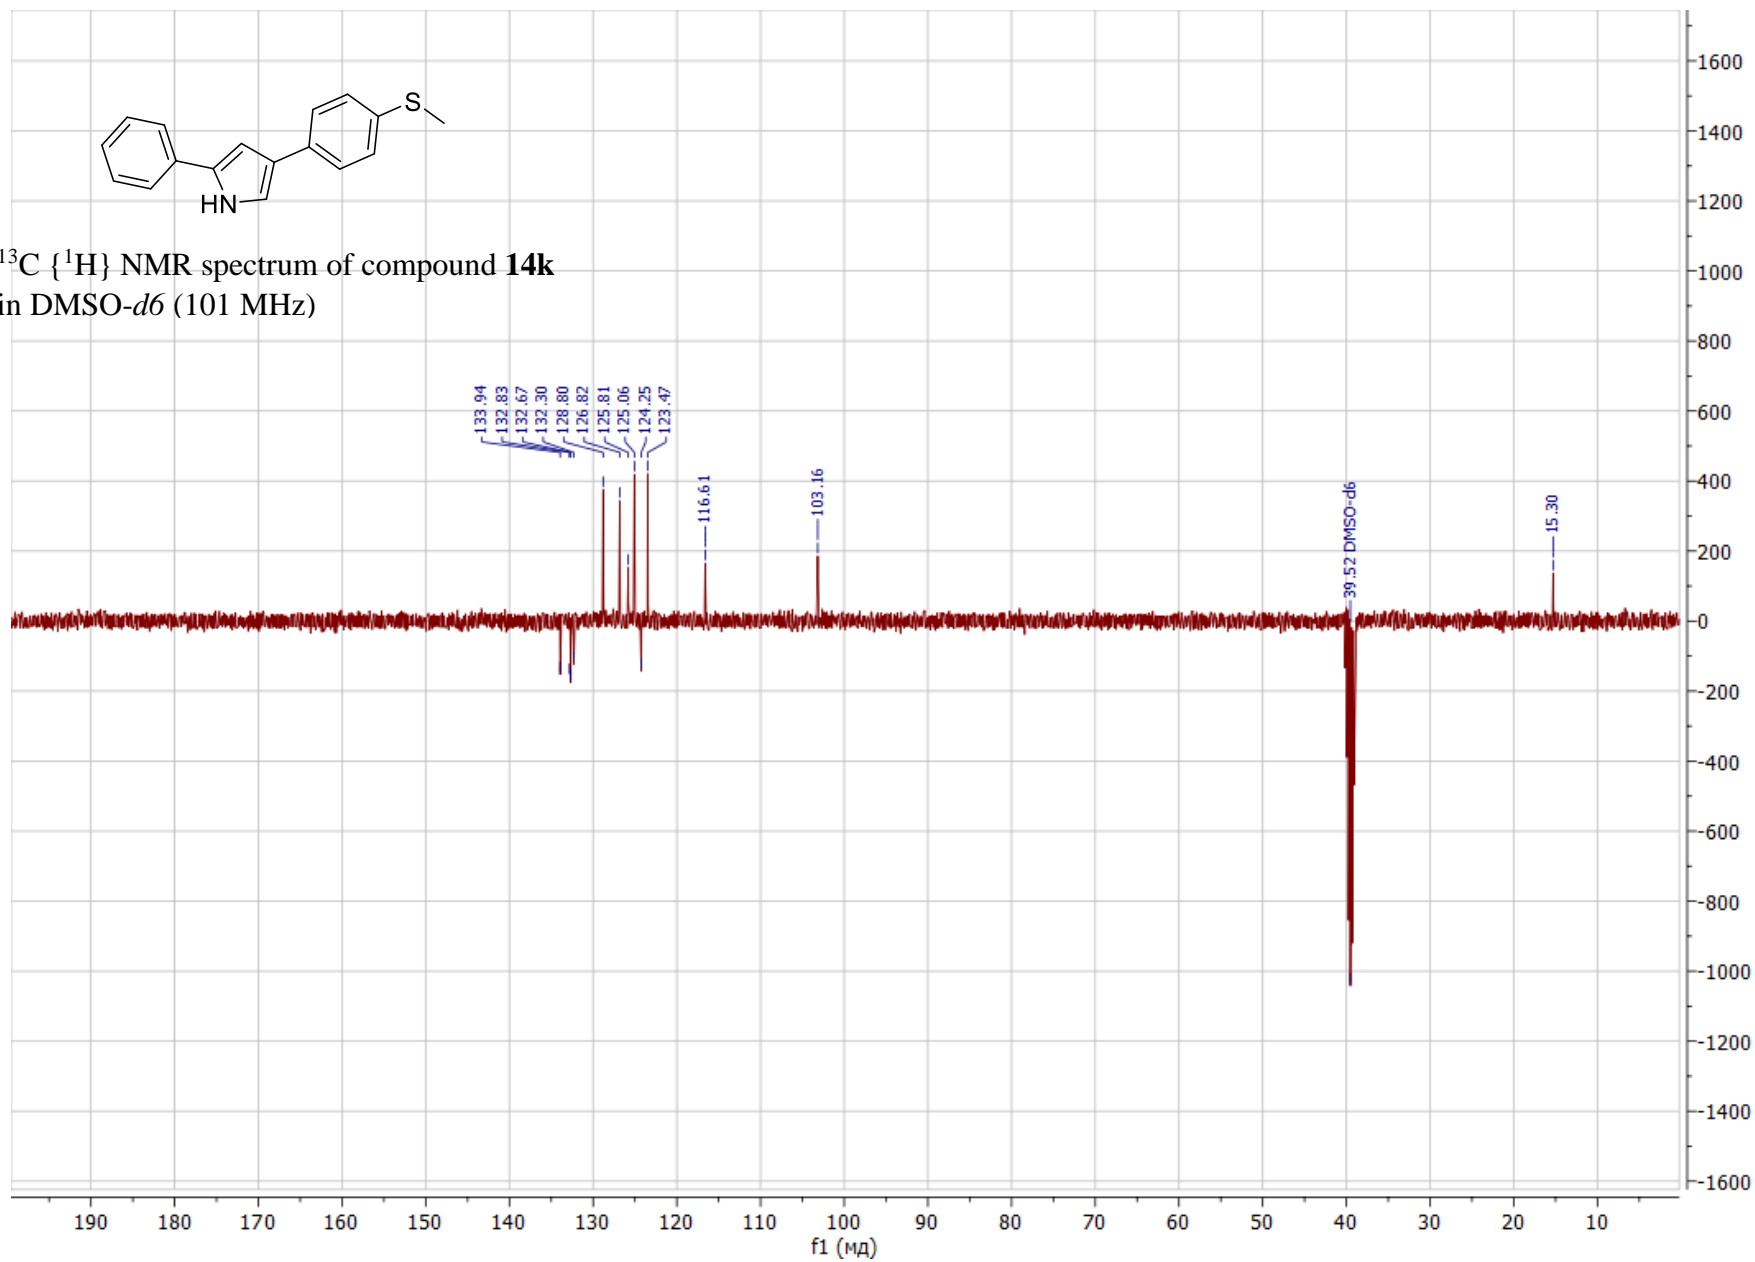

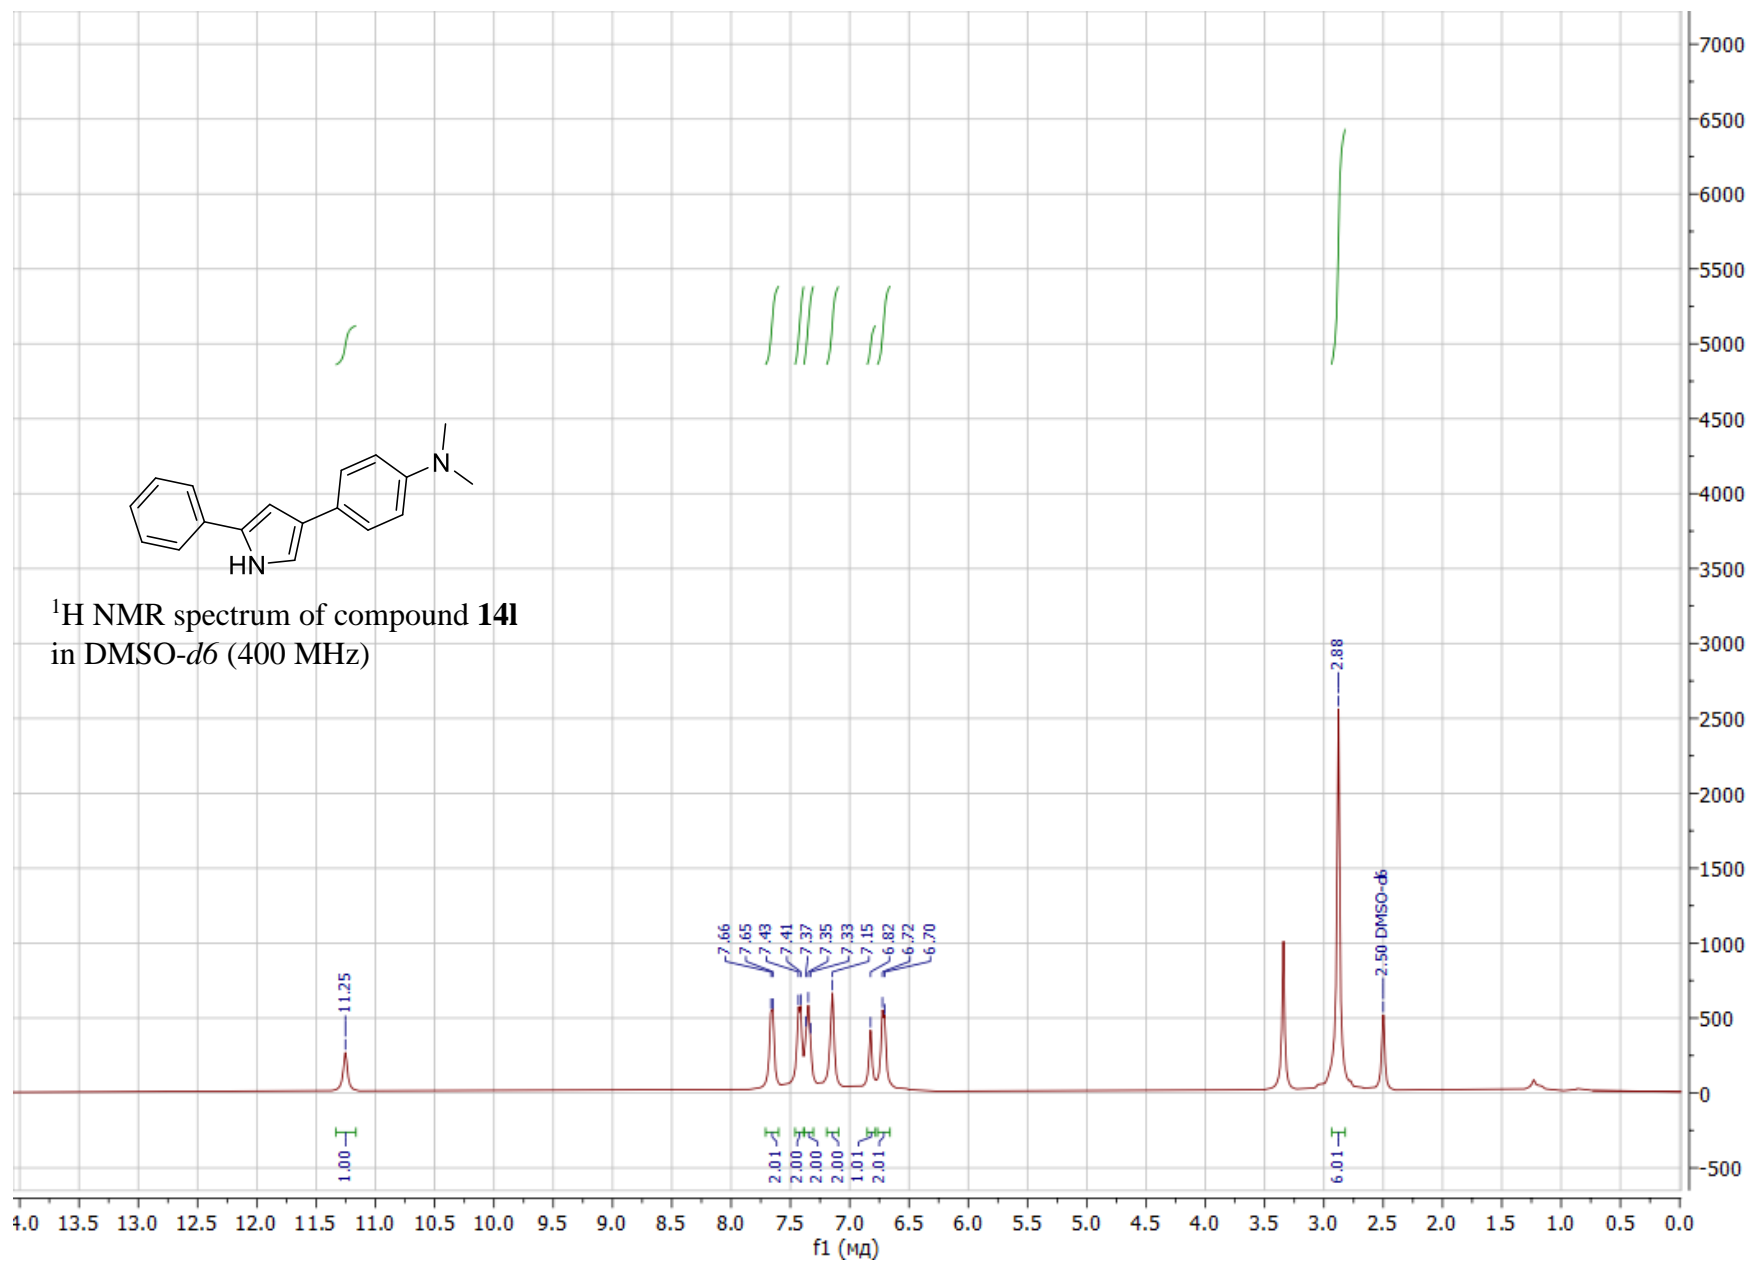

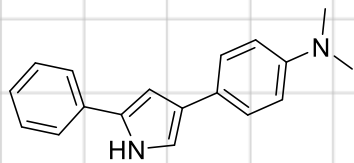

$^{13}\text{C}$   $\{^1\text{H}\}$  NMR spectrum of compound **14I**  
in DMSO-*d*<sub>6</sub> (101 MHz)

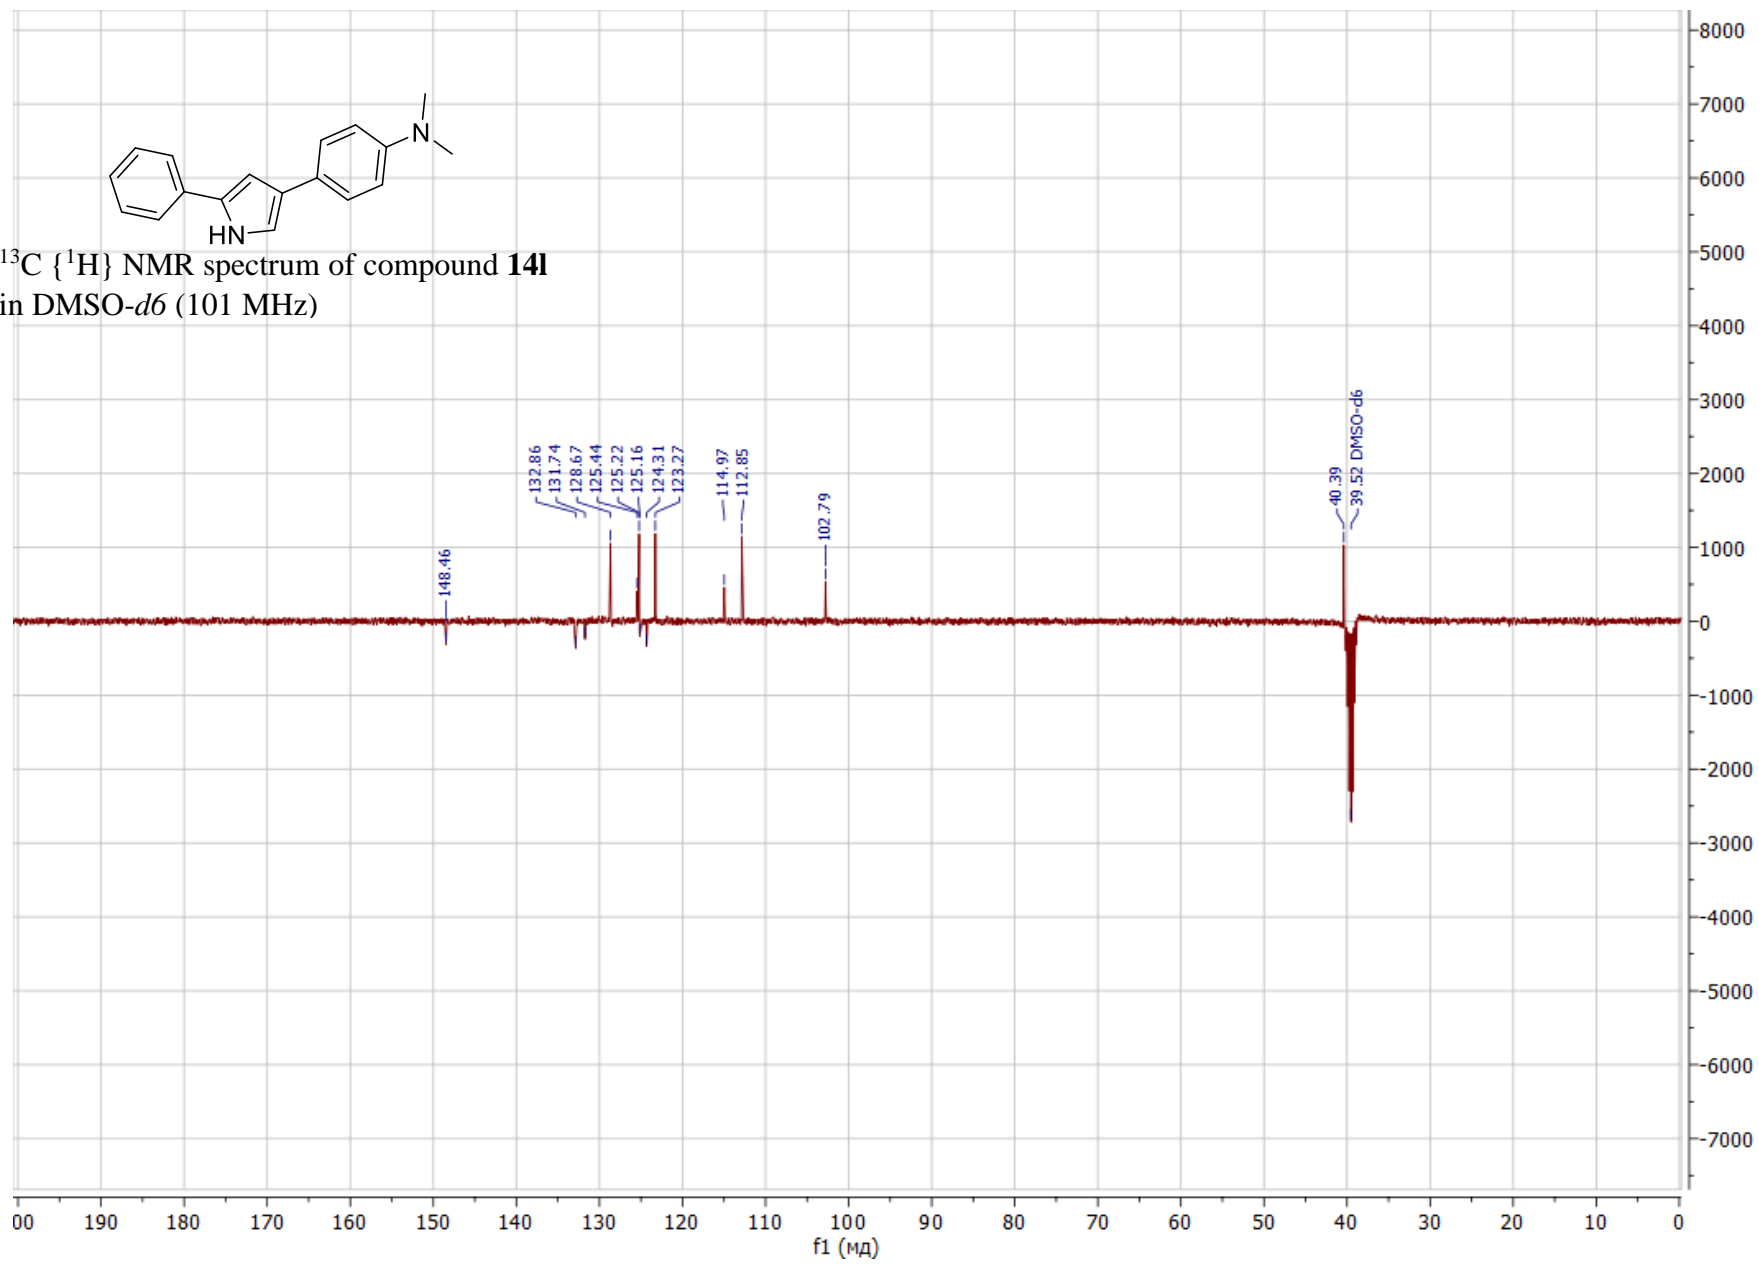

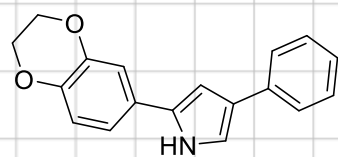

<sup>1</sup>H NMR spectrum of compound **14m**  
in DMSO-*d*<sub>6</sub> (400 MHz)

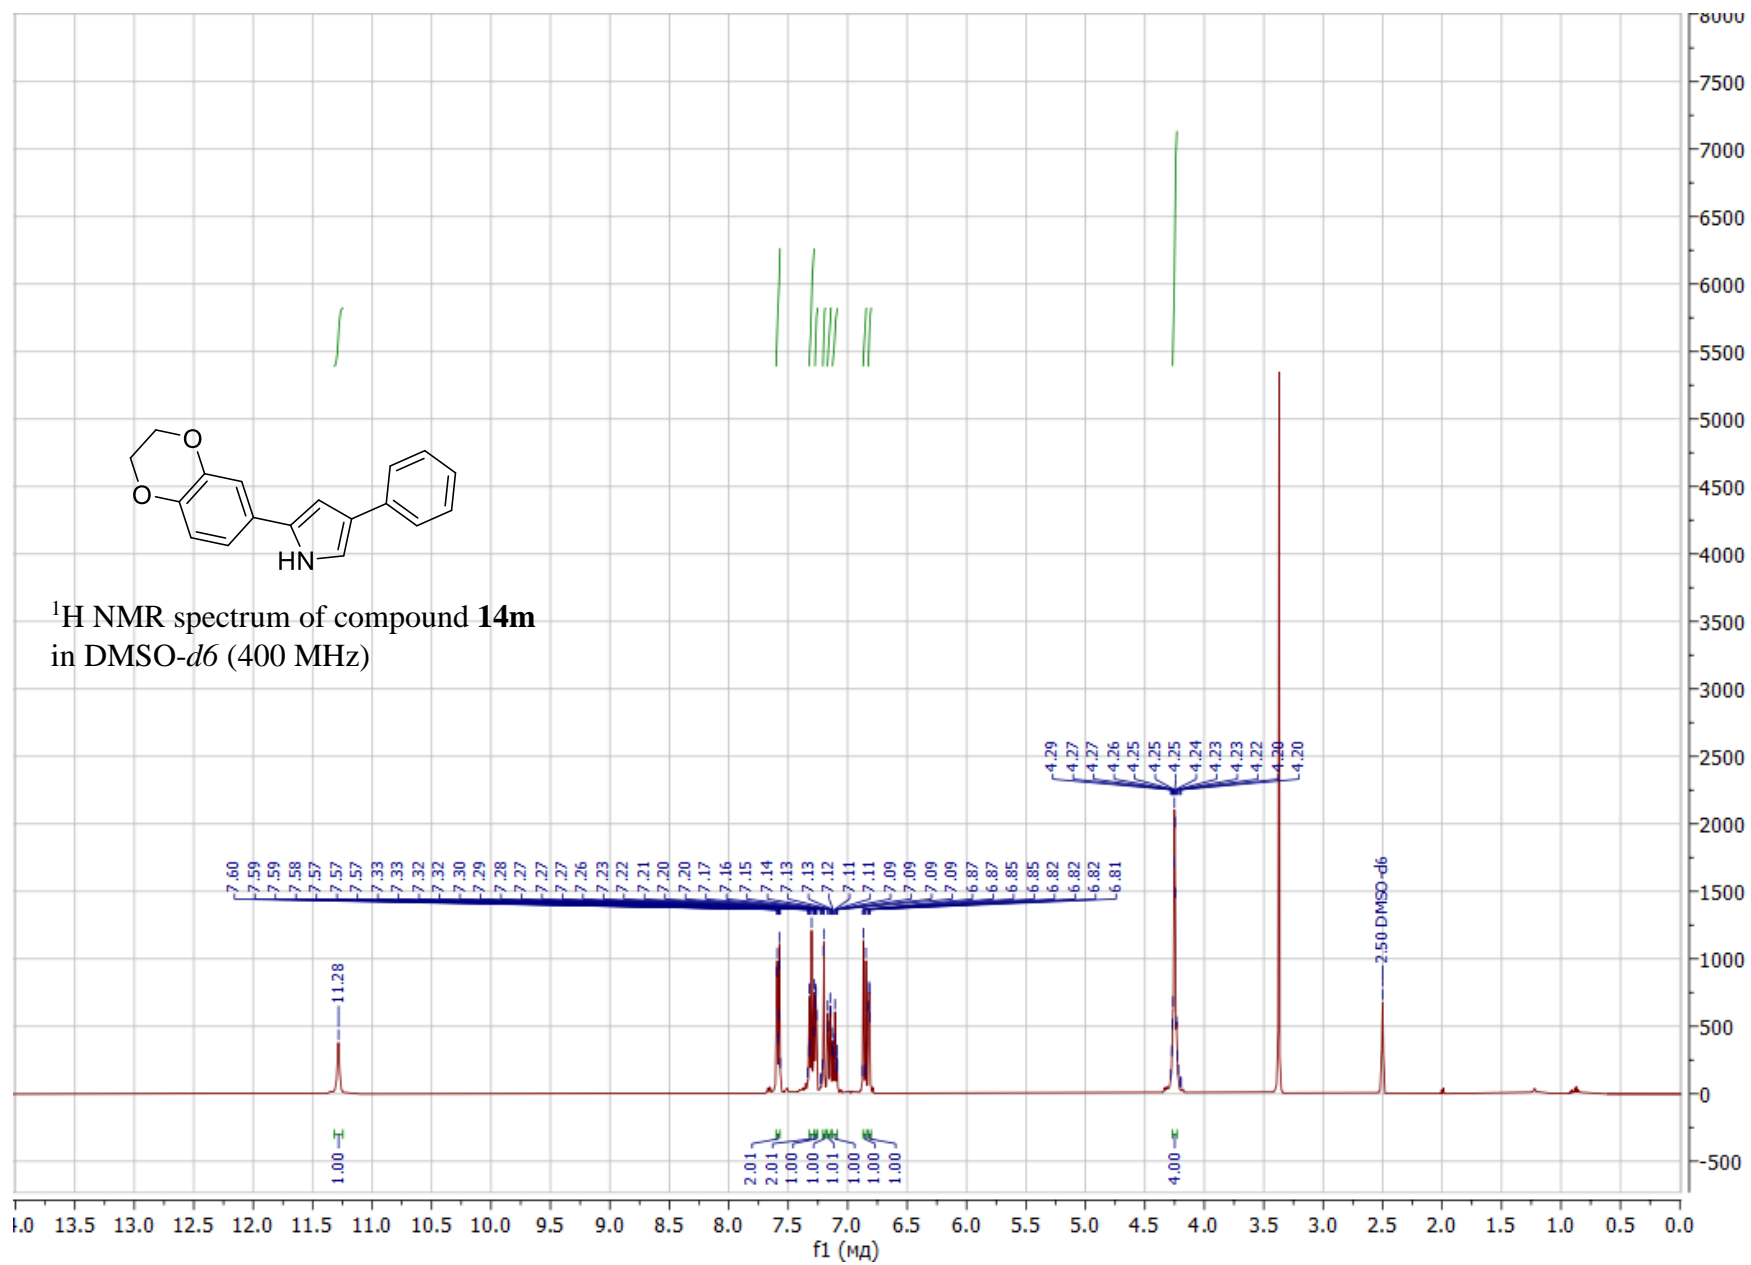

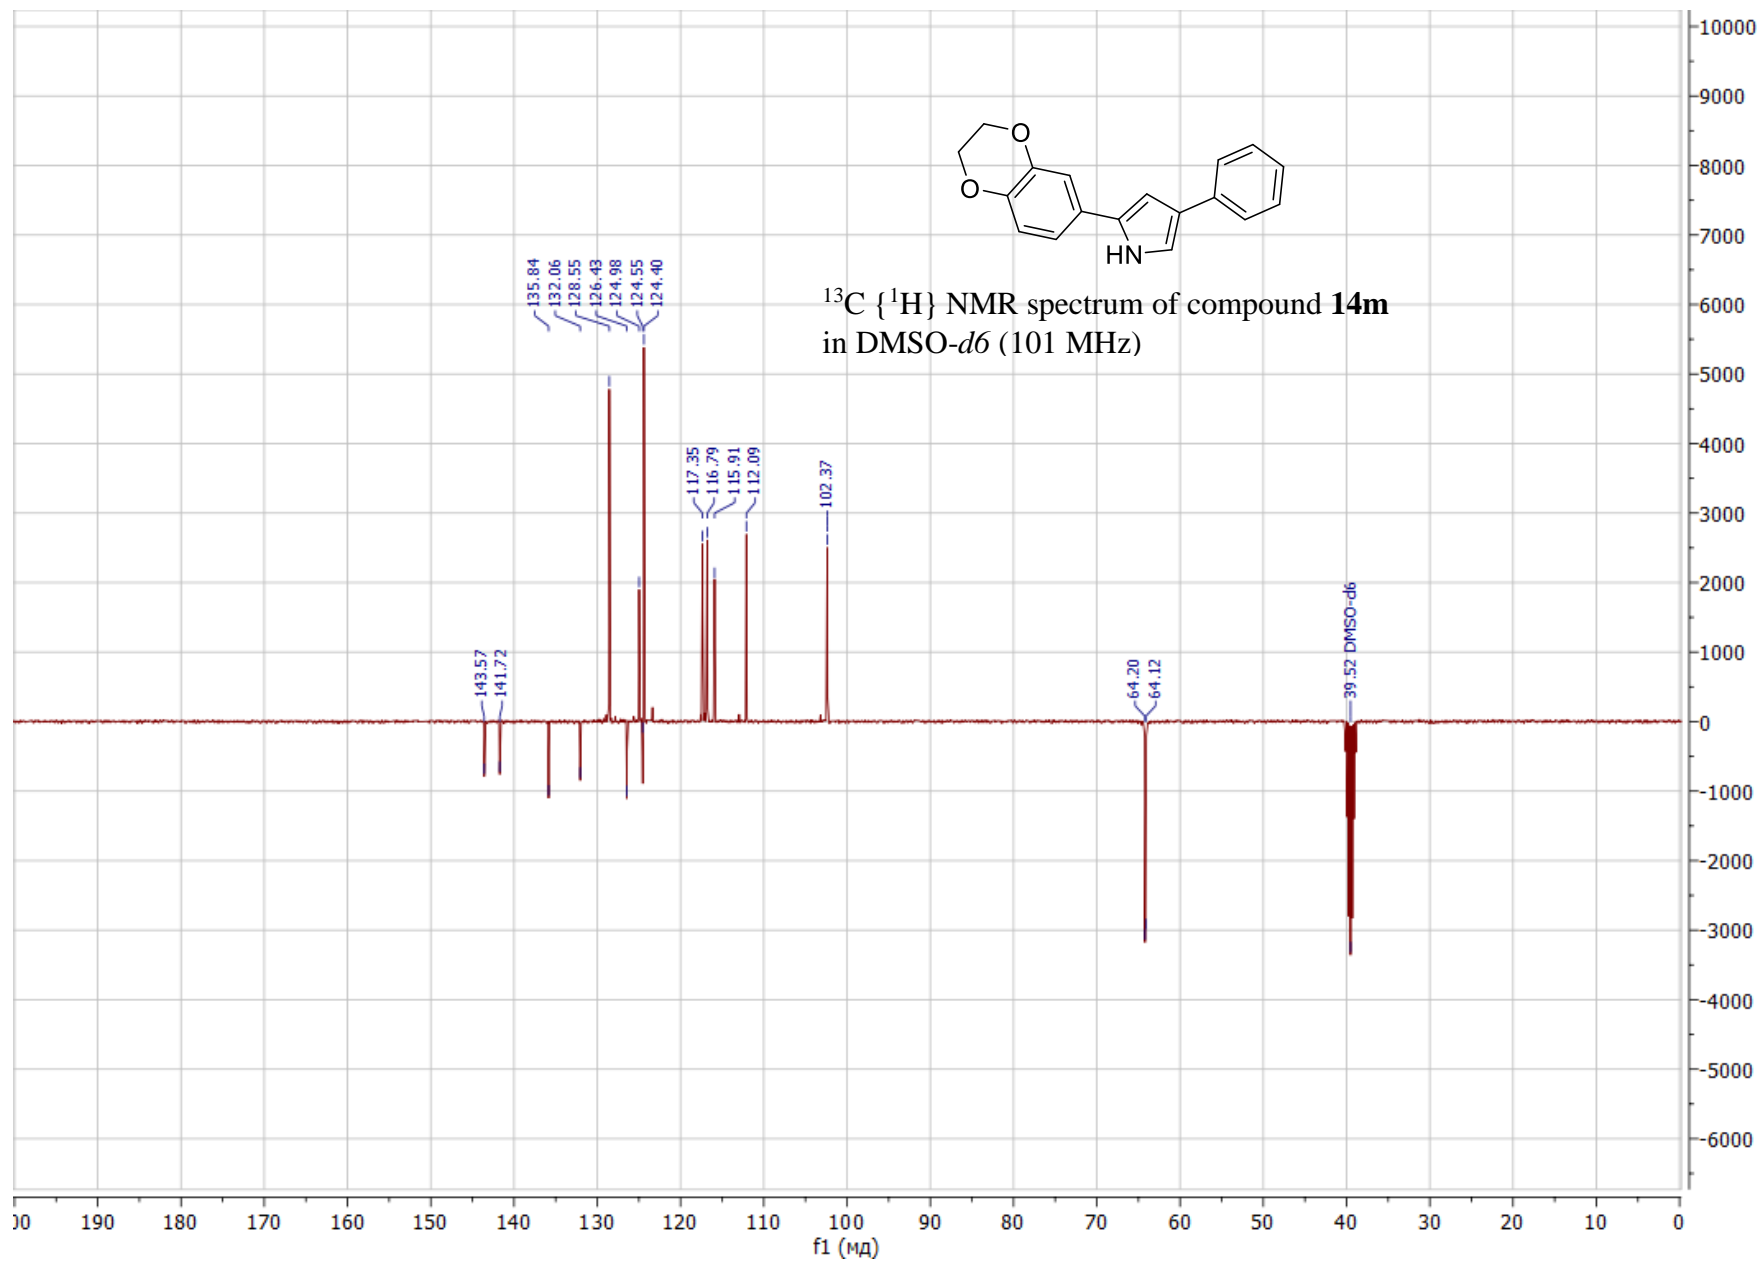

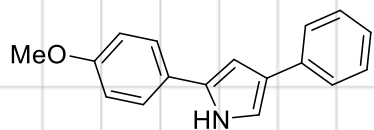

$^1\text{H}$  NMR spectrum of compound **14n**  
in DMSO-*d*<sub>6</sub> (400 MHz)

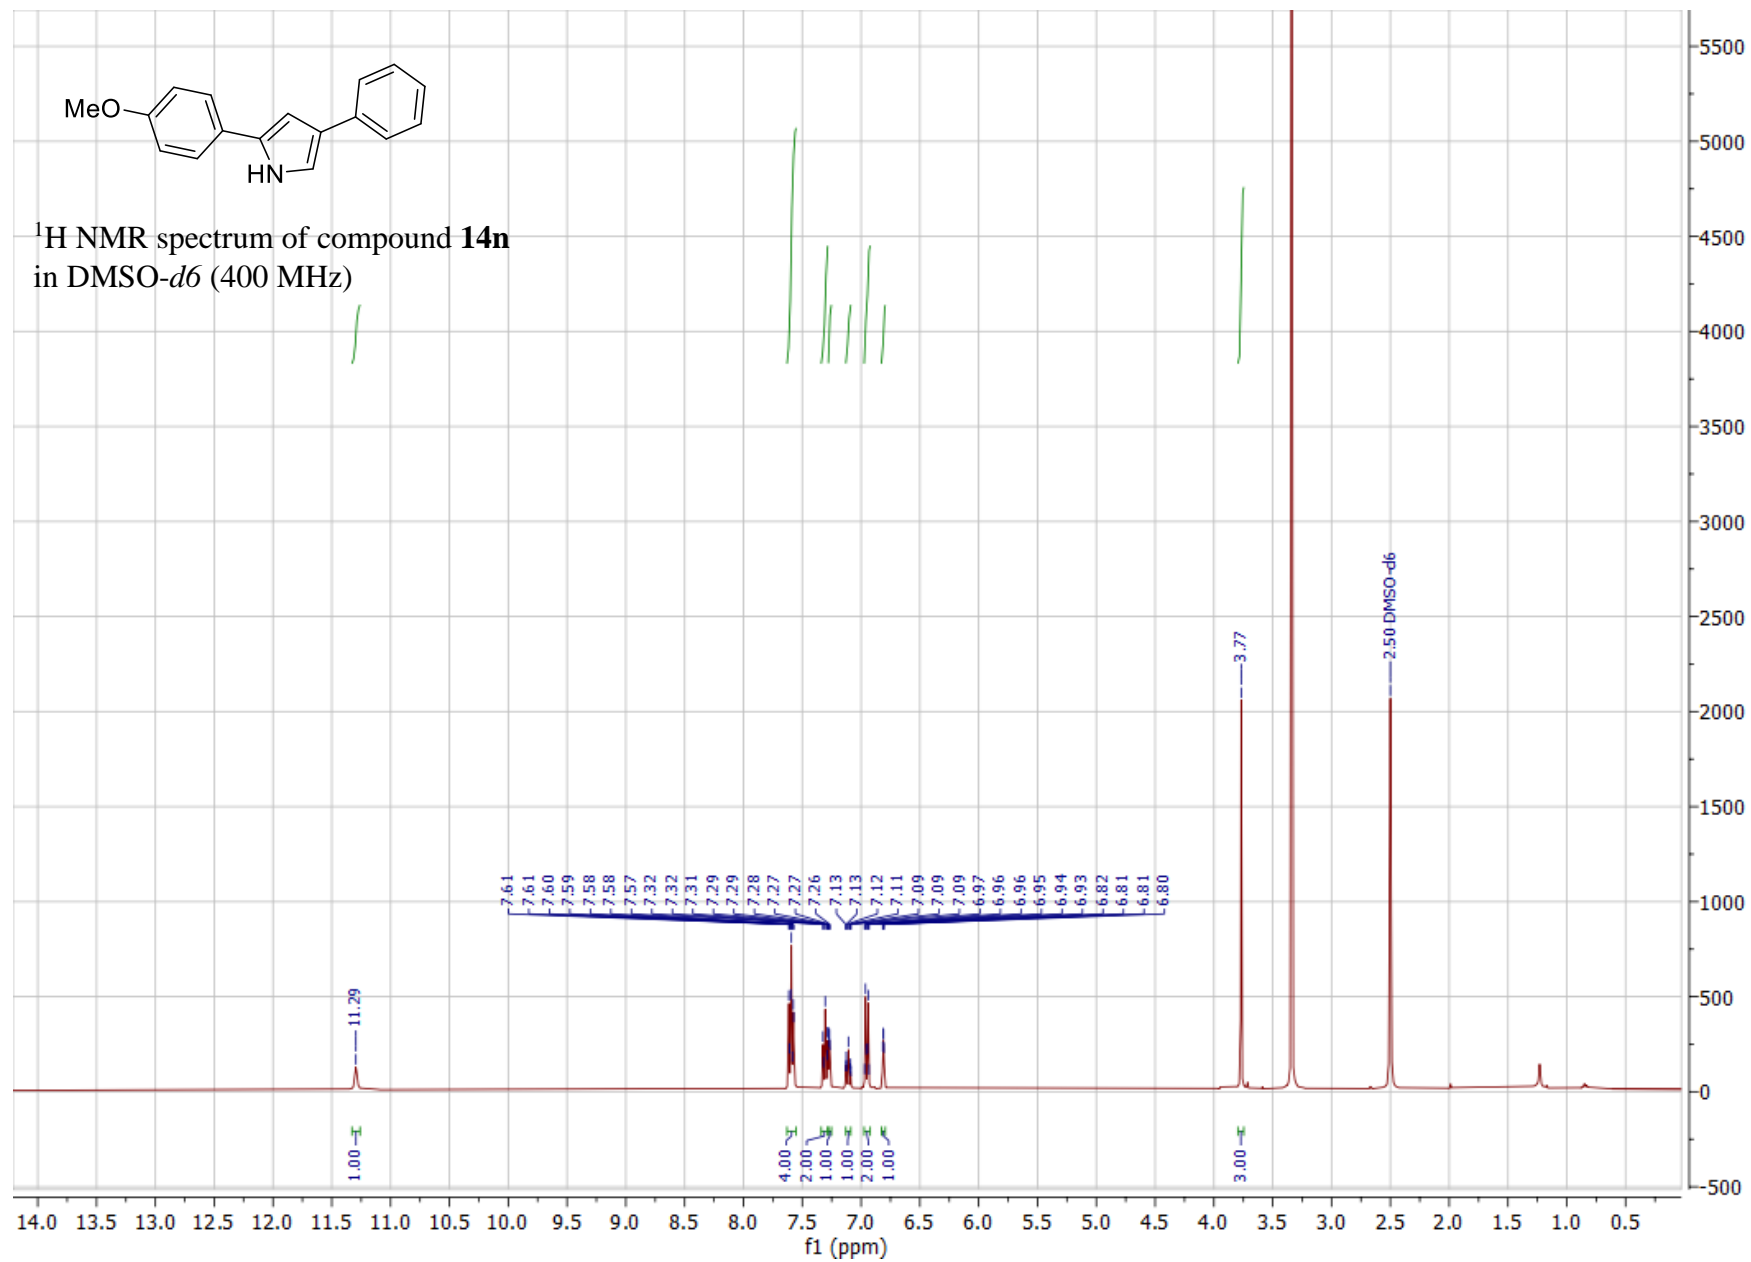

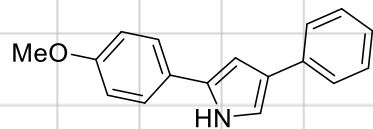

$^{13}\text{C}$   $\{^1\text{H}\}$  NMR spectrum of compound **14n**  
in DMSO-*d*<sub>6</sub> (101 MHz)

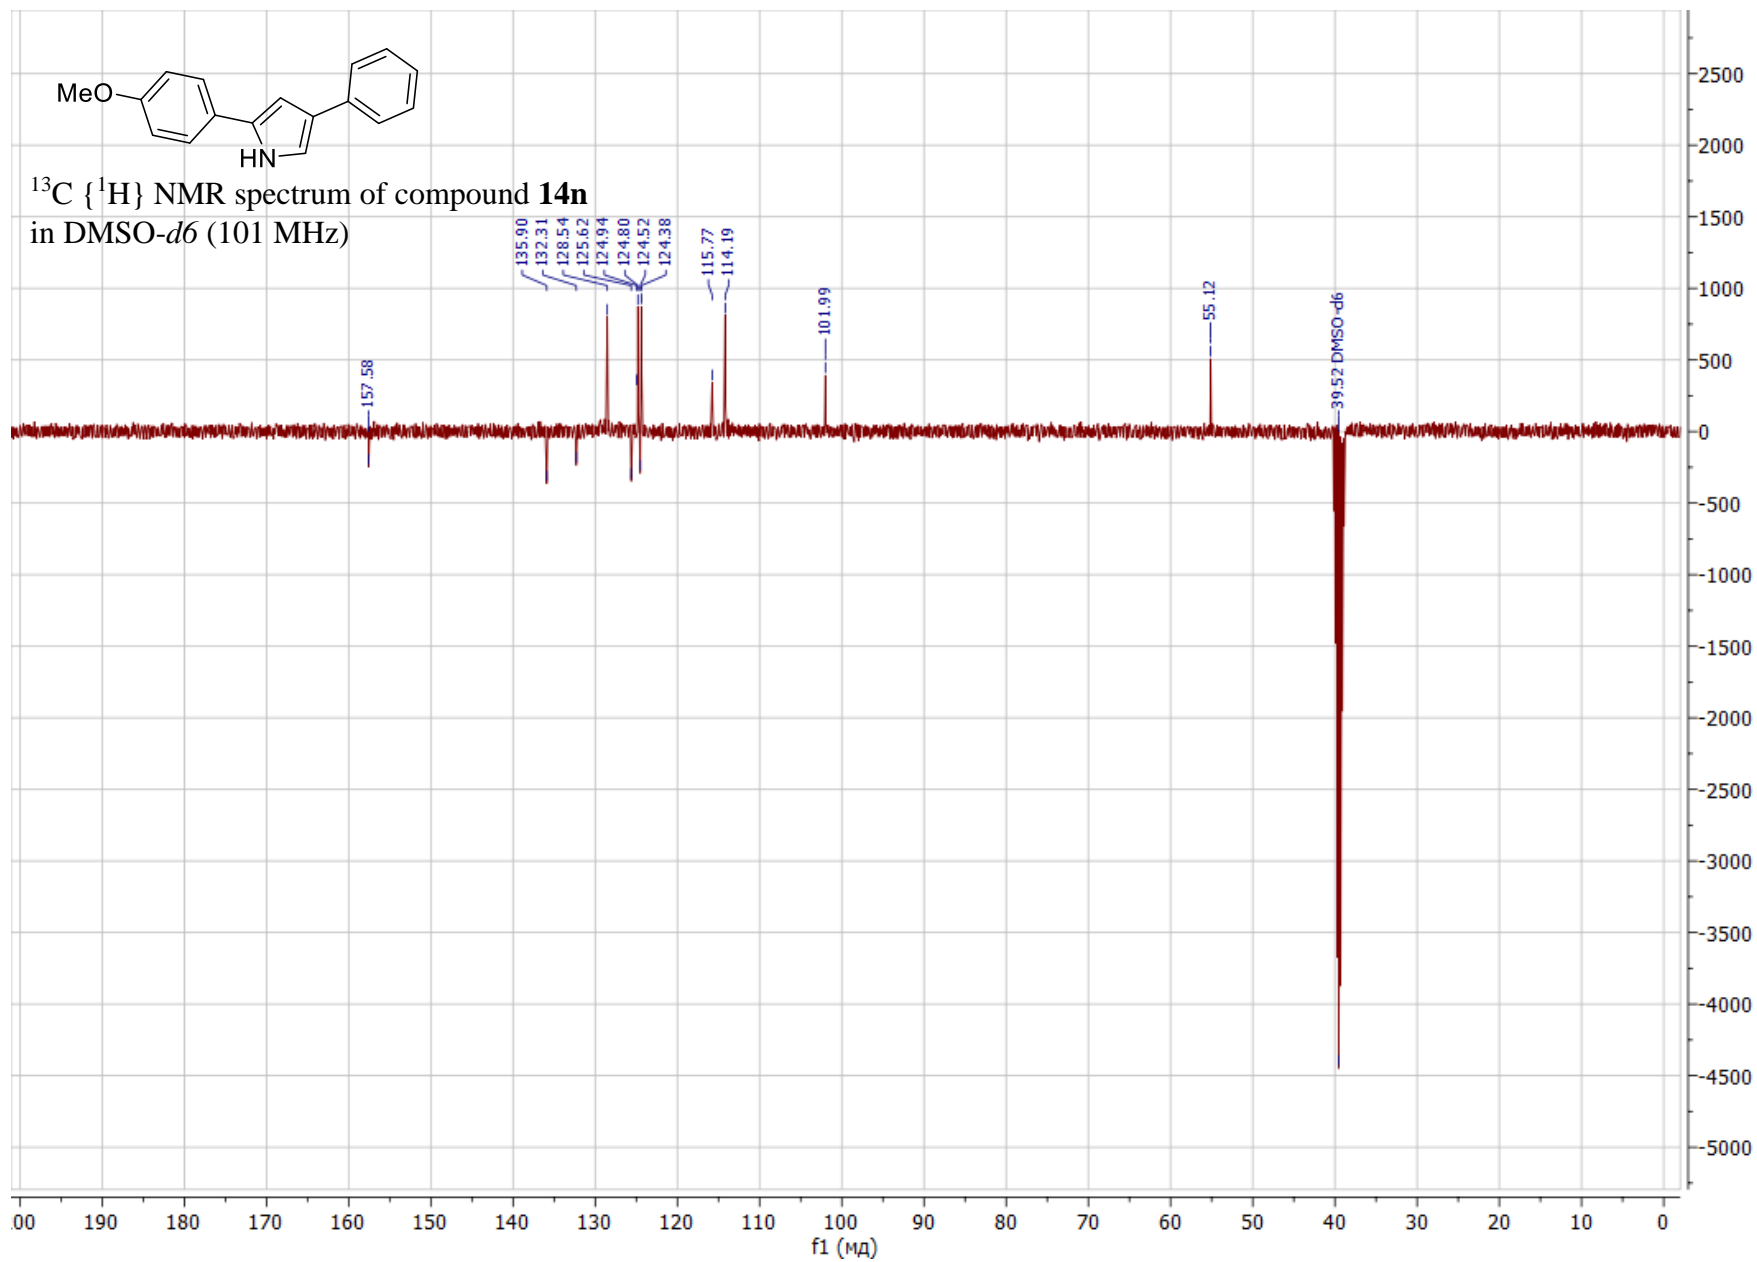



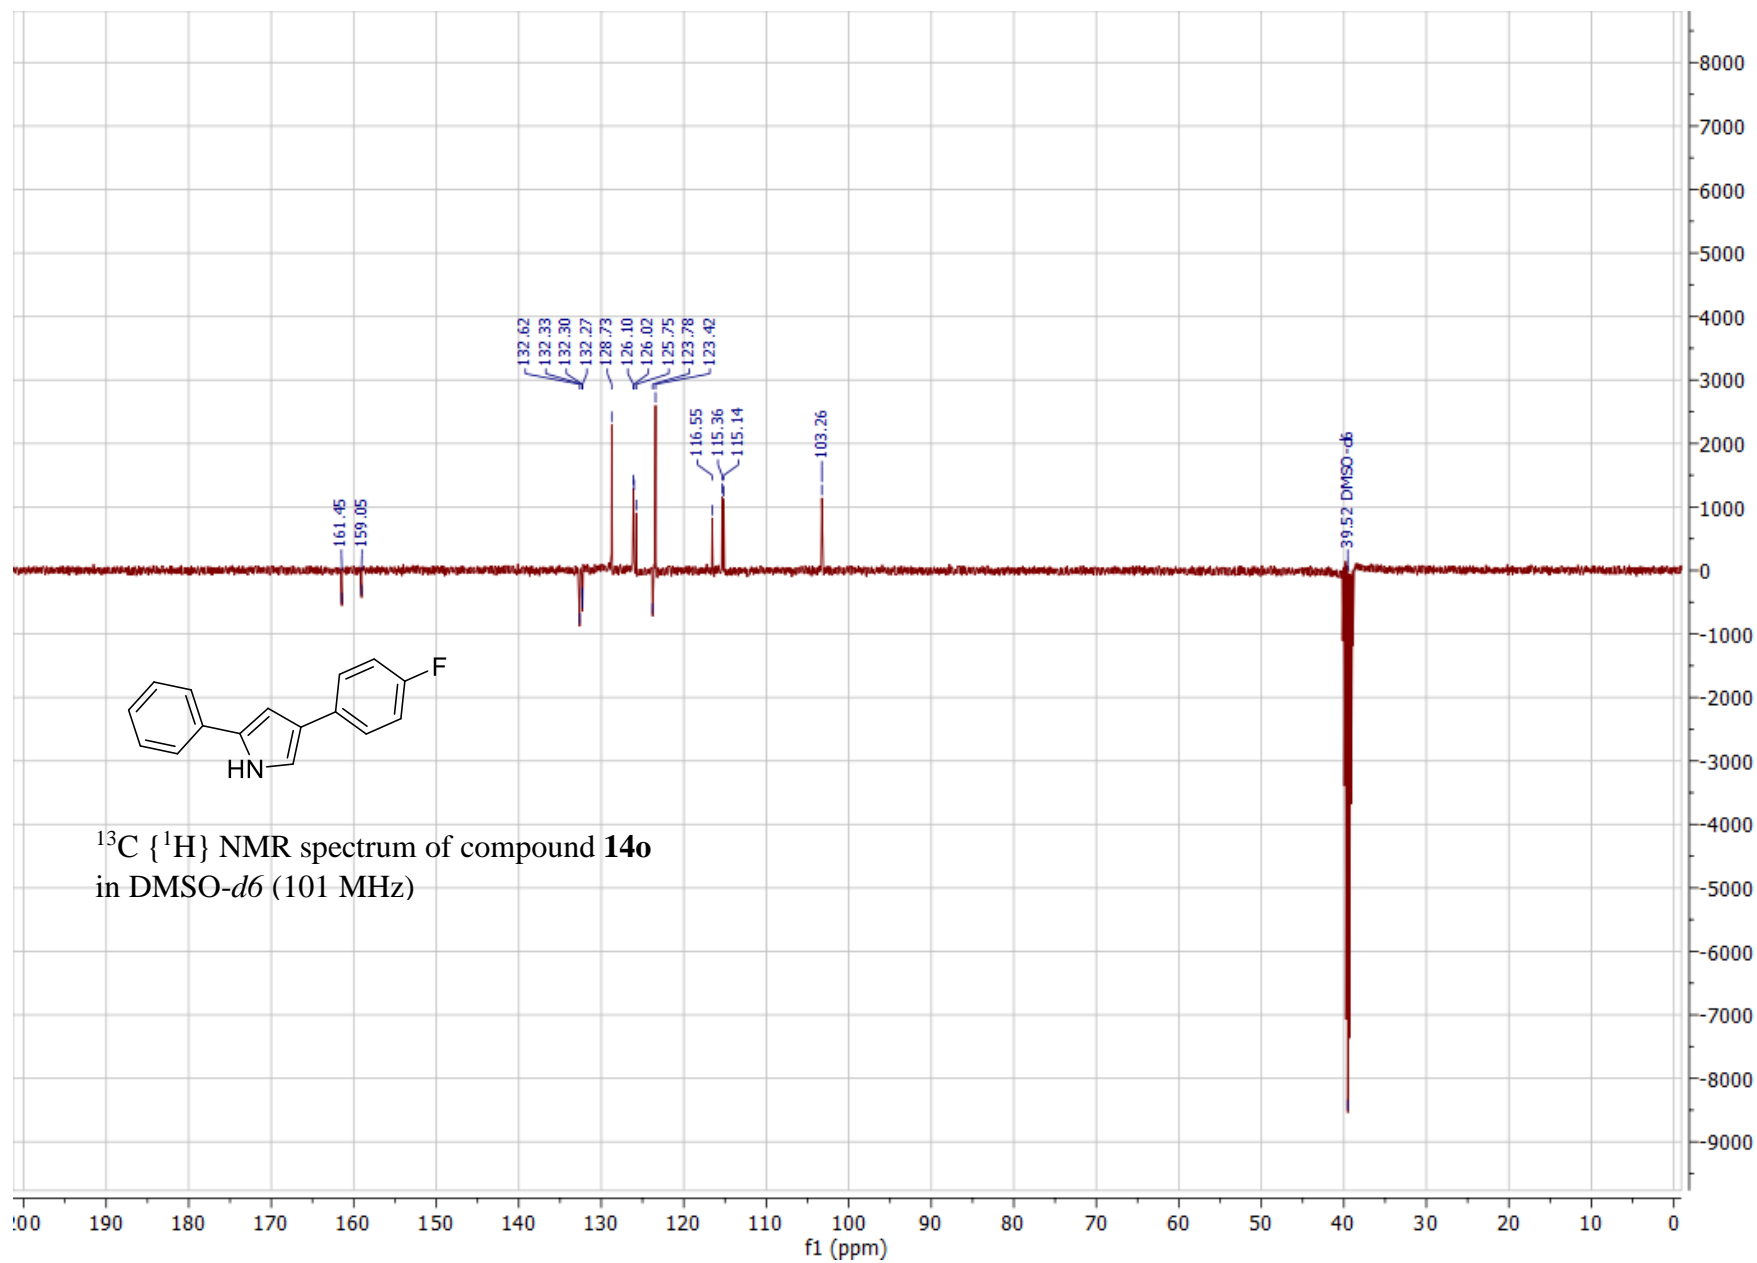

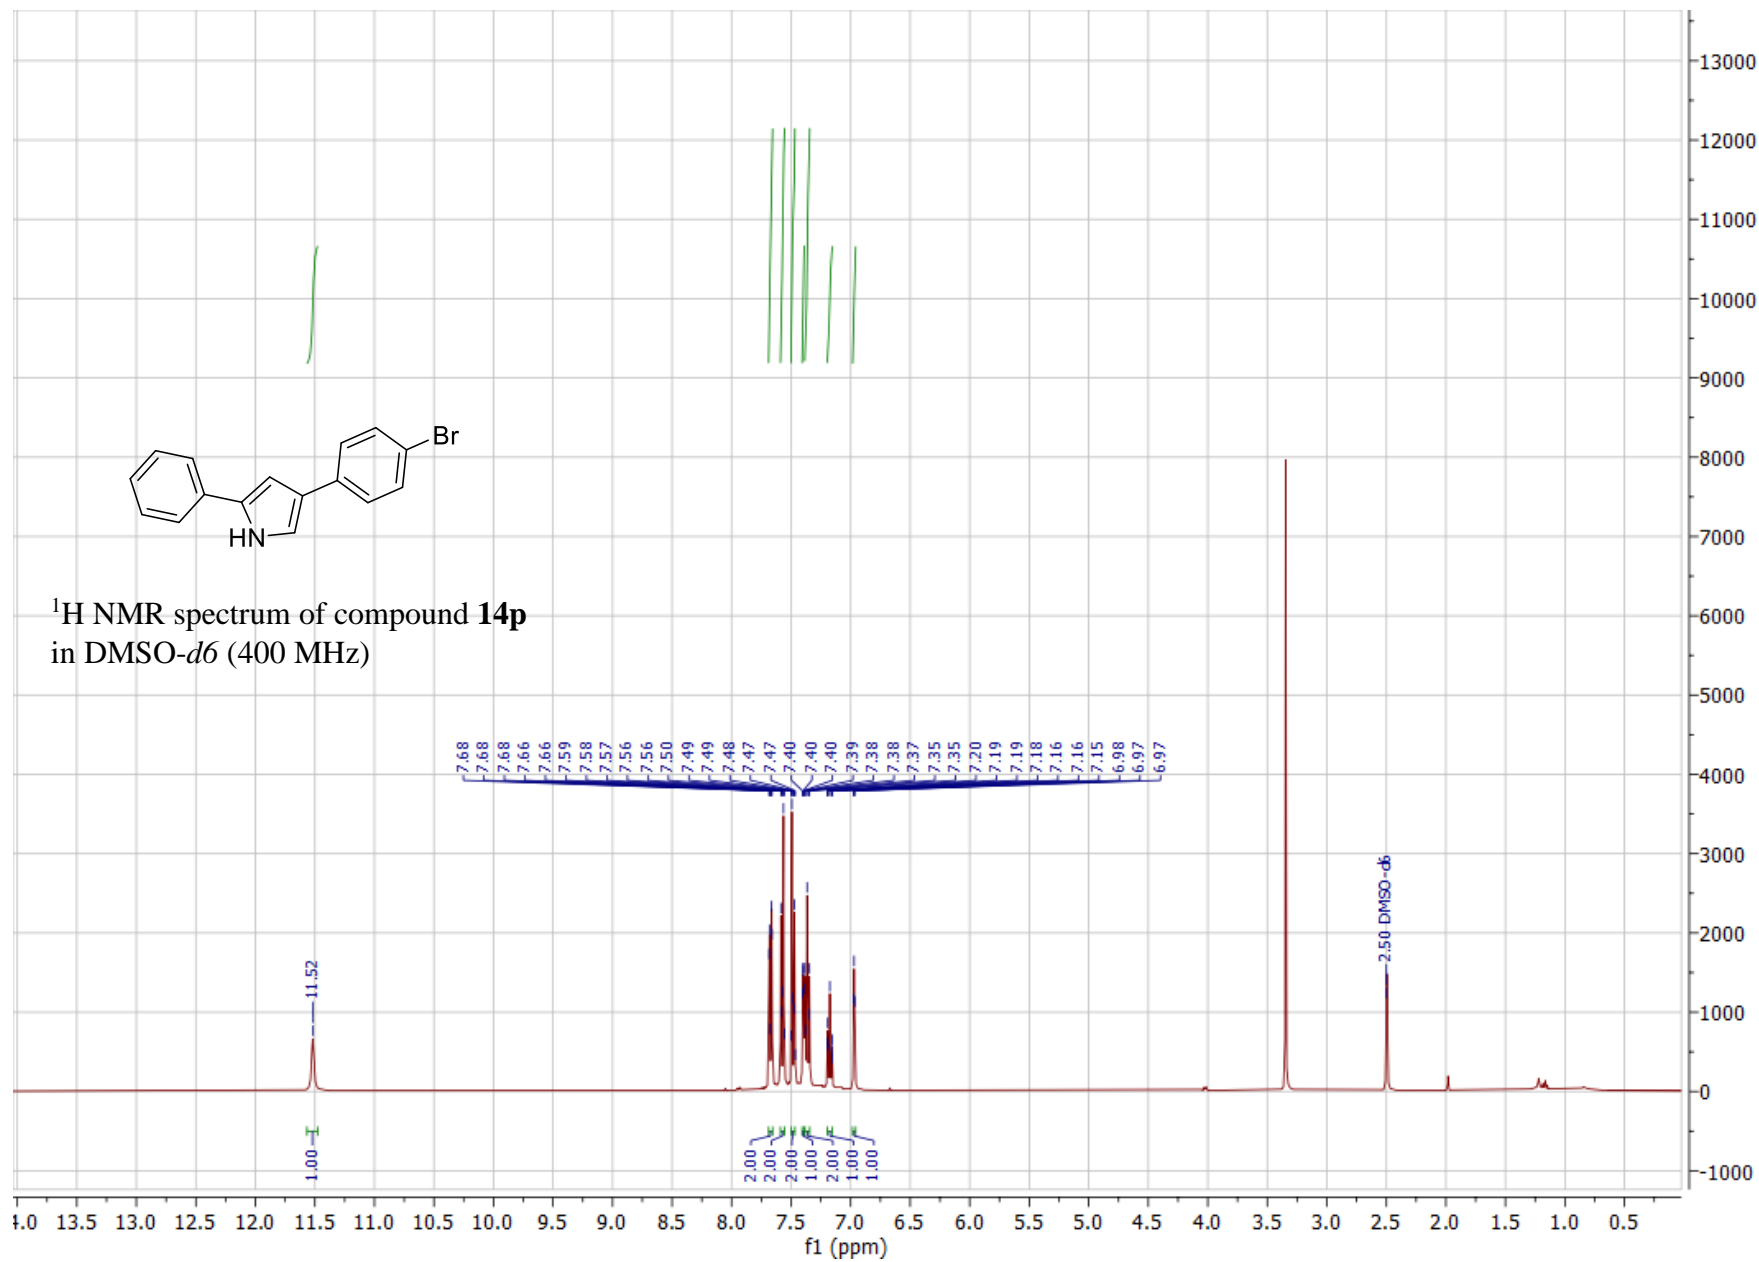

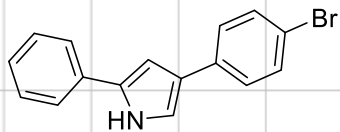

$^{13}\text{C}$   $\{^1\text{H}\}$  NMR spectrum of compound **14p**  
in DMSO-*d*<sub>6</sub> (101 MHz)

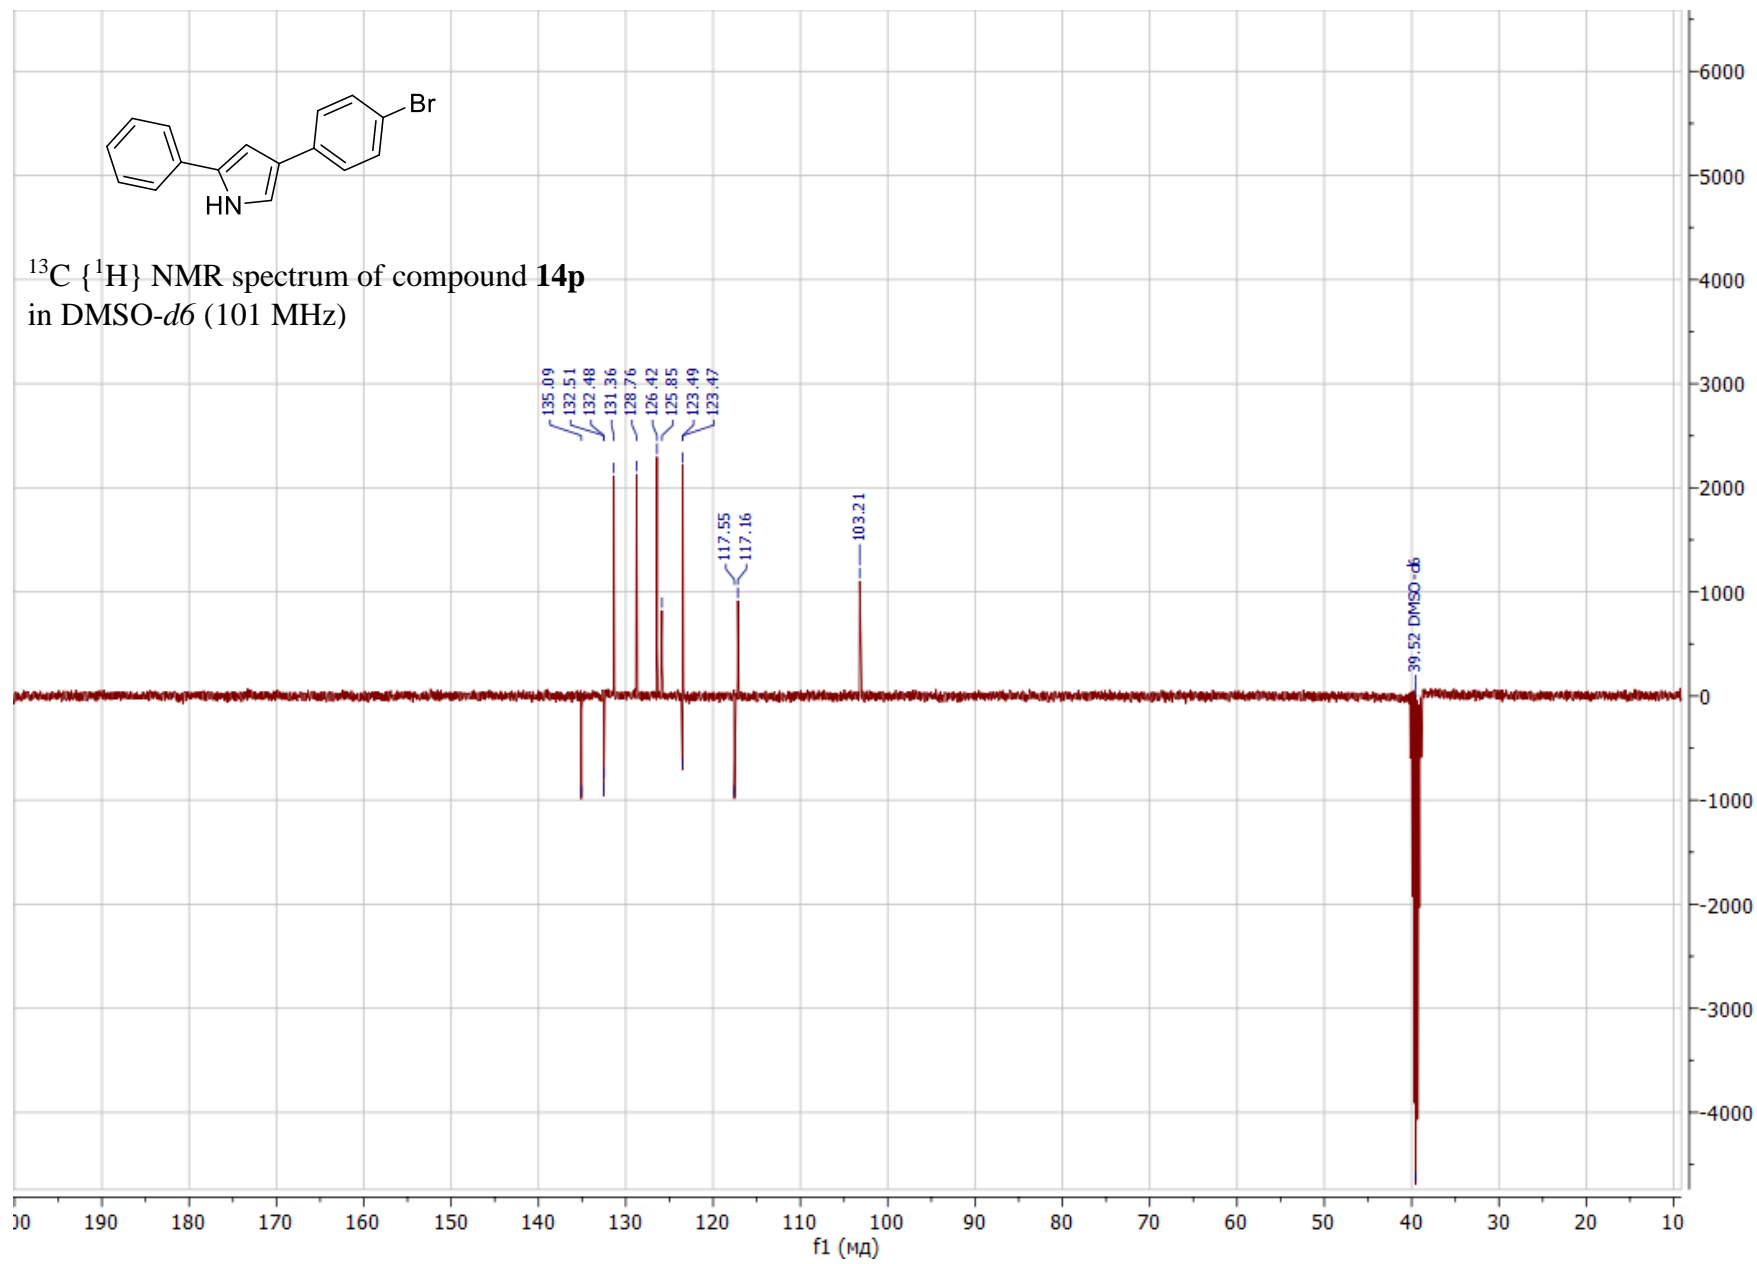

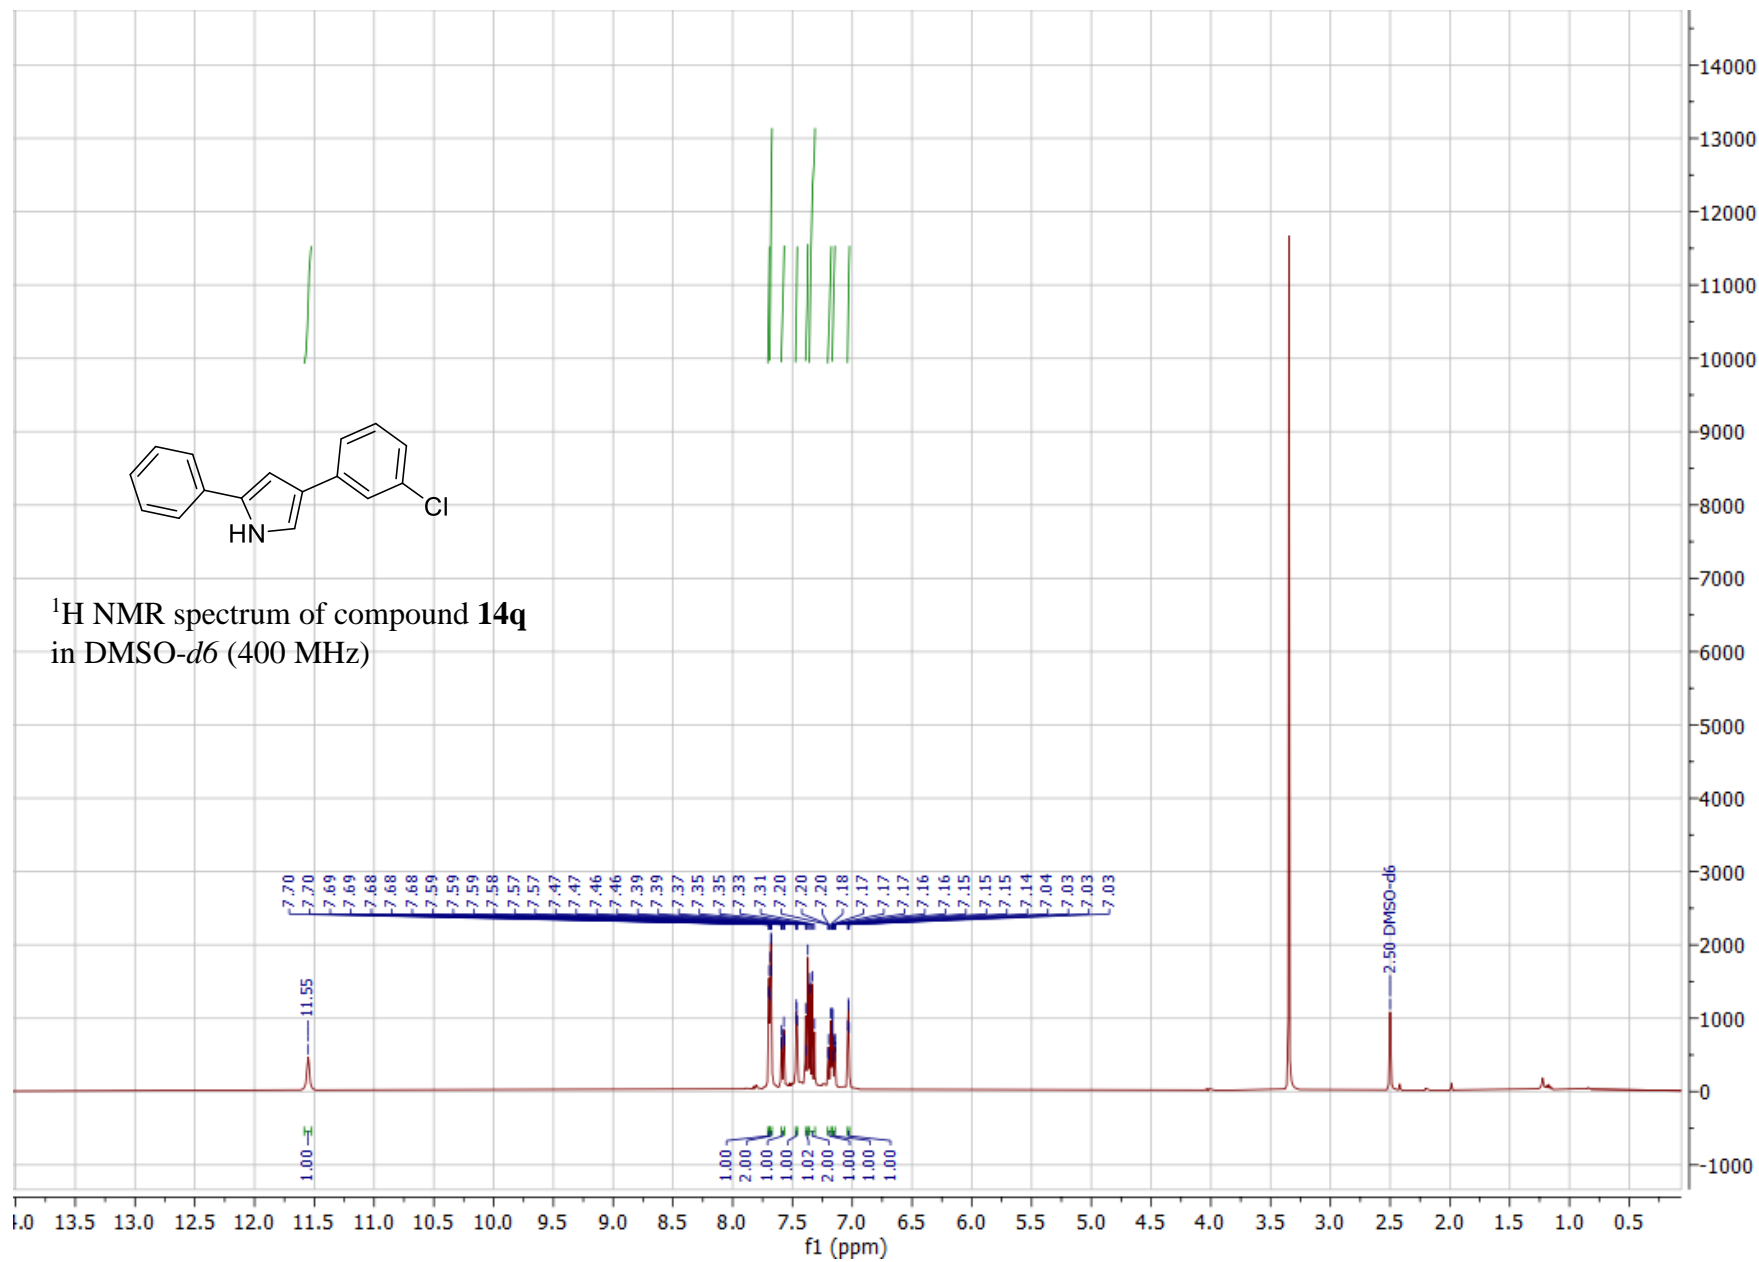

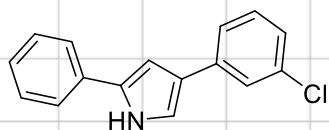

$^{13}\text{C}$   $\{^1\text{H}\}$  NMR spectrum of compound **14q**  
in DMSO-*d*<sub>6</sub> (101 MHz)

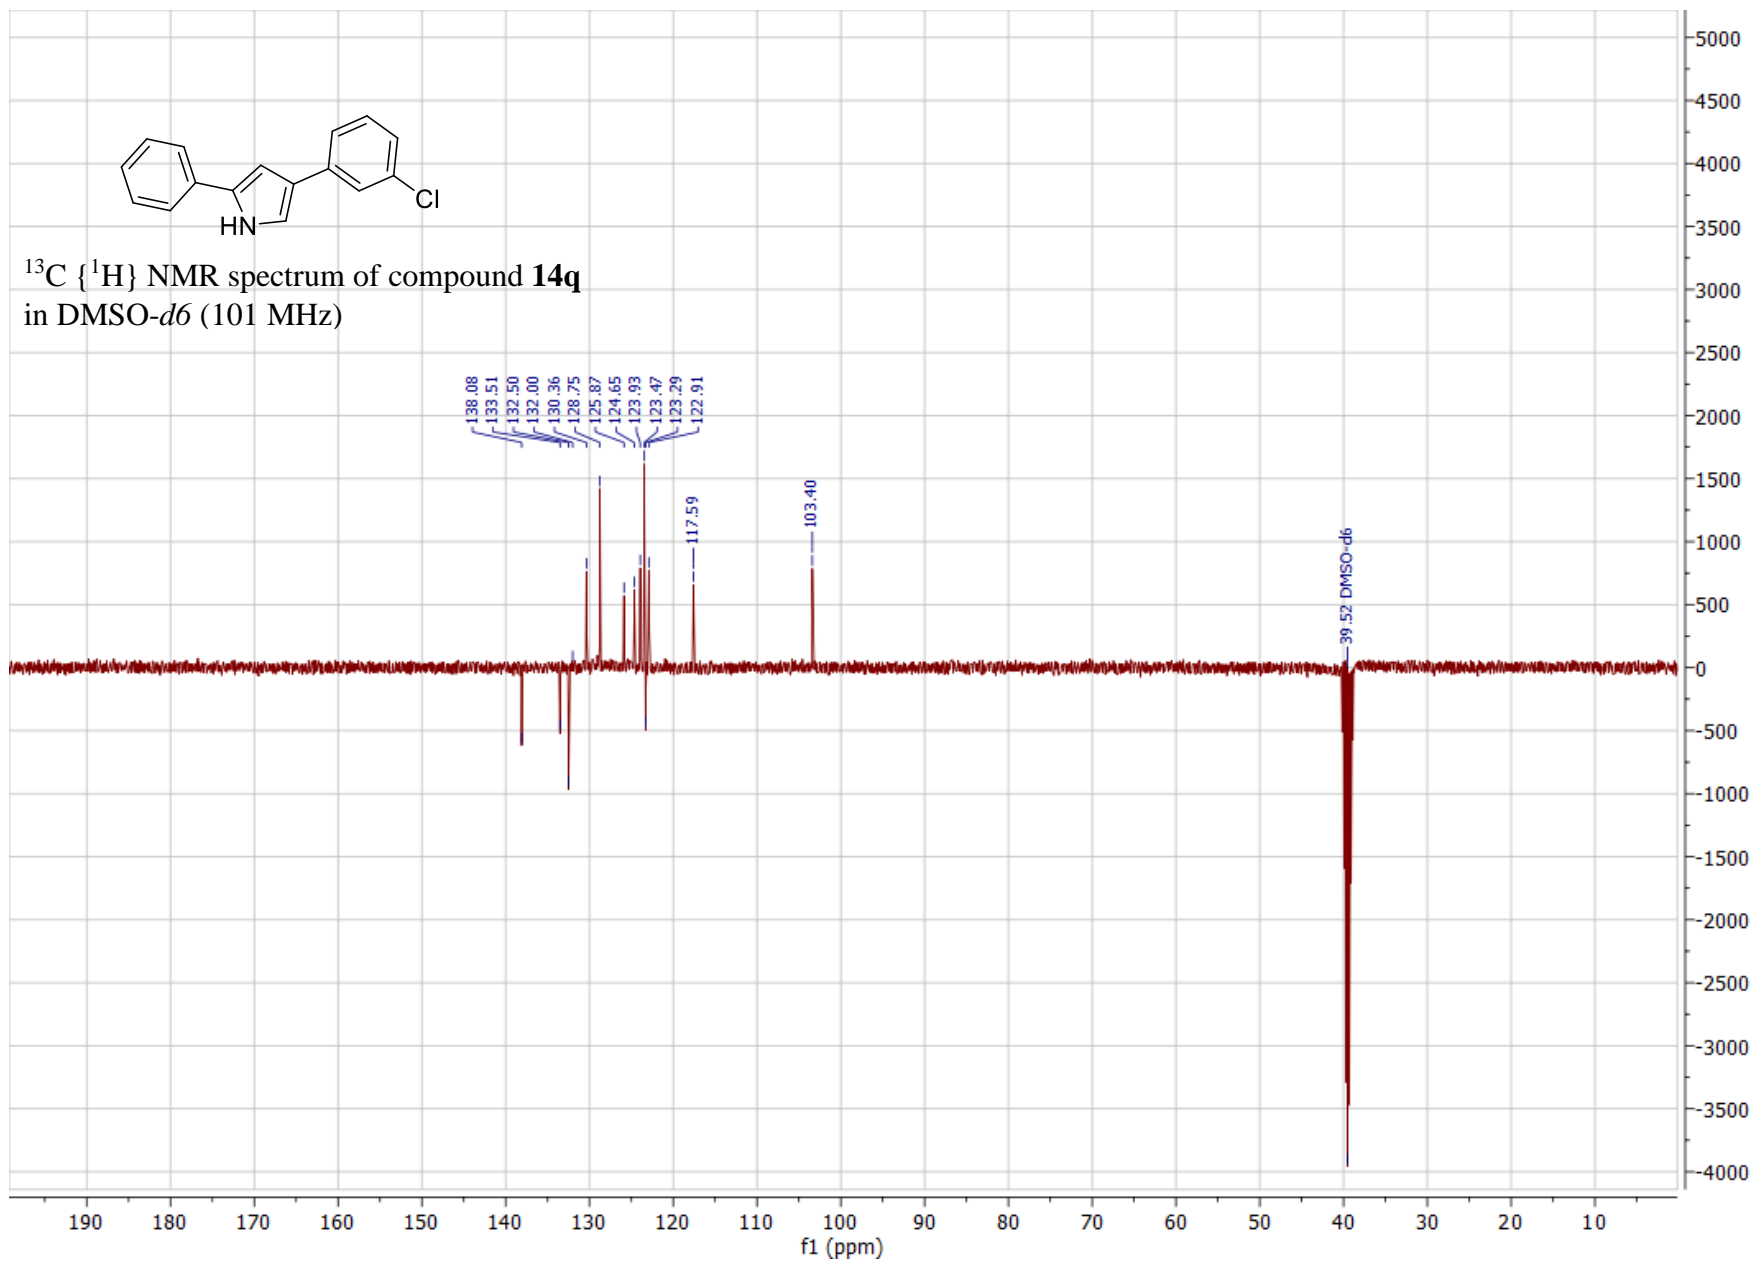

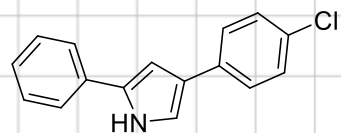

<sup>1</sup>H NMR spectrum of compound **14r**  
in DMSO-*d*<sub>6</sub> (400 MHz)

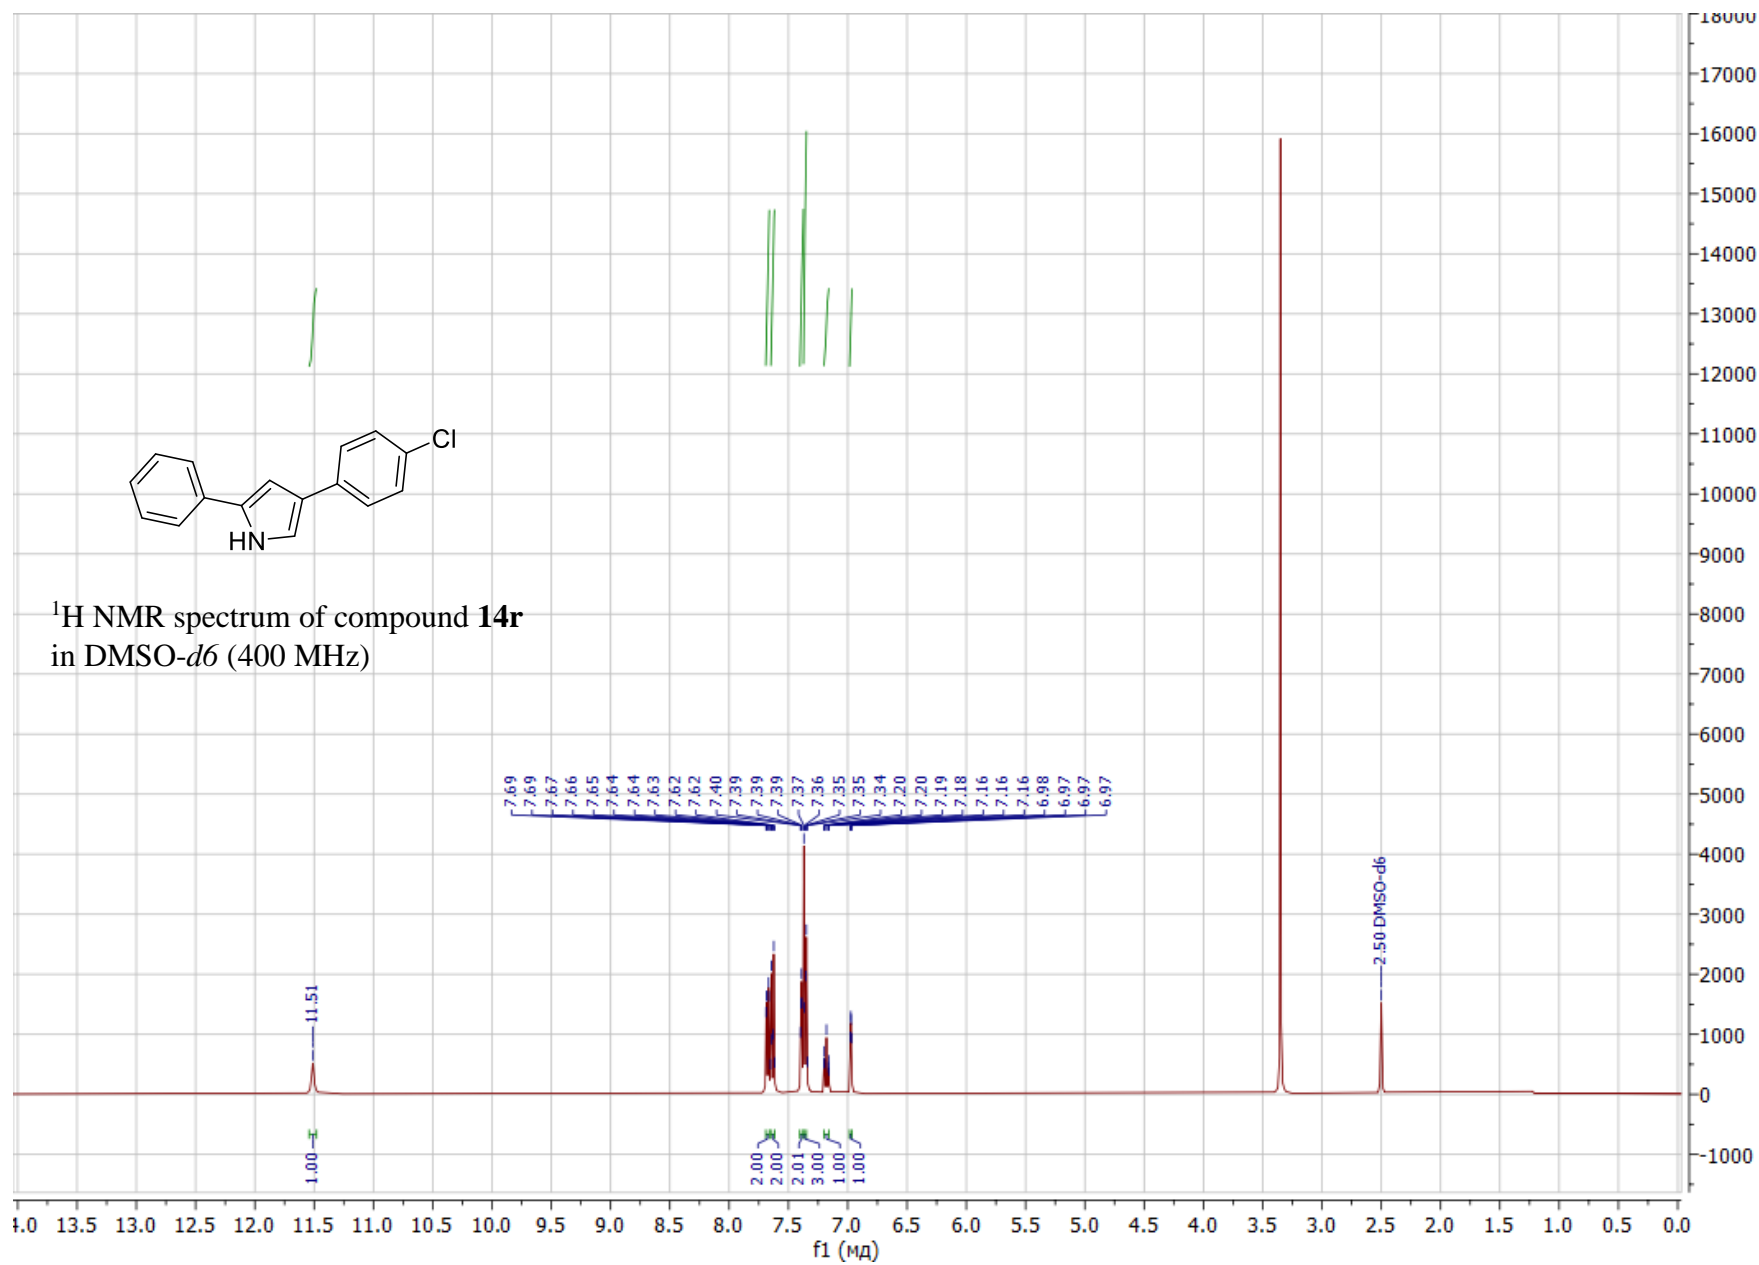

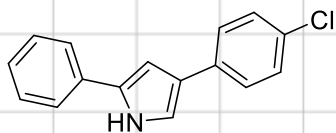

$^{13}\text{C}$   $\{^1\text{H}\}$  NMR spectrum of compound **14r**  
in DMSO-*d*<sub>6</sub> (101 MHz)

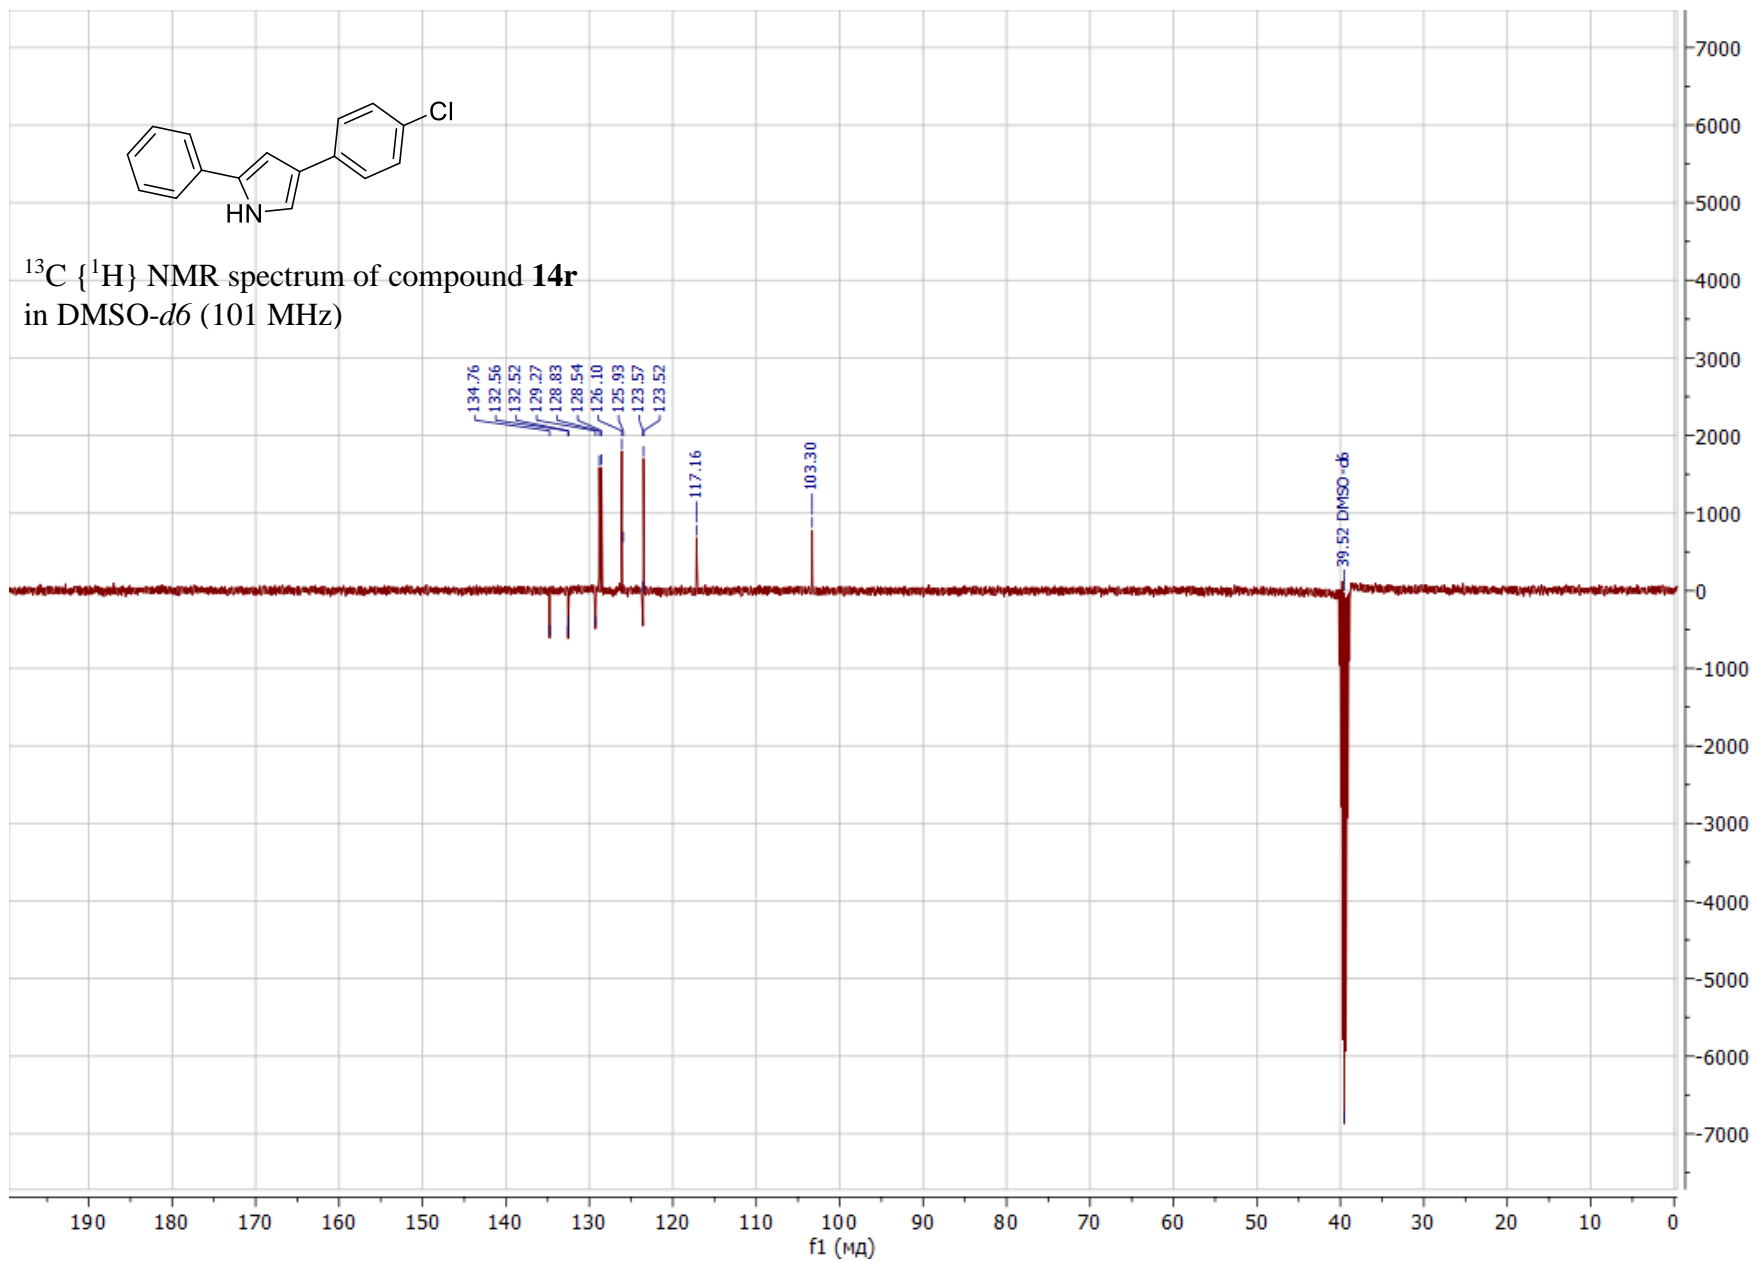

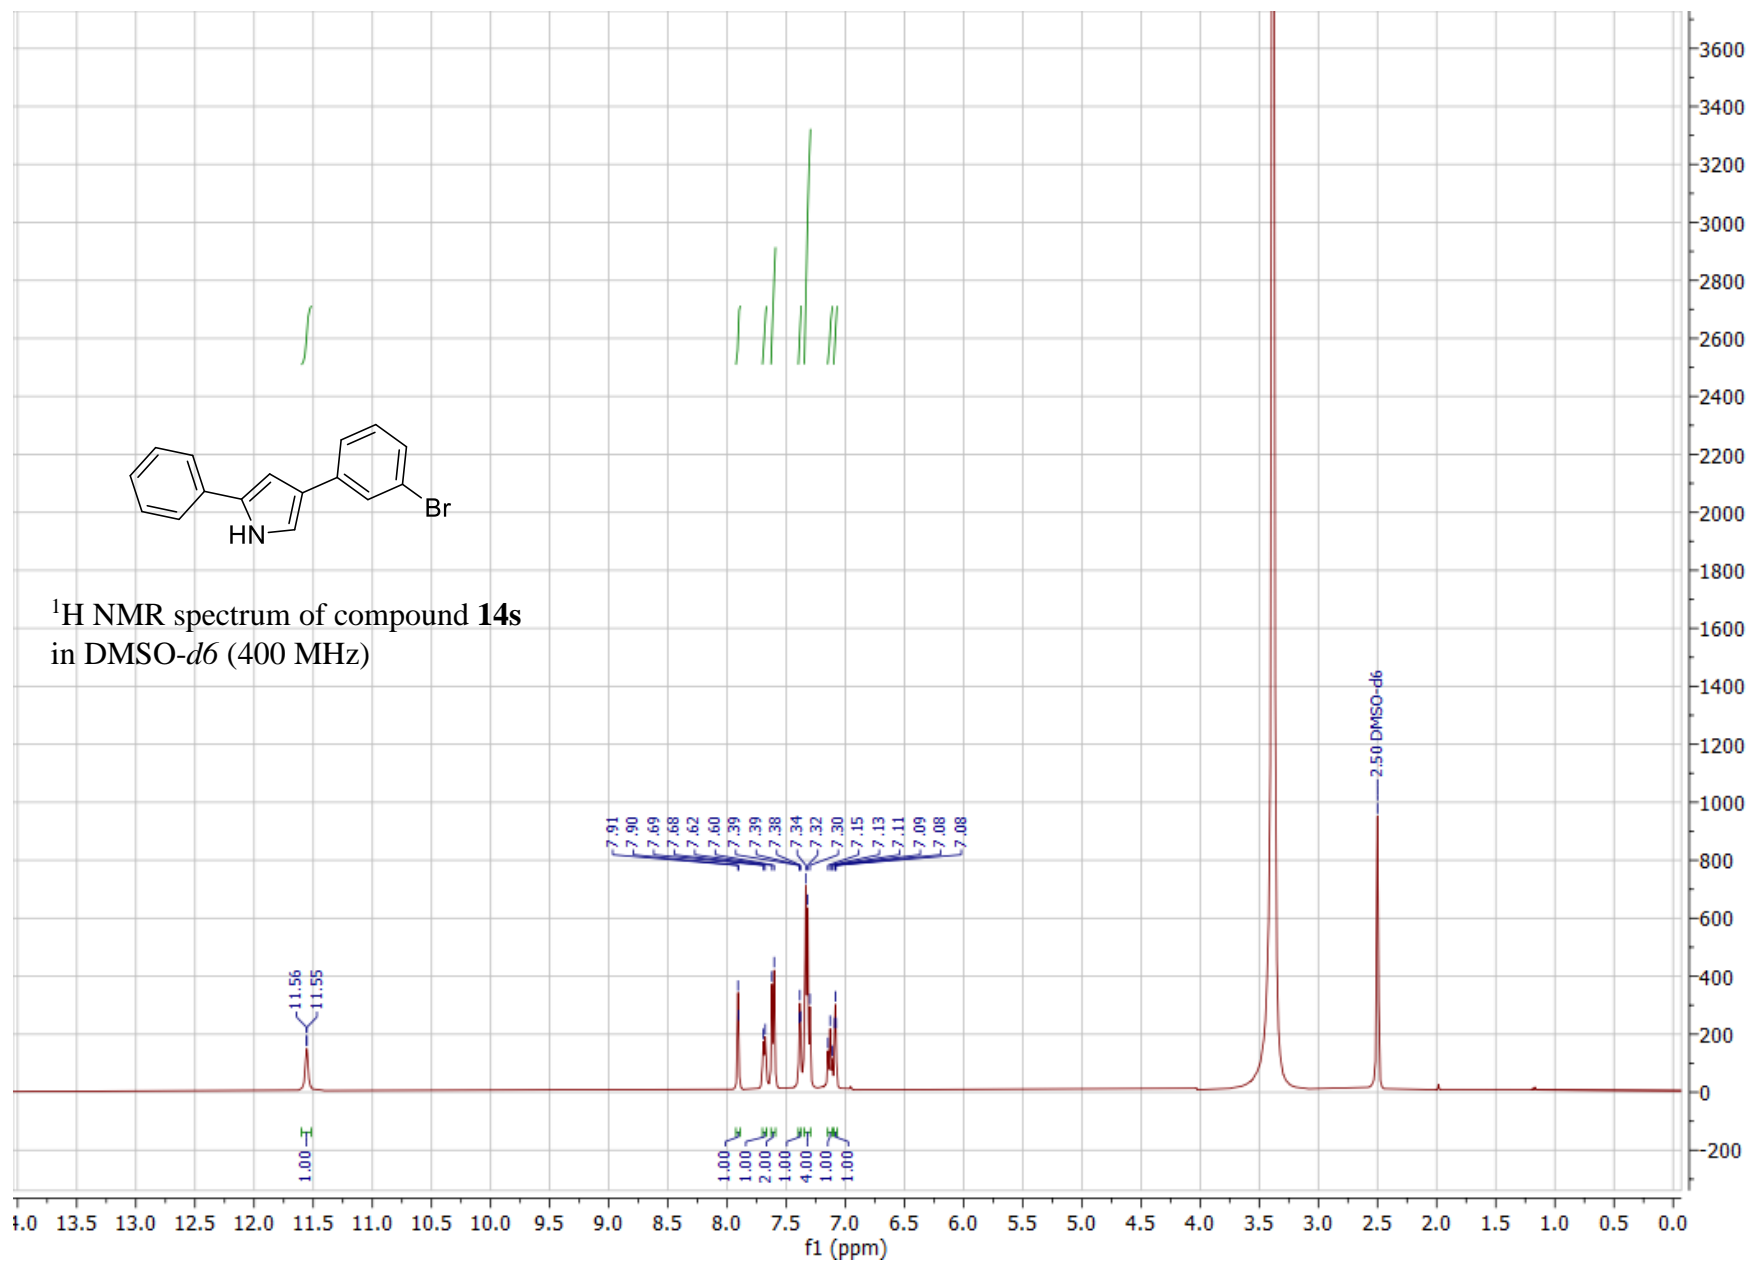

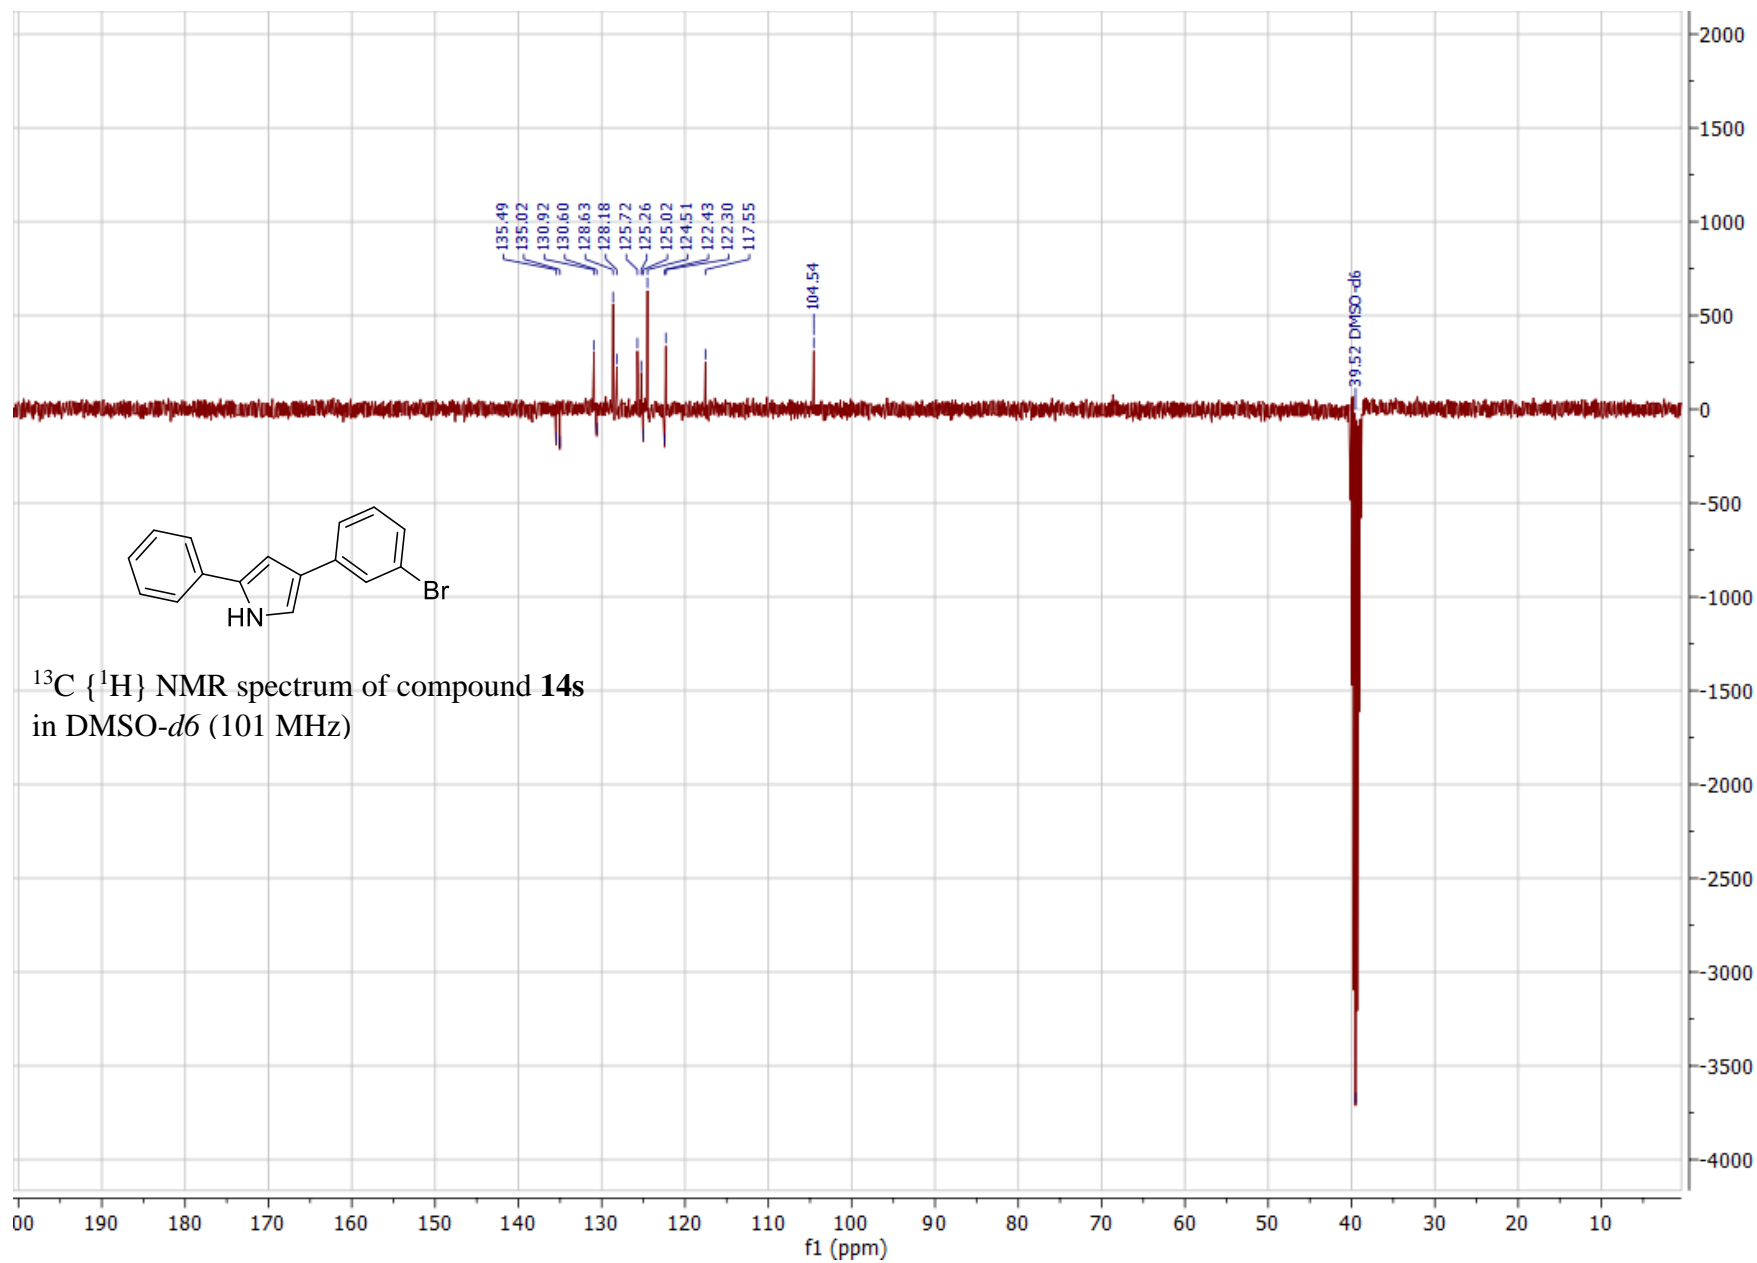

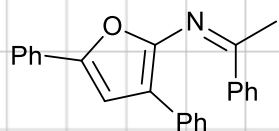

<sup>1</sup>H NMR spectrum of compound **15**  
in DMSO-*d*<sub>6</sub> (400 MHz)

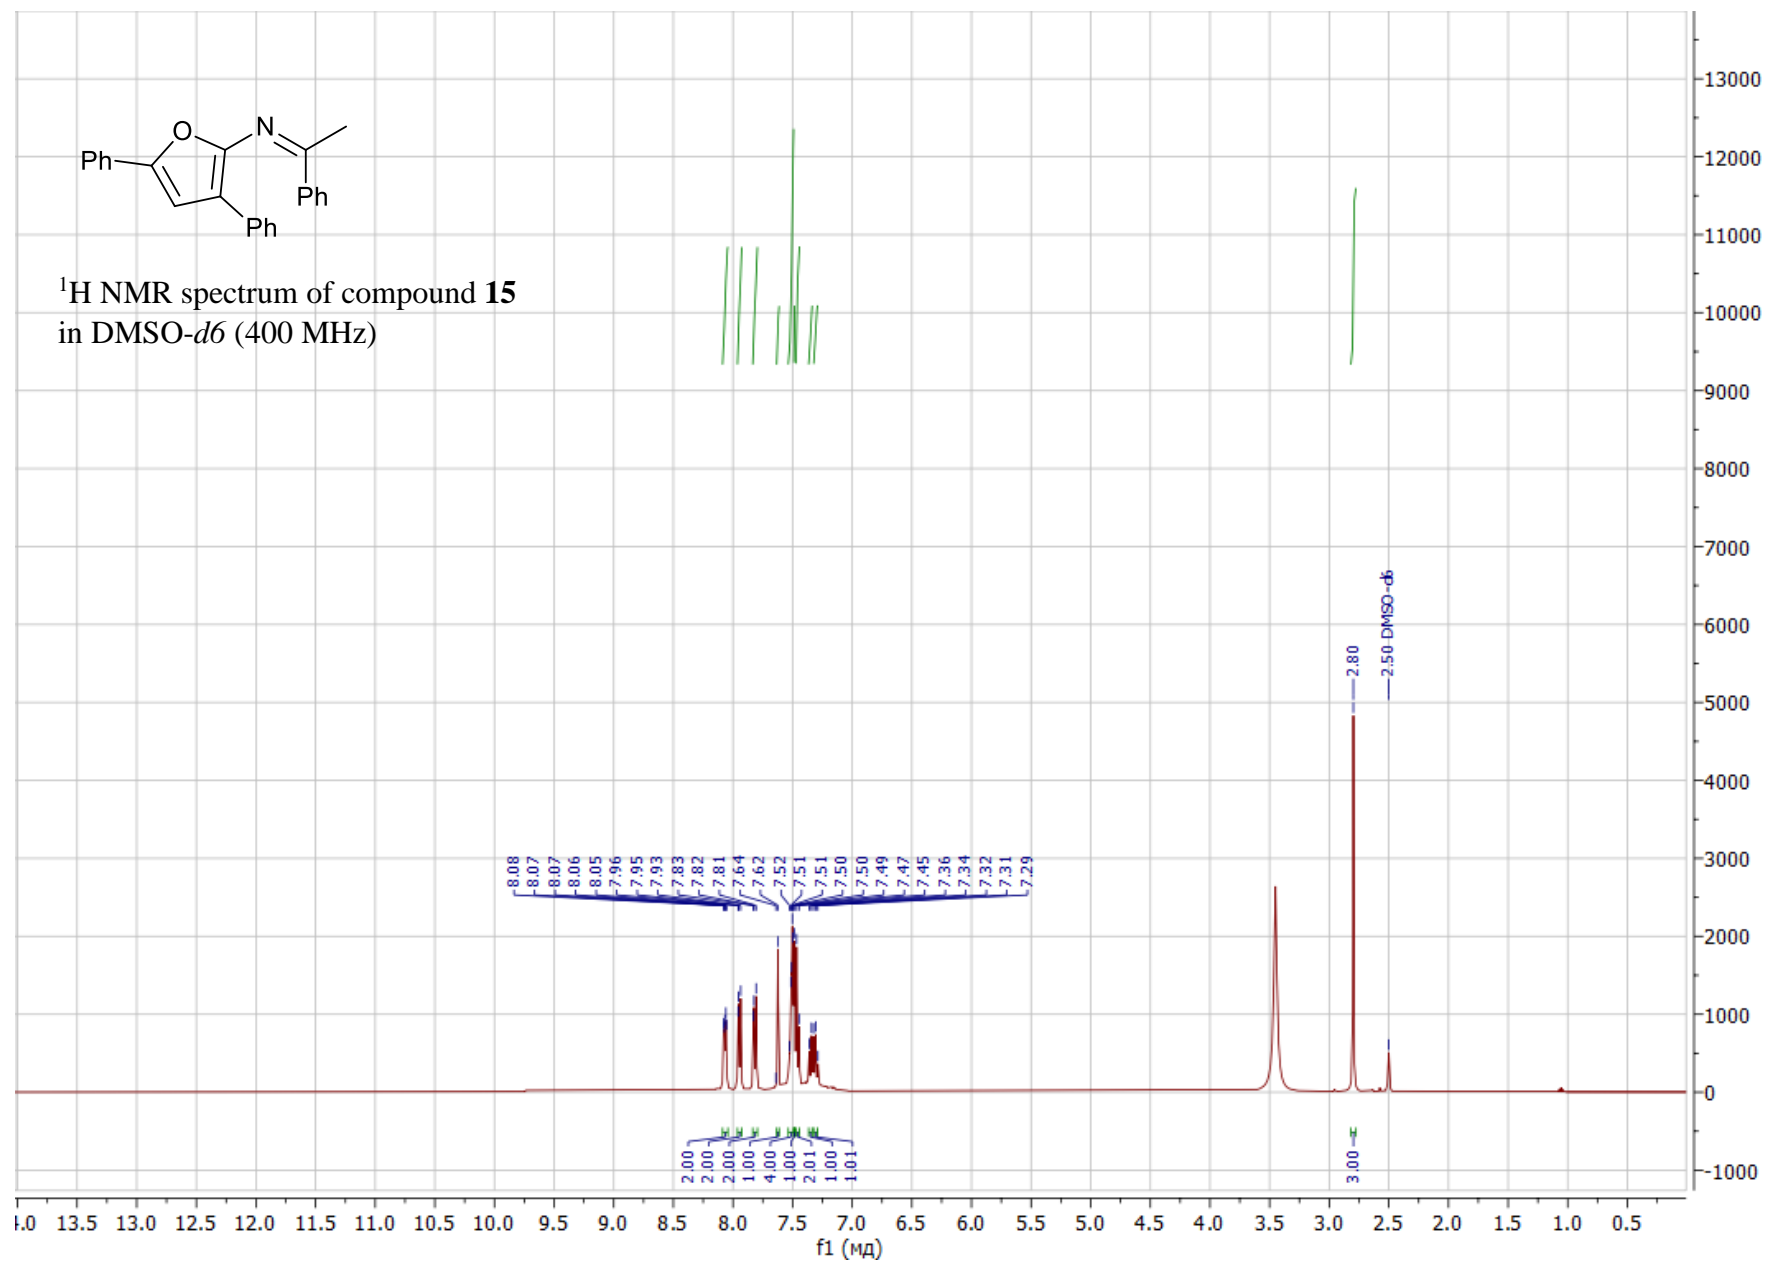

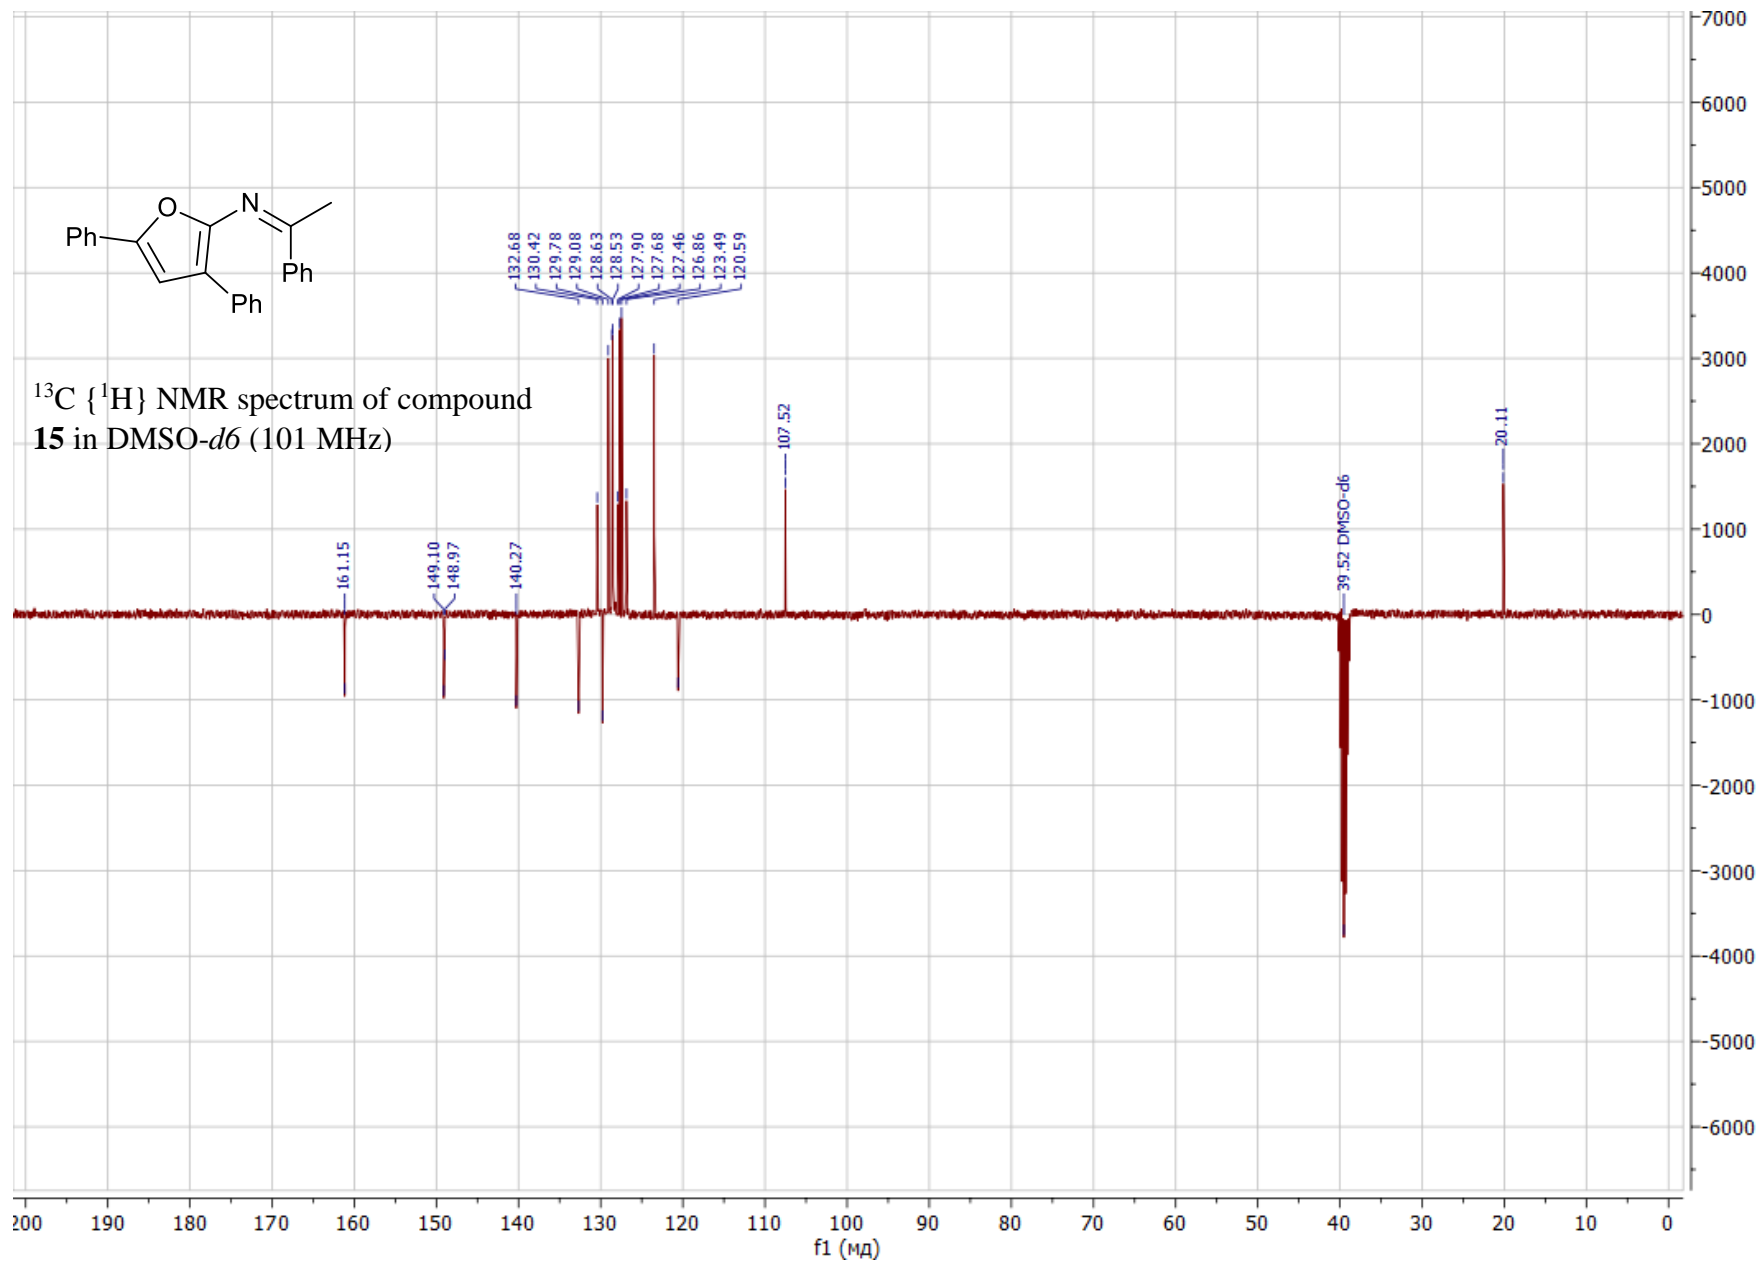

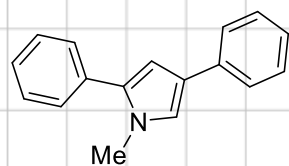

$^1\text{H}$  NMR spectrum of compound **16a**  
in DMSO- $d_6$  (400 MHz)

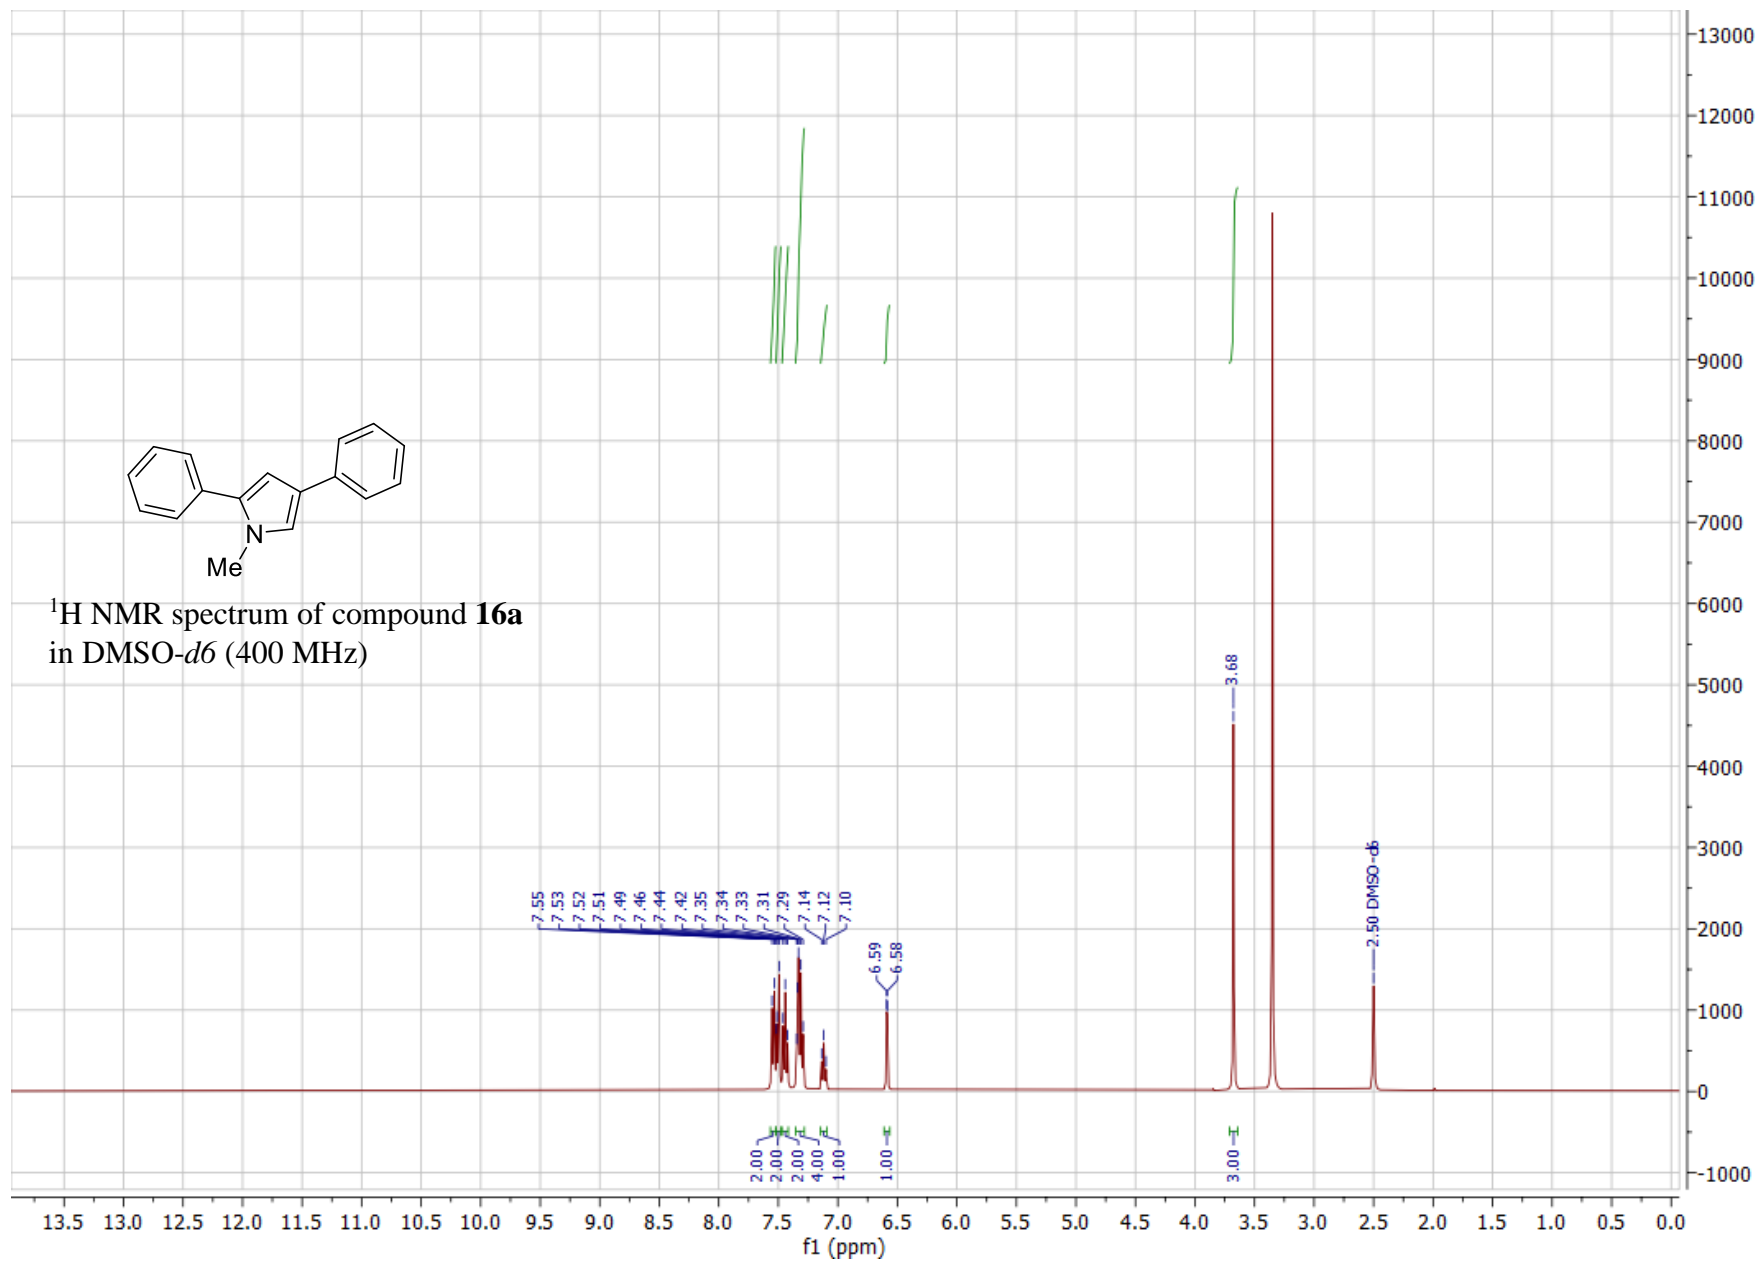

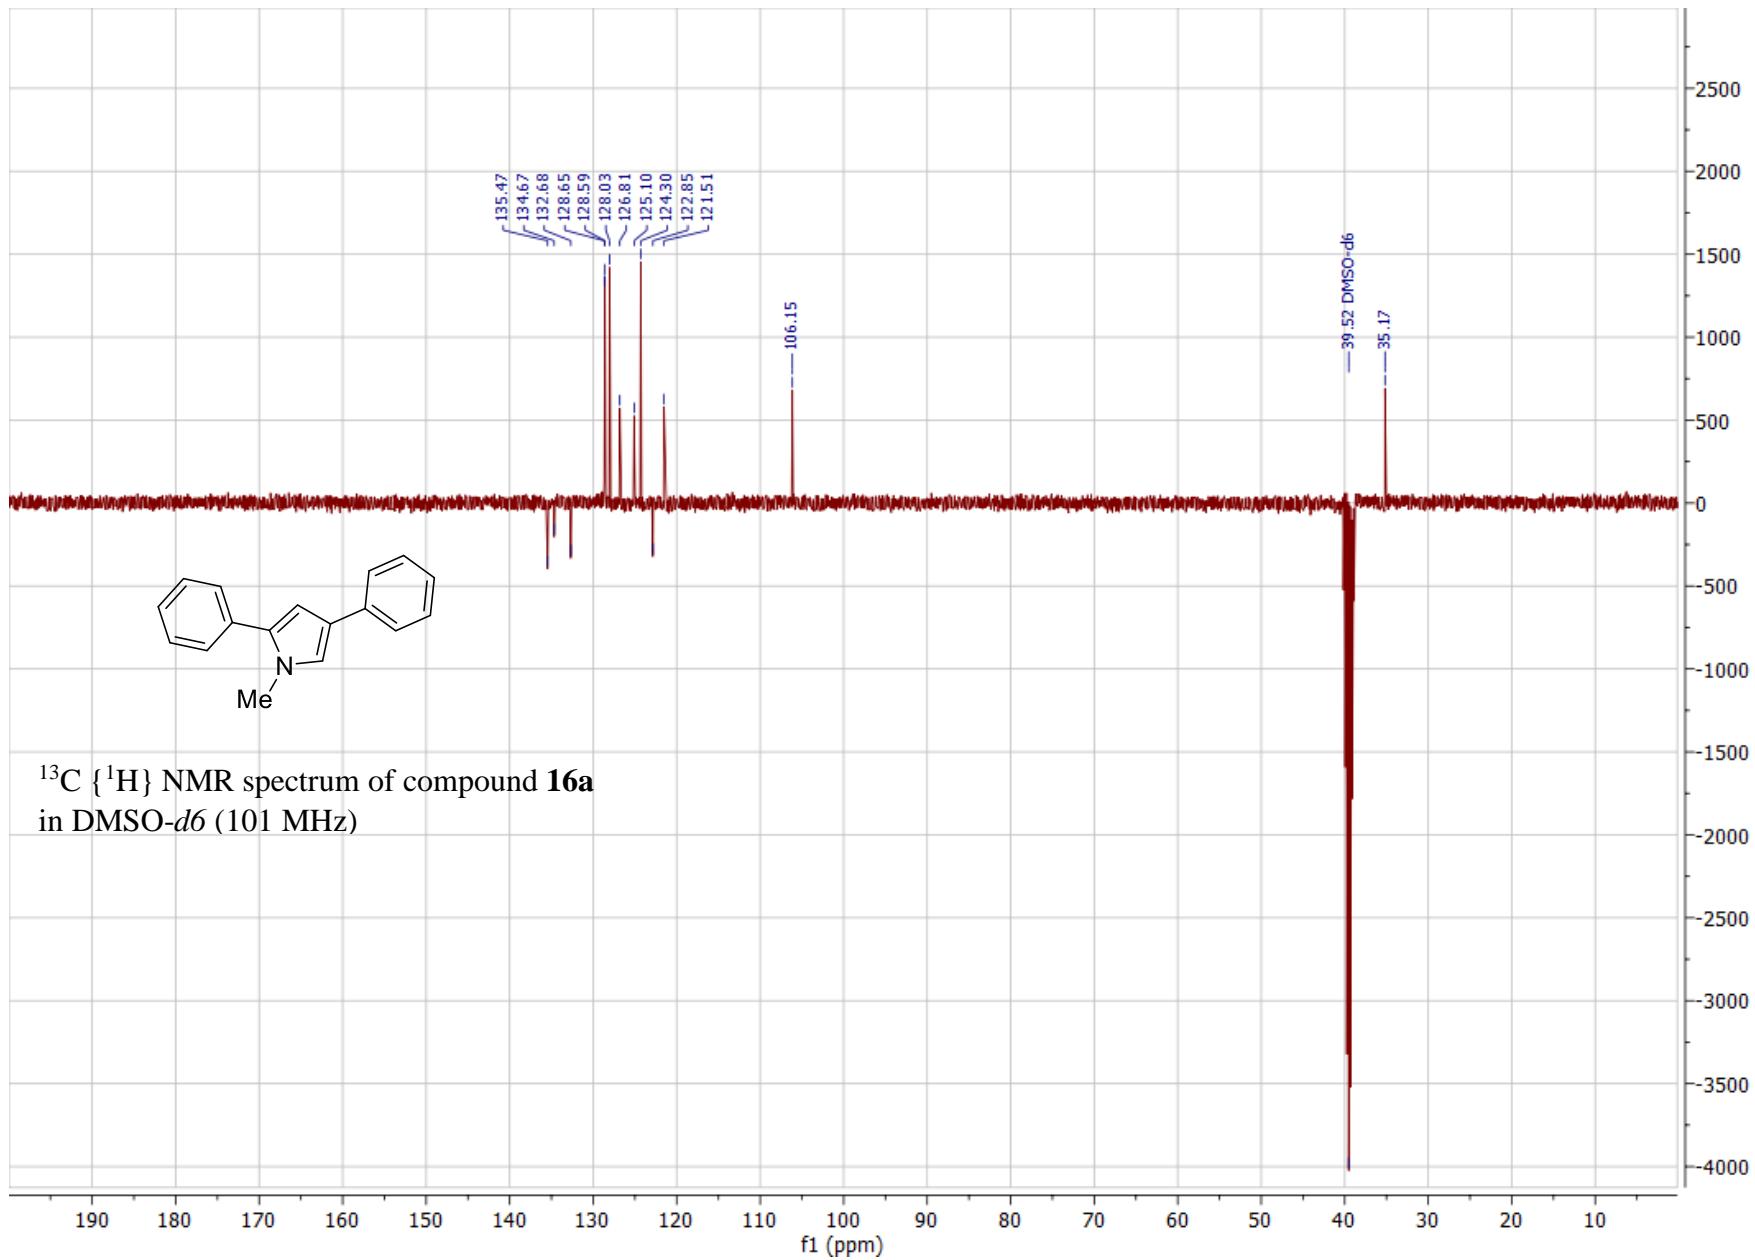

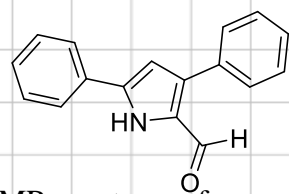

<sup>1</sup>H NMR spectrum of compound **17a**  
in DMSO-*d*<sub>6</sub> (400 MHz)

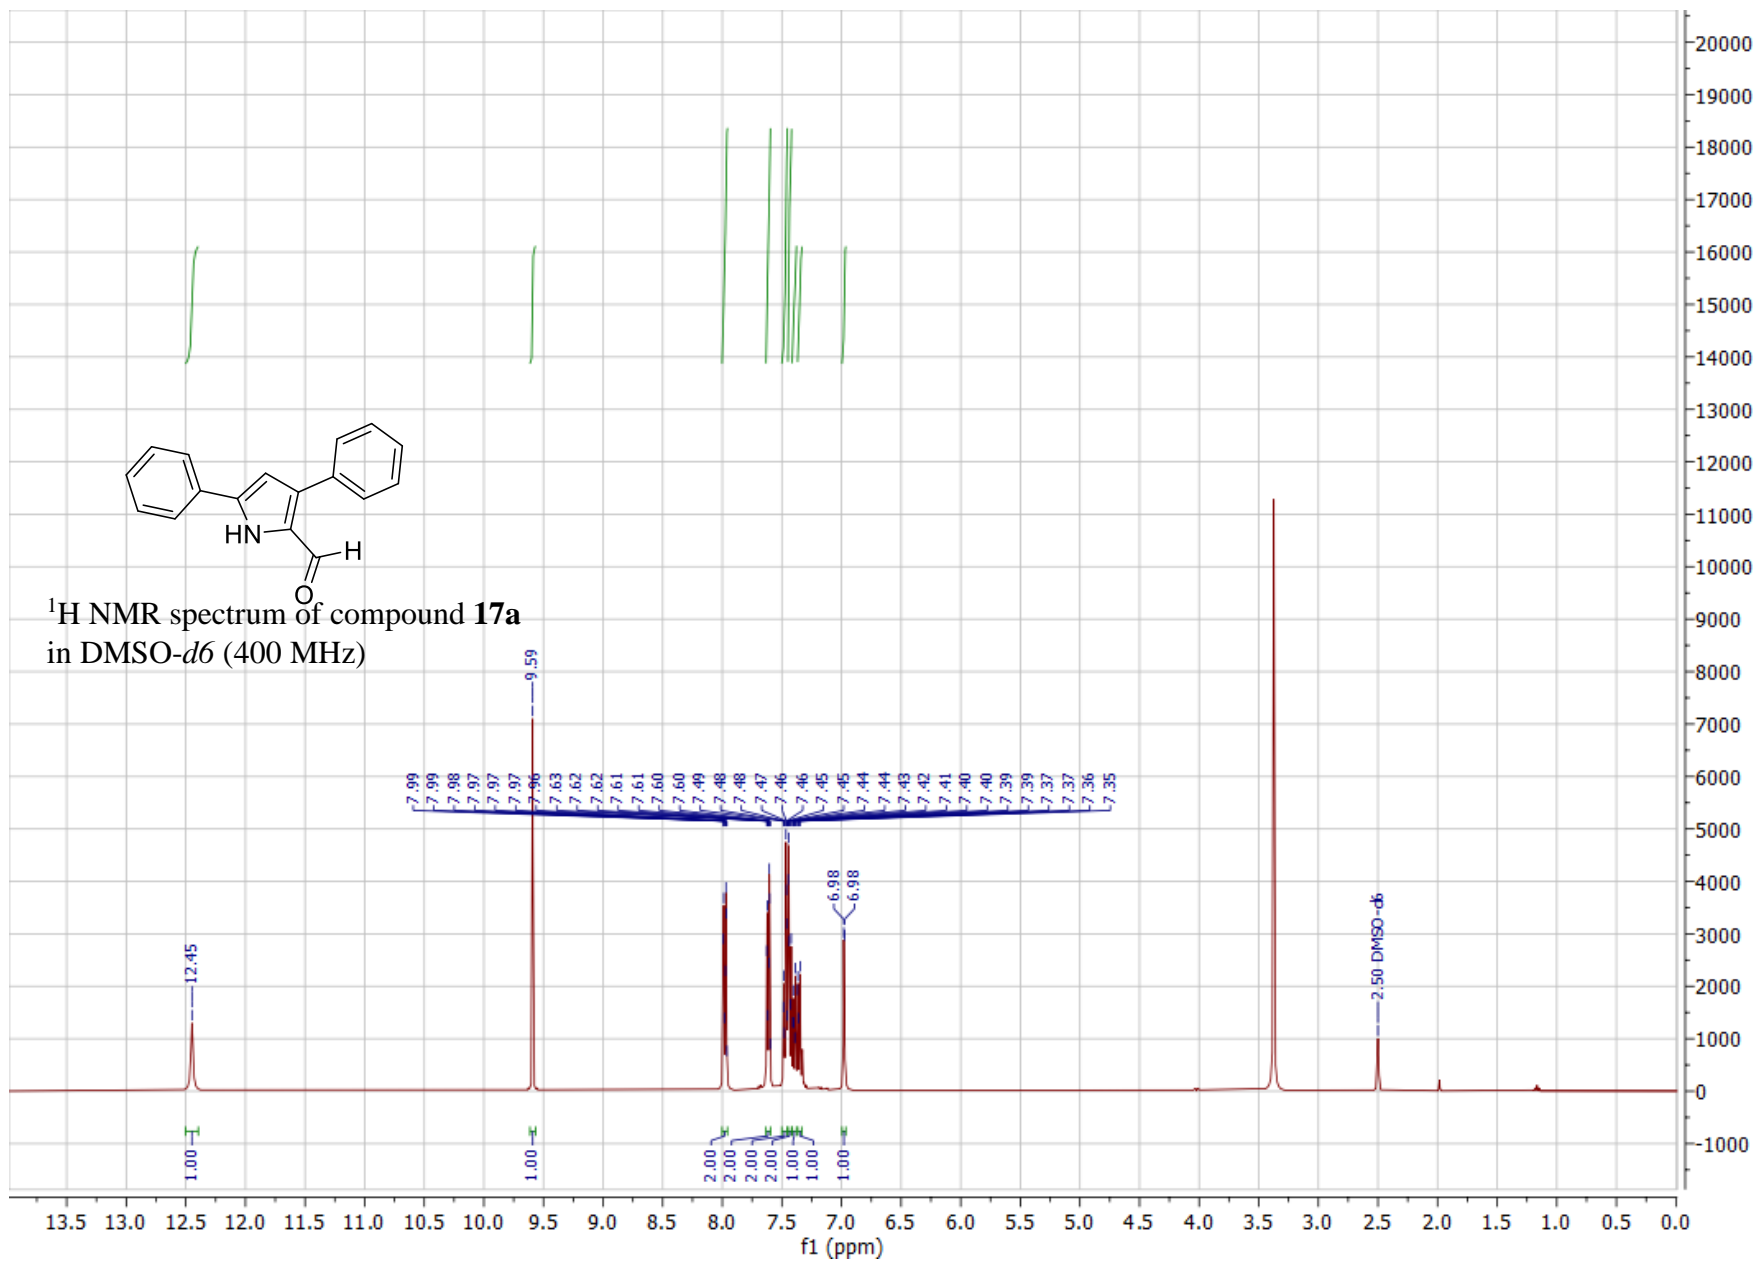

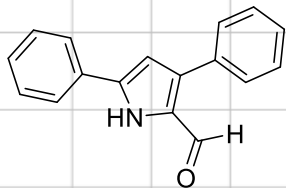

$^{13}\text{C}$   $\{^1\text{H}\}$  NMR spectrum of compound **17a**  
in  $\text{DMSO-}d_6$  (101 MHz)

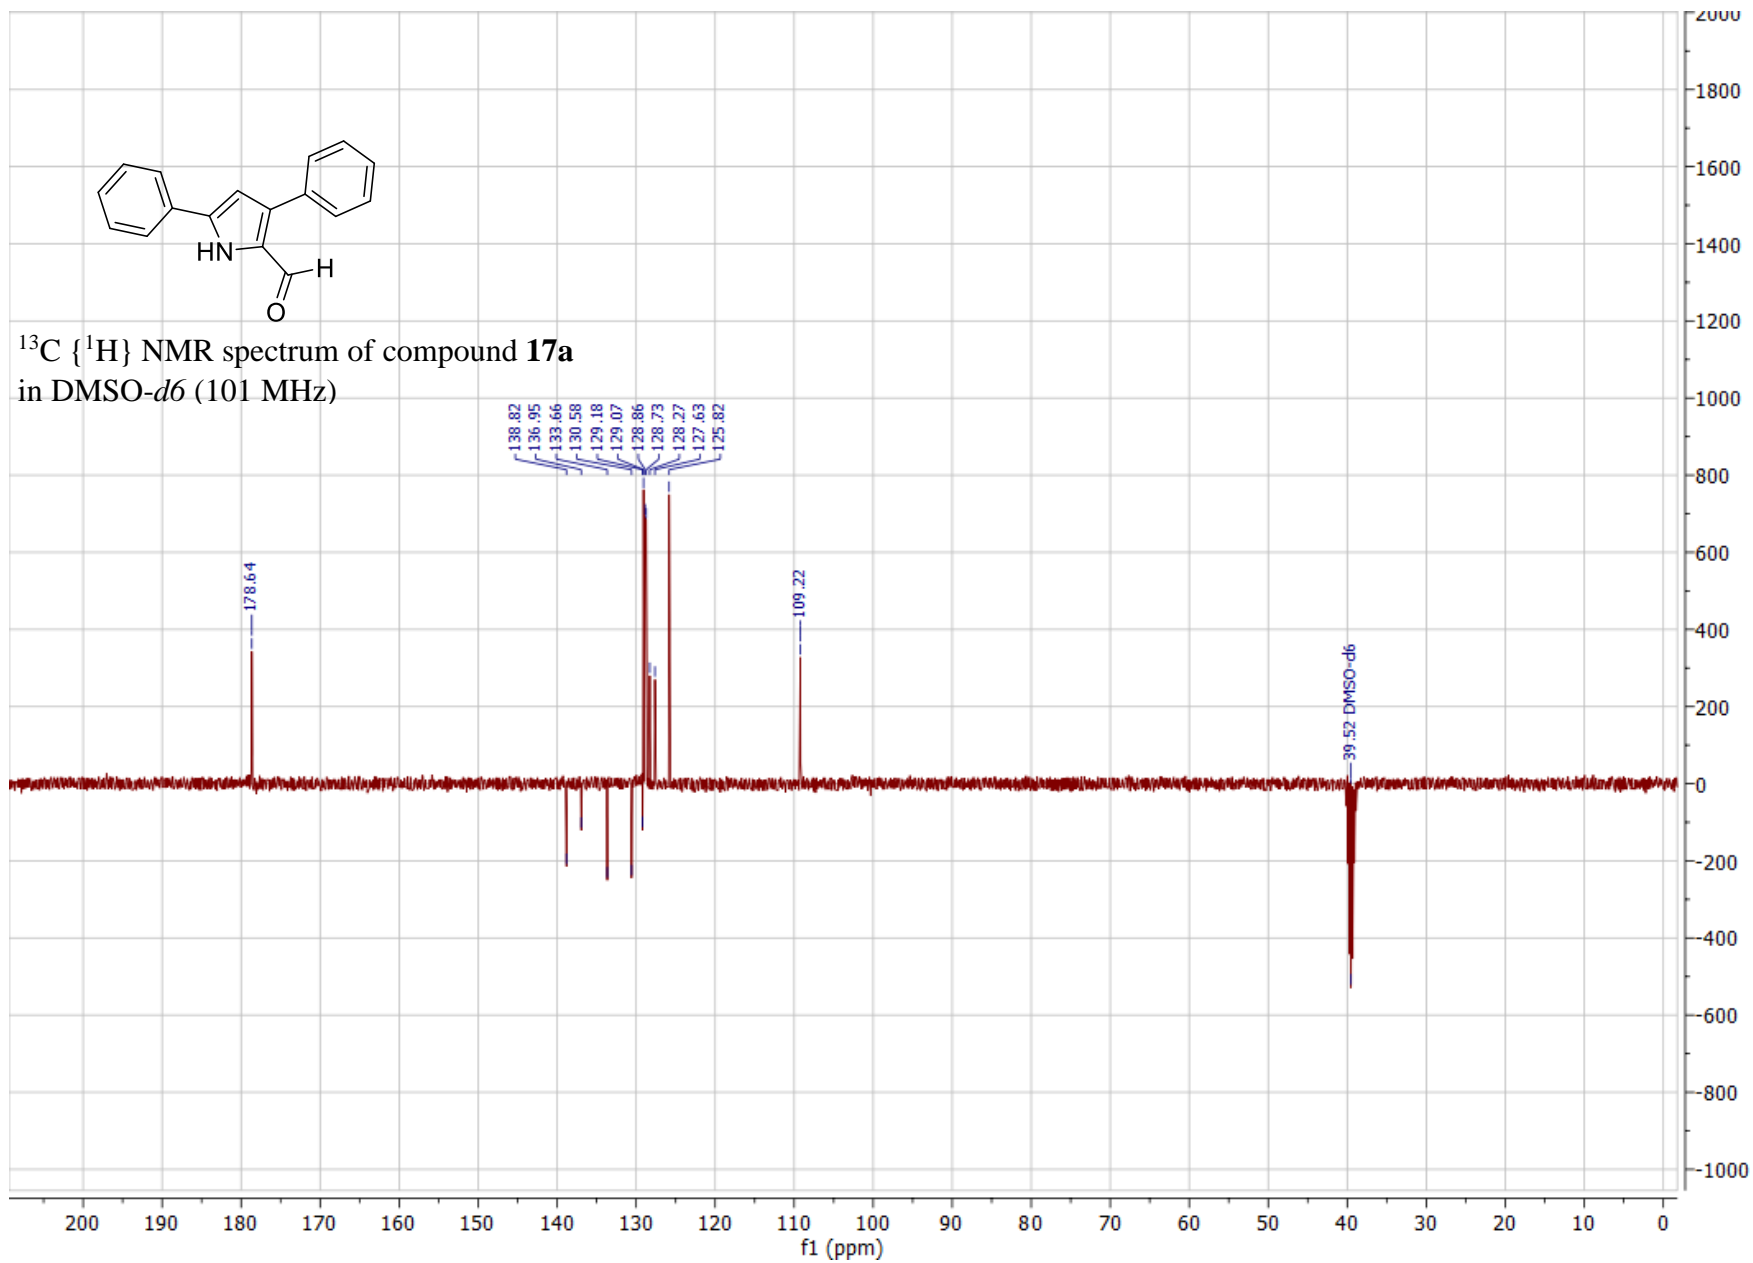

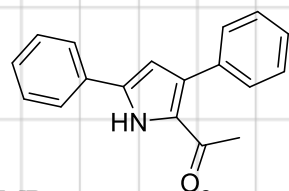

<sup>1</sup>H NMR spectrum of compound **18a**  
in DMSO-*d*<sub>6</sub> (400 MHz)

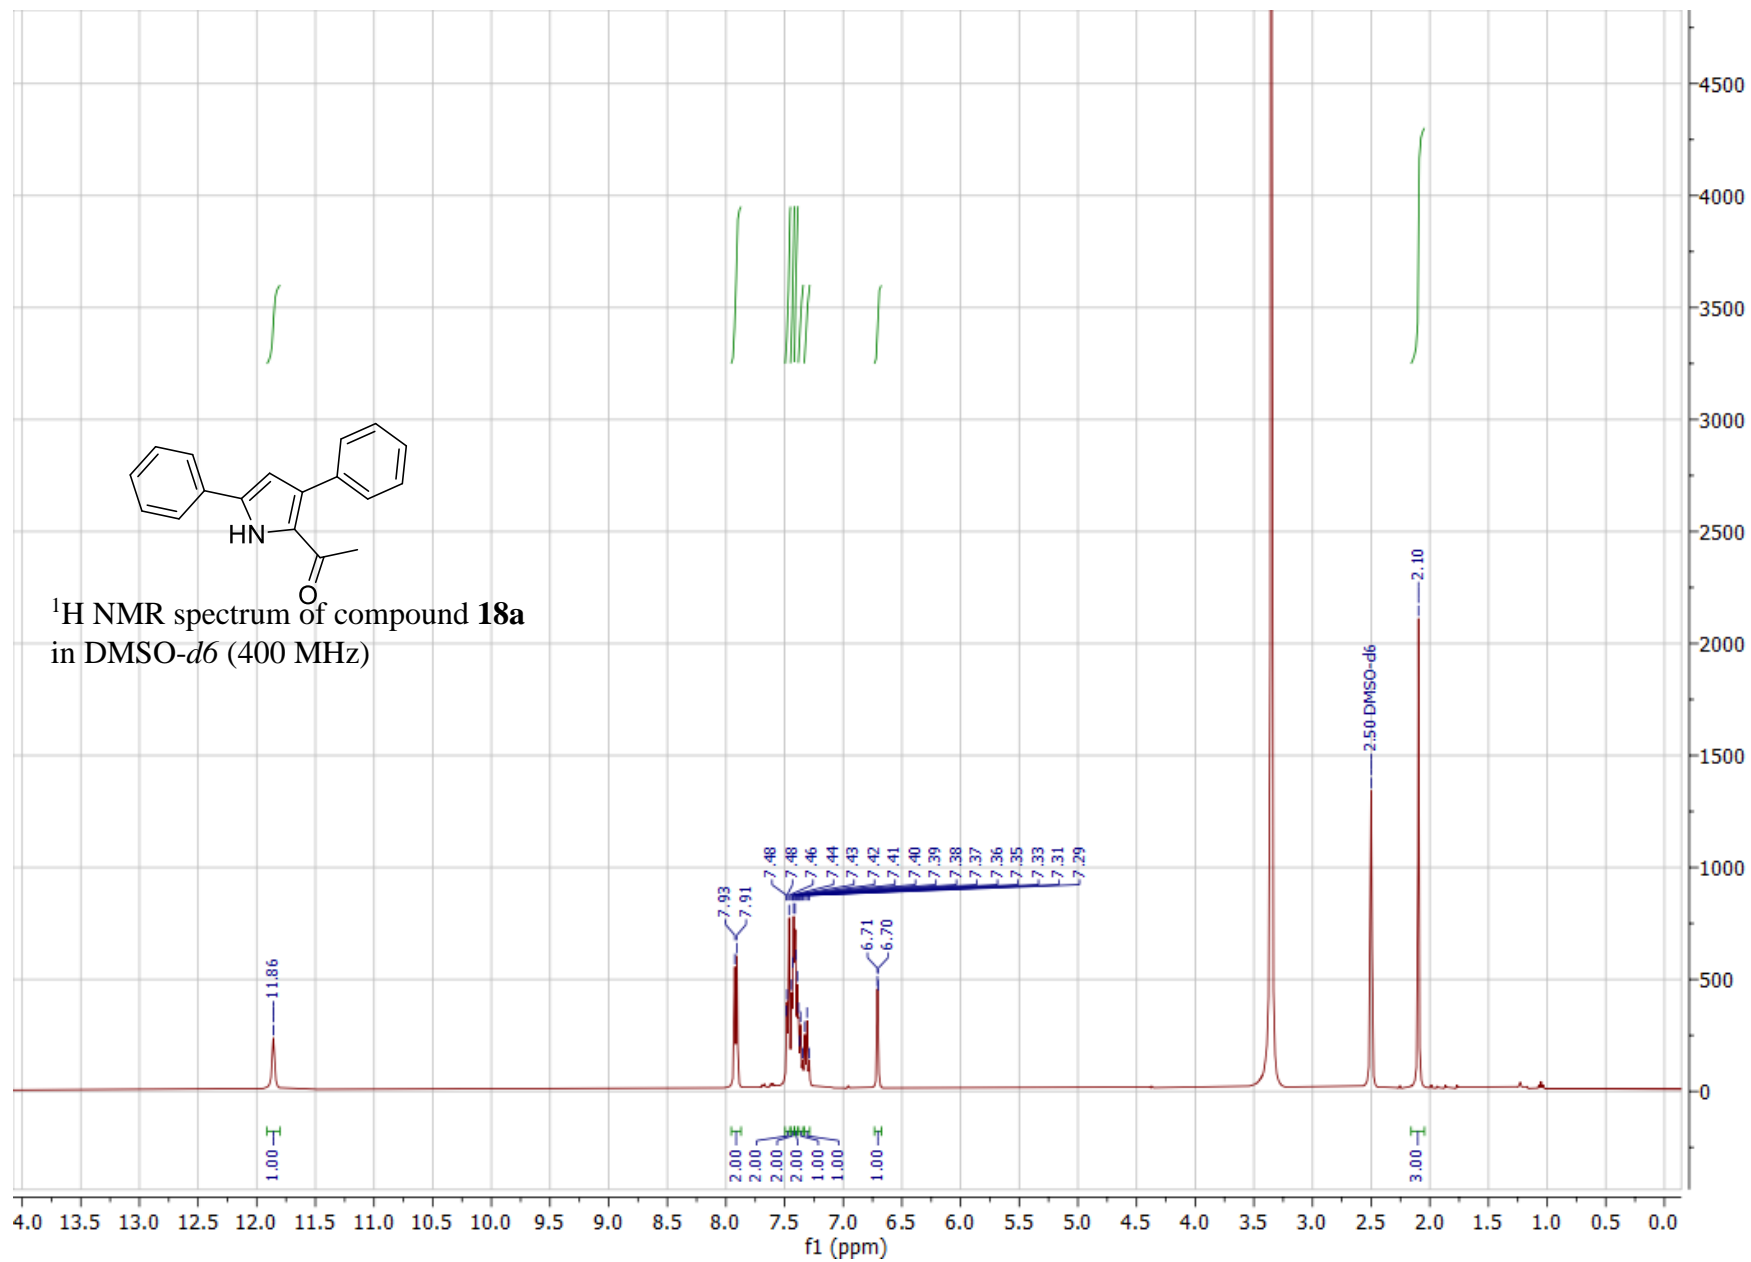

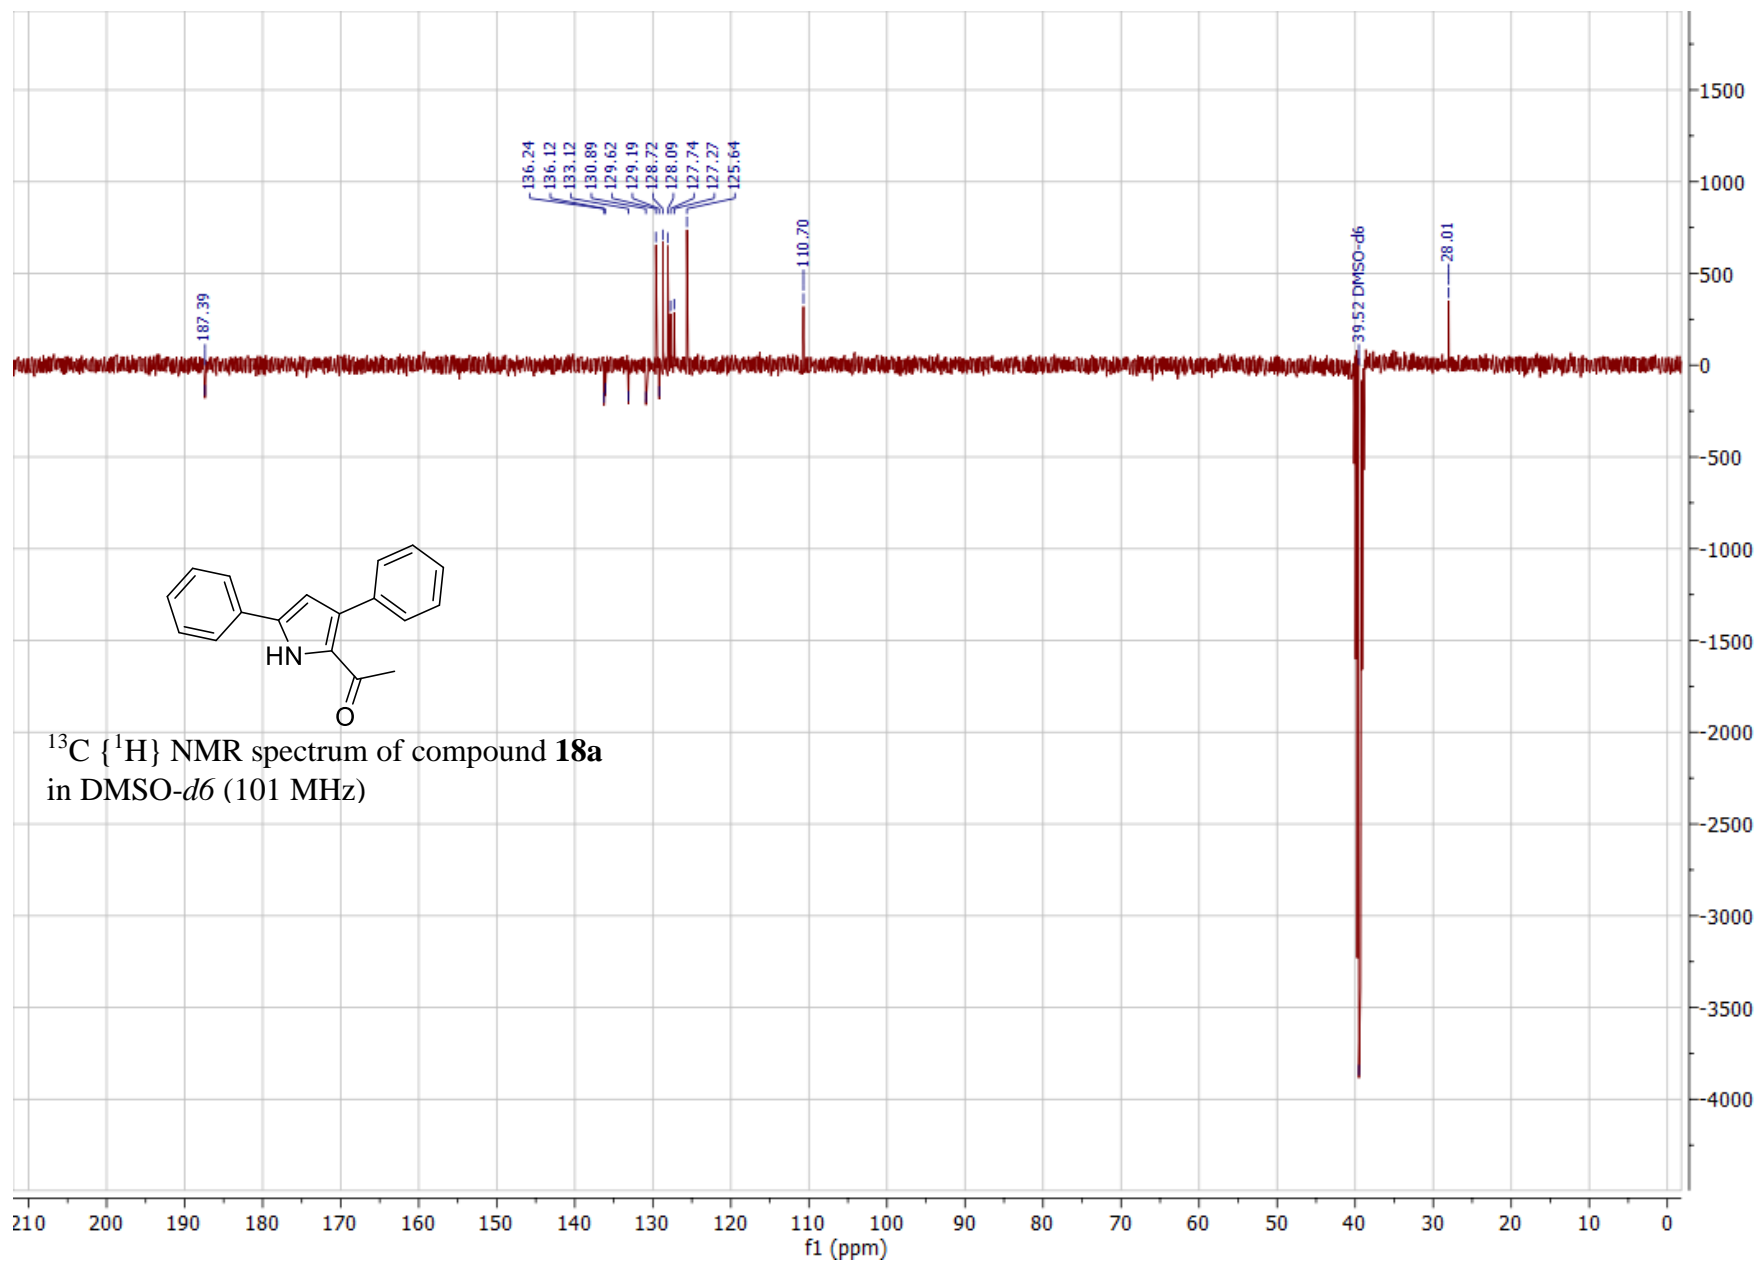

## HRMS-analysis of reaction mixture

1. HRMS spectrum of the reaction mixture after 30 minutes at 70 °C. The presence of intermediate furan **8a** (M/Z = 236) in the reaction mixture is observed.

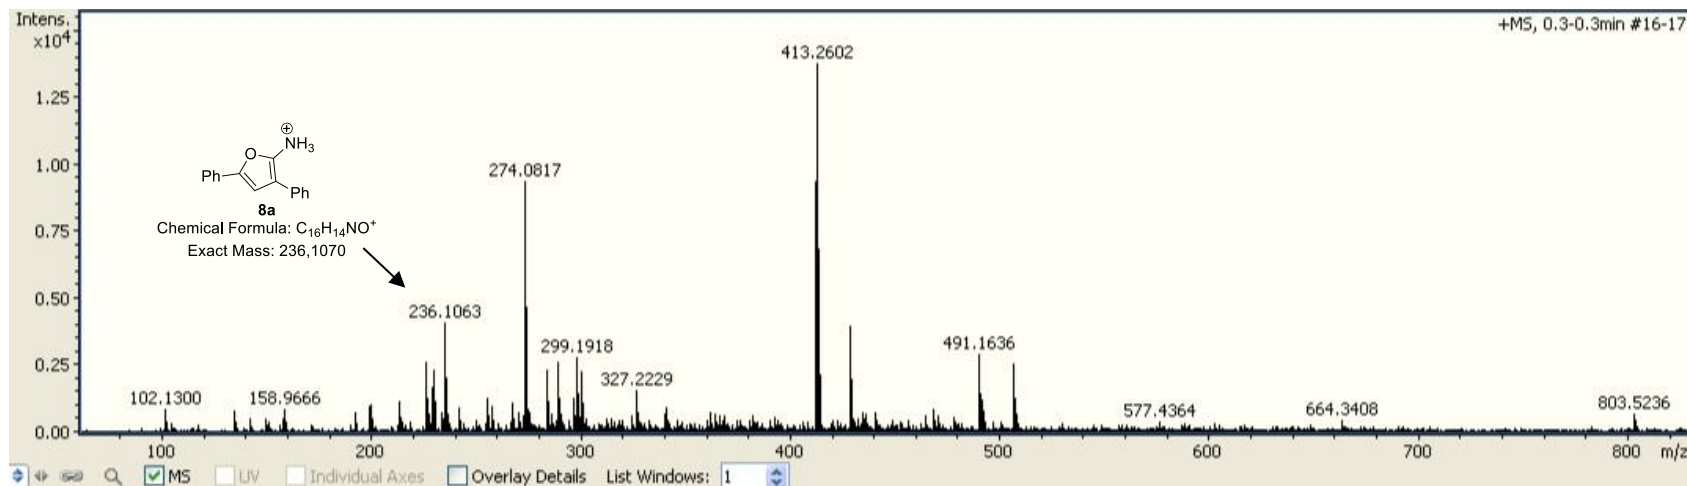

2. HRMS spectrum of the reaction mixture after addition of Zn and 15 minutes heating to 160°C. The presence of intermediates furan **8a** (M/Z = 236), amide **11a** (M/Z = 276) and 2,4-dihydro-1H-pyrrol-2-ol **13** (M/Z = 260) in the reaction mixture is observed. The target pyrrole is likely present in the spectrum as a dimeric form (M/Z = 439)

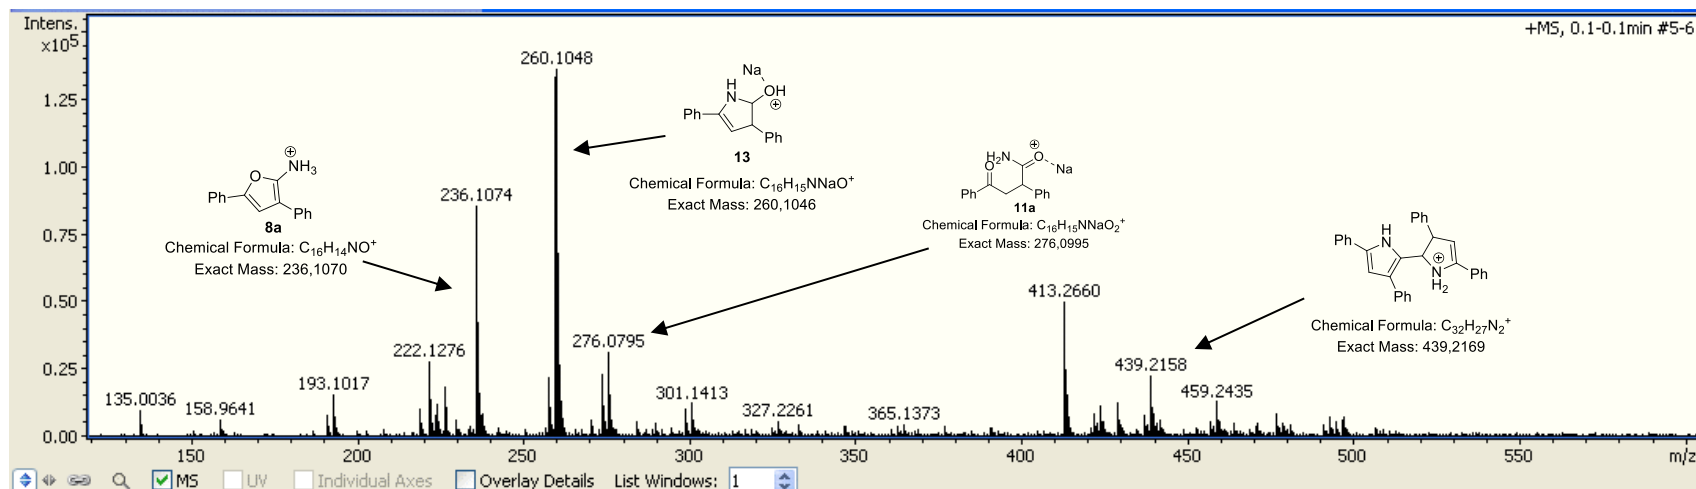

3. HRMS spectrum of the reaction mixture after addition of Zn and 45 minutes heating to 160°C. The presence of only 2,4-dihydro-1*H*-pyrrol-2-ol **13** (M/Z = 260) and dimeric form of pyrrole (M/Z = 439) in the reaction mixture is observed.

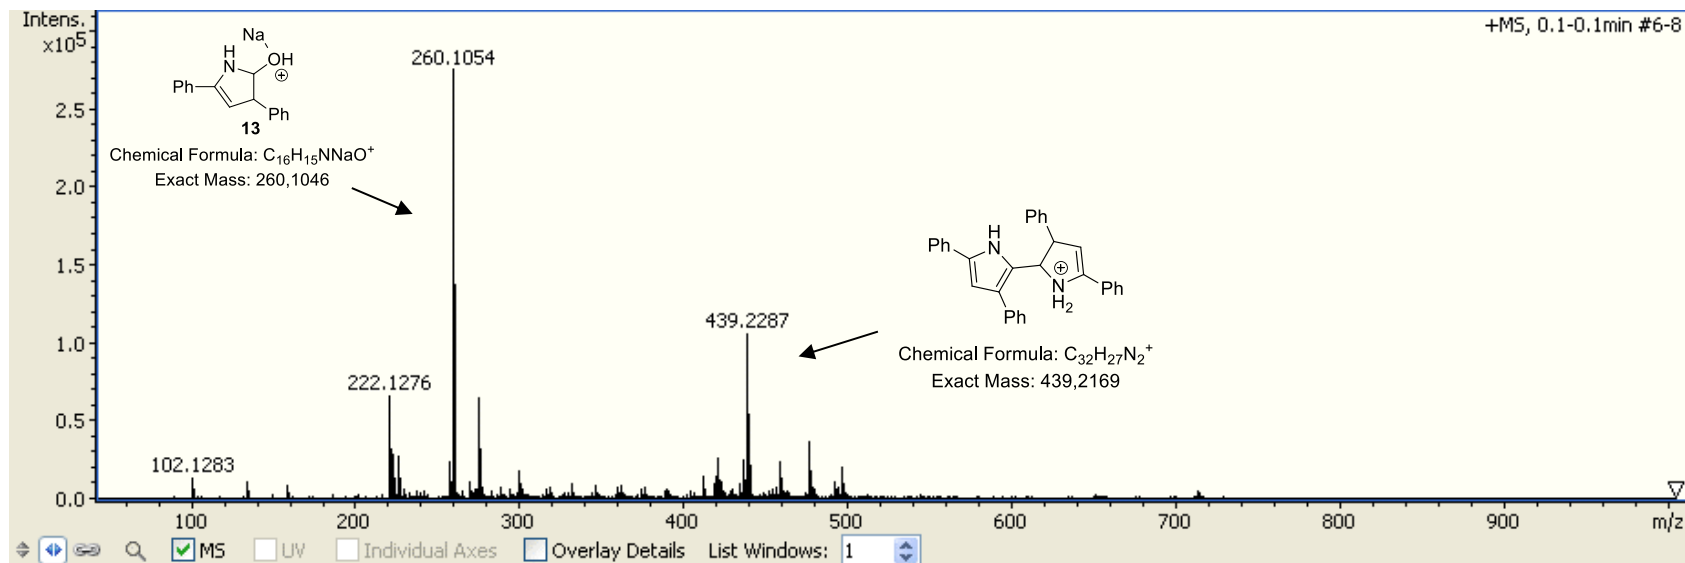

Supplement: d6ob00423g1.pdf [file d6ob00423g1.pdf]
